# Supplementary material for: In Silico Integration of Transcriptome and Interactome Predicts an ETP-ALL-Specific Transcriptional Footprint that Decodes its Developmental Propensity
Source: Front Cell Dev Biol. 2022 May 13;10:899752. doi: 10.3389/fcell.2022.899752 (PMC9138408; doi:10.3389/fcell.2022.899752)
Supplement: Supplementary file 2 [file Table3.XLSX]

## Sheet: ETP-ALL specific pathways
pathway name	set size	candidates	p-value	q-value	pathway source
		contained
Immune System	1828	145 (8.0%)	1.42e-18	1.34e-16	Reactome
Neutrophil degranulation	487	61 (12.6%)	2.36e-16	1.11e-14	Reactome
Cytokine Signaling in Immune system	471	56 (11.9%)	5.05e-14	1.58e-12	Reactome
Innate Immune System	1065	88 (8.3%)	3.96e-12	9.31e-11	Reactome
Signal Transduction	2432	153 (6.3%)	9.59e-11	1.8e-09	Reactome
Signaling by Interleukins	240	33 (13.8%)	2.27e-10	3.56e-09	Reactome
Platelet activation, signaling and aggregation	263	26 (9.9%)	1.18e-05	0.000158	Reactome
Hemostasis	677	49 (7.3%)	1.69e-05	0.000198	Reactome
Nuclear Events (kinase and transcription factor activation)	61	11 (18.0%)	1.94e-05	0.000203	Reactome
Platelet degranulation	131	16 (12.2%)	4.69e-05	0.000436	Reactome
MAPK family signaling cascades	270	25 (9.3%)	5.2e-05	0.000436	Reactome
Interleukin-1 family signaling	68	11 (16.2%)	5.57e-05	0.000436	Reactome
Diseases of signal transduction by growth factor receptors and second messengers	274	25 (9.1%)	6.62e-05	0.000478	Reactome
Response to elevated platelet cytosolic Ca2+	136	16 (11.8%)	7.42e-05	0.000498	Reactome
Signaling by Receptor Tyrosine Kinases	464	35 (7.5%)	0.000133	0.000834	Reactome
Toll-like Receptor Cascades	130	15 (11.5%)	0.000154	0.000905	Reactome
Disease	1029	63 (6.1%)	0.000178	0.00092	Reactome
MAP kinase activation	65	10 (15.4%)	0.000186	0.00092	Reactome
Interleukin-17 signaling	65	10 (15.4%)	0.000186	0.00092	Reactome
RAF/MAP kinase cascade	235	21 (8.9%)	0.000331	0.00156	Reactome
MAPK1/MAPK3 signaling	236	21 (8.9%)	0.000351	0.00157	Reactome
Toll Like Receptor 4 (TLR4) Cascade	112	13 (11.6%)	0.000394	0.00168	Reactome
Signaling by NTRK1 (TRKA)	114	13 (11.4%)	0.000468	0.00191	Reactome
Toll Like Receptor 3 (TLR3) Cascade	87	11 (12.6%)	0.000524	0.00205	Reactome
TRIF(TICAM1)-mediated TLR4 signaling	89	11 (12.4%)	0.000637	0.00207	Reactome
MyD88-independent TLR4 cascade	90	11 (12.2%)	0.000701	0.00207	Reactome
MyD88 cascade initiated on plasma membrane	77	10 (13.0%)	0.000752	0.00207	Reactome
Toll Like Receptor 10 (TLR10) Cascade	77	10 (13.0%)	0.000752	0.00207	Reactome
Toll Like Receptor 5 (TLR5) Cascade	77	10 (13.0%)	0.000752	0.00207	Reactome
TRAF6 mediated induction of NFkB and MAP kinases upon TLR7/8 or 9 activation	77	10 (13.0%)	0.000752	0.00207	Reactome
Leishmania infection	323	25 (7.8%)	0.000752	0.00207	Reactome
MyD88:MAL(TIRAP) cascade initiated on plasma membrane	91	11 (12.1%)	0.00077	0.00207	Reactome
Toll Like Receptor TLR1:TLR2 Cascade	91	11 (12.1%)	0.00077	0.00207	Reactome
Toll Like Receptor TLR6:TLR2 Cascade	91	11 (12.1%)	0.00077	0.00207	Reactome
Toll Like Receptor 2 (TLR2) Cascade	91	11 (12.1%)	0.00077	0.00207	Reactome
MyD88 dependent cascade initiated on endosome	78	10 (12.8%)	0.000833	0.00218	Reactome
Toll Like Receptor 7/8 (TLR7/8) Cascade	79	10 (12.7%)	0.000922	0.00234	Reactome
Toll Like Receptor 9 (TLR9) Cascade	80	10 (12.5%)	0.00102	0.00251	Reactome
Signaling by the B Cell Receptor (BCR)	126	13 (10.5%)	0.00104	0.00251	Reactome
Signaling by NTRKs	127	13 (10.2%)	0.0013	0.00306	Reactome
C-type lectin receptors (CLRs)	84	10 (12.0%)	0.00136	0.00311	Reactome
Interferon Signaling	162	15 (9.3%)	0.0016	0.00357	Reactome
Interferon gamma signaling	96	10 (10.4%)	0.00402	0.00879	Reactome
Negative regulation of the PI3K/AKT network	107	10 (9.3%)	0.0086	0.0184	Reactome
Cell surface interactions at the vascular wall	215	16 (7.5%)	0.00893	0.0186	Reactome
CDC42 GTPase cycle	160	13 (8.1%)	0.00948	0.0194	Reactome

## Sheet: non ETP-ALL specific pathways
pathway name	set size	candidates	p-value	q-value	pathway source
		contained
Cell Cycle, Mitotic	524	49 (9.4%)	2.88e-12	1.42e-10	Reactome
Cell Cycle	622	54 (8.7%)	3.88e-12	1.42e-10	Reactome
Resolution of Sister Chromatid Cohesion	109	21 (19.3%)	1.4e-11	3.4e-10	Reactome
RHO GTPases Activate Formins	123	21 (17.1%)	1.52e-10	2.5e-09	Reactome
EML4 and NUDC in mitotic spindle formation	100	19 (19.0%)	1.71e-10	2.5e-09	Reactome
Mitotic Spindle Checkpoint	114	20 (17.5%)	2.53e-10	3.08e-09	Reactome
Mitotic Metaphase and Anaphase	196	26 (13.3%)	3.3e-10	3.44e-09	Reactome
Separation of Sister Chromatids	130	21 (16.2%)	4.43e-10	4.04e-09	Reactome
Amplification of signal from unattached kinetochores via a MAD2 inhibitory signal	96	18 (18.8%)	6.54e-10	4.78e-09	Reactome
Amplification of signal from the kinetochores	96	18 (18.8%)	6.54e-10	4.78e-09	Reactome
Mitotic Prometaphase	192	25 (13.0%)	1.08e-09	7.18e-09	Reactome
Mitotic Anaphase	195	25 (12.8%)	1.5e-09	9.14e-09	Reactome
Signaling by Rho GTPases	689	51 (7.4%)	4.65e-09	2.61e-08	Reactome
M Phase	383	35 (9.2%)	8.08e-09	4.22e-08	Reactome
Signaling by Rho GTPases, Miro GTPases and RHOBTB3	705	51 (7.2%)	1e-08	4.88e-08	Reactome
Cell Cycle Checkpoints	249	27 (10.9%)	1.23e-08	5.6e-08	Reactome
APC/C-mediated degradation of cell cycle proteins	44	11 (25.0%)	6.39e-08	2.59e-07	Reactome
Regulation of mitotic cell cycle	44	11 (25.0%)	6.39e-08	2.59e-07	Reactome
Generation of second messenger molecules	42	10 (24.4%)	3.3e-07	1.27e-06	Reactome
RHO GTPase Effectors	314	27 (8.6%)	1.42e-06	5.2e-06	Reactome
Signal Transduction	2432	113 (4.7%)	1.7e-06	5.91e-06	Reactome
Costimulation by the CD28 family	77	12 (15.8%)	3.26e-06	1.08e-05	Reactome
TCR signaling	73	11 (15.3%)	1.16e-05	3.68e-05	Reactome
Mitotic G1 phase and G1/S transition	104	13 (12.5%)	1.8e-05	5.46e-05	Reactome
RHO GTPase cycle	442	30 (6.8%)	4.43e-05	0.000129	Reactome
G1/S Transition	76	10 (13.2%)	0.000107	0.000302	Reactome
Golgi-to-ER retrograde transport	116	10 (8.6%)	0.00309	0.00836	Reactome
G2/M Transition	138	11 (8.0%)	0.00361	0.00941	Reactome
Mitotic G2-G2/M phases	140	11 (7.9%)	0.00403	0.0101	Reactome
Factors involved in megakaryocyte development and platelet production	145	11 (7.6%)	0.00525	0.0128	Reactome
Intracellular signaling by second messengers	259	16 (6.2%)	0.00658	0.0155	Reactome
Adaptive Immune System	719	34 (4.8%)	0.00762	0.0174	Reactome
