# Supplementary material for: In Silico Integration of Transcriptome and Interactome Predicts an ETP-ALL-Specific Transcriptional Footprint that Decodes its Developmental Propensity
Source: Front Cell Dev Biol. 2022 May 13;10:899752. doi: 10.3389/fcell.2022.899752 (PMC9138408; doi:10.3389/fcell.2022.899752)
Supplement: Supplementary file 3 [file Table9.XLSX]

## Sheet: MCC
node_name	MCC
KIT	101
HGF	61
NT5E	54
PROM1	53
CD33	50
ANPEP	50
CDH2	49
MPO	47
IL1B	35
CXCL2	32
DNTT	31
PPBP	26
ZBTB16	18
LEF1	18
CTSG	13
CCL1	12
GJA1	11
GATA3	11
AREG	10
EGR1	9
LGR5	7
SDCBP	7
FABP5	6
CR2	6
SUCNR1	6
UBE2E3	5
IGHV4-38-2	5
FCER1A	5
CPA3	5
NOG	5
KLHL13	4
TPSAB1	4
MS4A3	4
BHLHE40	4
BCL11B	4
FZD6	4
RCBTB2	3
GAD1	3
RAB7B	2
RAB27B	2
IL18RAP	2
PDGFC	2
TUBB2A	2
HOPX	2
TFPI	2
TNFSF13B	2
CTBP2	2
BAMBI	2
WBP5	1
NGFRAP1	1
LPAR6	1
RGS1	1
TNS3	1
GRB10	1
IRX1	1
VANGL1	1
FOXC1	1
EPC1	1
CYTL1	1
CTHRC1	1
IGFBP7	1
HES1	1
