# Supplementary material for: In Silico Integration of Transcriptome and Interactome Predicts an ETP-ALL-Specific Transcriptional Footprint that Decodes its Developmental Propensity
Source: Front Cell Dev Biol. 2022 May 13;10:899752. doi: 10.3389/fcell.2022.899752 (PMC9138408; doi:10.3389/fcell.2022.899752)
Supplement: Supplementary file 6 [file Table4.XLSX]

## Sheet: ETP-ALL specific complexes
Term	P-value	Adjusted P-value	Old P-value	Old Adjusted P-value	Odds Ratio	Combined Score	Genes
SMAD7-SMURF2 complex (human)	0.00101286	0.0589277	0	0	38726	267015	SMURF2;SMAD7
Cd74-Cd44 receptor complex (mouse)	0.00101286	0.0589277	0	0	38726	267015	CD74;CD44
Cebpa-Smarca2 complex (mouse)	0.00101286	0.0589277	0	0	38726	267015	CEBPA;SMARCA2
SNARE complex (Stx4, Stx6, Stx7, Vamp3, Vamp7, Vamp8, Vti1b) (mouse)	0.00102258	0.0589277	0	0	22.901	157.683	VAMP8;STX7;VAMP3
CtBP complex (human)	0.00174241	0.0589277	0	0	9.40576	59.7499	ZEB2;CTBP2;CDYL;RREB1
PLC-gamma-2-Lyn-FcR-gamma complex (human)	0.00297427	0.0589277	0	0	60.9827	354.782	LYN;PLCG2
TGF-beta receptor-SMAD3 complex (human)	0.00297427	0.0589277	0	0	60.9827	354.782	SMAD3;TGFBR1
TGF-beta receptor II-TGF-beta receptor I-TGF-beta1 complex (human)	0.00297427	0.0589277	0	0	60.9827	354.782	TGFB1;TGFBR1
TGF-beta receptor I-Axin-SMAD3 complex (human)	0.00297427	0.0589277	0	0	60.9827	354.782	SMAD3;TGFBR1
Il3rb1-Shc-Ship complex, IL-3 stimulated (mouse)	0.00297427	0.0589277	0	0	60.9827	354.782	INPP5D;CSF2RB
SMURF2-SMAD3-SnoN complex, TGF(beta)-dependent (human)	0.00297427	0.0589277	0	0	60.9827	354.782	SMAD3;SMURF2
PKC-alpha-PLD1-PLC-gamma-2 signaling complex, lacritin stimulated (human)	0.00297427	0.0589277	0	0	60.9827	354.782	PLCG2;PLD1
CBP-RARA-RXRA-DNA complex, ligand stimulated (human)	0.00297427	0.0589277	0	0	60.9827	354.782	RXRA;RARA
NFAT-JUN-FOS DNA-protein complex (human)	0.00297427	0.0589277	0	0	60.9827	354.782	NFATC2;FOS
SMAD3-SMAD4-FOXO3 complex (human)	0.00297427	0.0589277	0	0	60.9827	354.782	SMAD3;FOXO3
PLC-gamma-2-Lab-Blnk complex, BCR stimulated (mouse)	0.00297427	0.0589277	0	0	60.9827	354.782	LAT2;PLCG2
RSmad complex (human)	0.00326372	0.0608588	0	0	13.0843	74.906	SMAD3;NCOA3;ARID1B
Polycystin-1 multiprotein complex (ACTN1, CDH1, SRC, JUP, VCL, CTNNB1, PXN, BCAR1, PKD1, PTK2, TLN1) (human)	0.00438212	0.0659243	0	0	11.4481	62.166	JUP;ACTN1;VCL
PLC-gamma-2-Syk-LAT-FcR-gamma complex (human)	0.00582297	0.0659243	0	0	30.4898	156.899	SYK;PLCG2
ESR1-RELA-BCL3-NCOA3 complex (human)	0.00582297	0.0659243	0	0	30.4898	156.899	NCOA3;BCL3
SNX complex (SNX1a, SNX2, SNX4, INSR) (human)	0.00582297	0.0659243	0	0	30.4898	156.899	SNX2;INSR
SNX complex (SNX1a, SNX2, SNX4, TFRC) (human)	0.00582297	0.0659243	0	0	30.4898	156.899	SNX2;TFRC
SNARE complex (STX4, VAMP8, VAMP3, SNAP23) (human)	0.00582297	0.0659243	0	0	30.4898	156.899	VAMP8;VAMP3
PLC-gamma-2-SLP-76-Lyn-Grb2 complex (human)	0.00582297	0.0659243	0	0	30.4898	156.899	LYN;PLCG2
SMAD3-SMAD4-cJun-cFos complex (human)	0.00582297	0.0659243	0	0	30.4898	156.899	SMAD3;FOS
SMAD3-SMAD4-FOXO3-FOXG1 complex (human)	0.00582297	0.0659243	0	0	30.4898	156.899	SMAD3;FOXO3
Gata2-Tal1-Tcf3-Lmo2 complex (mouse)	0.00582297	0.0659243	0	0	30.4898	156.899	LMO2;GATA2
SNARE complex (VAMP3, VAMP4, VAMP8, STX6) (human)	0.00582297	0.0659243	0	0	30.4898	156.899	VAMP8;VAMP3
LMO4-gp130 complex (human)	0.00950062	0.10039	0	0	20.3255	94.6434	LMO4;JAK1
Ubiquitin E3 ligase (SMAD3, BTRC, CUL1, SKP1A, RBX1) (human)	0.00950062	0.10039	0	0	20.3255	94.6434	SMAD3;CUL1
BP-SMAD complex (human)	0.0249653	0.148163	0	0	10.1612	37.4974	KLF10;BACH1
URI complex (Unconventional prefoldin RPB5 Interactor) (human)	0.0314298	0.148163	0	0	8.70911	30.1335	CUL1;STAP1
SNX complex (SNX2), oligomeric (human)	0.0318498	0.148163	0	0	19363	66738.9	SNX2
TALL1 homo-oligomer complex (human)	0.0318498	0.148163	0	0	19363	66738.9	TNFSF13B
KSR1 homooligomer complex (human)	0.0318498	0.148163	0	0	19363	66738.9	KSR1
Isocitrate dehydrogenase, cytoplasmic (human)	0.0318498	0.148163	0	0	19363	66738.9	IDH1
Delta1 homodimer complex (human)	0.0318498	0.148163	0	0	19363	66738.9	DLL1
ADRB2 homodimer complex (human)	0.0318498	0.148163	0	0	19363	66738.9	ADRB2
SWI-SNF chromatin remodeling-related-BRCA1 complex (human)	0.0460468	0.148163	0	0	6.77305	20.8481	ARID1B;SMARCA2
TNF-alpha/NF-kappa B signaling complex (CHUK, BTRC, NFKB2, PPP6C, REL, CUL1, IKBKE, SAPS2, SAPS1, ANKRD28, RELA, SKP1) (human)	0.054115	0.148163	0	0	6.09543	17.7782	ANKRD28;CUL1
BAF complex (human)	0.0626371	0.148163	0	0	5.54102	15.3508	ARID1B;SMARCA2
BCL6-HDAC5 complex (human)	0.0626869	0.148163	0	0	30.4434	84.3161	HDAC5
6S-nuclear aryl hydrocarbon (Ah) receptor ligand-activated complex (mouse)	0.0626869	0.148163	0	0	30.4434	84.3161	AHR
PLC-gamma-2-SLP-76 complex (human)	0.0626869	0.148163	0	0	30.4434	84.3161	PLCG2
PLC-gamma-2-LAT complex (human)	0.0626869	0.148163	0	0	30.4434	84.3161	PLCG2
SEMA4A-PlexinD1 complex (human)	0.0626869	0.148163	0	0	30.4434	84.3161	PLXND1
Axin-SMAD3 complex (human)	0.0626869	0.148163	0	0	30.4434	84.3161	SMAD3
Psd3-Actn1 complex (mouse)	0.0626869	0.148163	0	0	30.4434	84.3161	ACTN1
MAD-MAX complex (human)	0.0626869	0.148163	0	0	30.4434	84.3161	MXD1
MIRO2-Milton complex (human)	0.0626869	0.148163	0	0	30.4434	84.3161	TRAK1
CCND2-CDK4 complex (human)	0.0626869	0.148163	0	0	30.4434	84.3161	CCND2
CCND2-CDK6 complex (human)	0.0626869	0.148163	0	0	30.4434	84.3161	CCND2
POSH-AKT2 complex (human)	0.0626869	0.148163	0	0	30.4434	84.3161	SH3RF1
POSH-MLK3 complex (human)	0.0626869	0.148163	0	0	30.4434	84.3161	SH3RF1
FOXO3-PCAF complex, oxidative stress stimulated (human)	0.0626869	0.148163	0	0	30.4434	84.3161	FOXO3
LMO4-CREB complex (human)	0.0626869	0.148163	0	0	30.4434	84.3161	LMO4
TGF-beta receptor (mouse)	0.0626869	0.148163	0	0	30.4434	84.3161	TGFBR1
SMAD3-SKI complex (human)	0.0626869	0.148163	0	0	30.4434	84.3161	SMAD3
SMAD3-VDR complex (mouse)	0.0626869	0.148163	0	0	30.4434	84.3161	SMAD3
Ship-Shc complex, IL-3 stimulated (mouse)	0.0626869	0.148163	0	0	30.4434	84.3161	INPP5D
Gata1-Gfi1b complex (mouse)	0.0626869	0.148163	0	0	30.4434	84.3161	GFI1B
MKP3-CK2alpha complex (mouse)	0.0626869	0.148163	0	0	30.4434	84.3161	DUSP6
Smad3-Smad4 complex (mouse)	0.0626869	0.148163	0	0	30.4434	84.3161	SMAD3
Vezf1-p68RacGap complex (mouse)	0.0626869	0.148163	0	0	30.4434	84.3161	ARHGAP22
CREBBP-SMAD3 hexameric complex (human)	0.0626869	0.148163	0	0	30.4434	84.3161	SMAD3
ITGA6-ITGB4 complex (human)	0.0626869	0.148163	0	0	30.4434	84.3161	ITGA6
Mlx-Mad1 complex (mouse)	0.0626869	0.148163	0	0	30.4434	84.3161	MXD1
Affixin-actinin(alpha) complex (human)	0.0626869	0.148163	0	0	30.4434	84.3161	ACTN1
ITGA5-ITGB4 complex (human)	0.0626869	0.148163	0	0	30.4434	84.3161	ITGA5
ITGA6-ITGB1 complex (human)	0.0626869	0.148163	0	0	30.4434	84.3161	ITGA6
ITGB1-ITGA9 complex (human)	0.0626869	0.148163	0	0	30.4434	84.3161	ITGA9
BKCA-beta2AR complex (human)	0.0626869	0.148163	0	0	30.4434	84.3161	ADRB2
Lab-Grb2 complex, BCR stimulated (mouse)	0.0626869	0.148163	0	0	30.4434	84.3161	LAT2
HGF-Met complex (human)	0.0626869	0.148163	0	0	30.4434	84.3161	HGF
FOXO3-SIRT1 complex, oxidative stress stimulated (human)	0.0626869	0.148163	0	0	30.4434	84.3161	FOXO3
FOXO3-TP53 complex, oxidative stress stimulated (human)	0.0626869	0.148163	0	0	30.4434	84.3161	FOXO3
C/EBPalpha-HNF6 complex (human)	0.0626869	0.148163	0	0	30.4434	84.3161	CEBPA
Prune-Gelsolin complex (human)	0.0626869	0.148163	0	0	30.4434	84.3161	GSN
Ubiquitin E3 ligase (CHEK1, CUL1) (human)	0.0626869	0.148163	0	0	30.4434	84.3161	CUL1
ELMO1-DOCK1 complex (human)	0.0626869	0.148163	0	0	30.4434	84.3161	ELMO1
ELMO1-DOCK2 complex (human)	0.0626869	0.148163	0	0	30.4434	84.3161	ELMO1
Ripk2-Nod2 complex (mouse)	0.0626869	0.148163	0	0	30.4434	84.3161	RIPK2
Grancalcin-sorcin complex (human)	0.0626869	0.148163	0	0	30.4434	84.3161	GCA
EGR-EP300 complex (human)	0.0626869	0.148163	0	0	30.4434	84.3161	EGR1
SERPINA3-CTSG complex (human)	0.0626869	0.148163	0	0	30.4434	84.3161	CTSG
SERPINA1-CTSG complex (human)	0.0626869	0.148163	0	0	30.4434	84.3161	CTSG
BRCA1-SMAD3 complex (human)	0.0626869	0.148163	0	0	30.4434	84.3161	SMAD3
Isl1-Jak1-Stat3 complex (mouse)	0.0925432	0.148163	0	0	15.2209	36.227	JAK1
SHARP-CtBP complex (human)	0.0925432	0.148163	0	0	15.2209	36.227	CTBP2
BAR-BCL2-CASP8 complex (human)	0.0925432	0.148163	0	0	15.2209	36.227	BCL2
SNX complex (SNX1a, SNX2, SNX4) (human)	0.0925432	0.148163	0	0	15.2209	36.227	SNX2
nNos-Capon-Dexras1 complex (mouse)	0.0925432	0.148163	0	0	15.2209	36.227	RASD1
NuMA-LGN-G-alpha-i-1 complex (human)	0.0925432	0.148163	0	0	15.2209	36.227	GNAI1
Ternary complex (LRRC7, CAMK2a, ACTN4) (human)	0.0925432	0.148163	0	0	15.2209	36.227	ACTN4
Itga9-Itgb1-Thbs1 complex (mouse)	0.0925432	0.148163	0	0	15.2209	36.227	ITGA9
ITGA9-ITGB1-VEGFC complex (human)	0.0925432	0.148163	0	0	15.2209	36.227	ITGA9
ITGA9-ITGB1-VEGFA complex (human)	0.0925432	0.148163	0	0	15.2209	36.227	ITGA9
ITGA9-ITGB1-ADAM8 complex (human)	0.0925432	0.148163	0	0	15.2209	36.227	ITGA9
TGF-beta receptor II-TGF-beta receptor I-TGF-beta3 complex (human)	0.0925432	0.148163	0	0	15.2209	36.227	TGFBR1
Complexin complex (STX3, CPLX1, CPLX3) (human)	0.0925432	0.148163	0	0	15.2209	36.227	STX3
Ubiquitin E3 ligase (Fbxl20, Skp1, Cul1) (mouse)	0.0925432	0.148163	0	0	15.2209	36.227	CUL1
Death-inducing signaling complex DISC (type I cells associated), stimulated (human)	0.0925432	0.148163	0	0	15.2209	36.227	FAS
OGT-TRAK1-TRAK2 complex (human)	0.0925432	0.148163	0	0	15.2209	36.227	TRAK1
Mad-Max-mSin3a complex (mouse)	0.0925432	0.148163	0	0	15.2209	36.227	MXD1
Mad-Max-mSin3B complex (mouse)	0.0925432	0.148163	0	0	15.2209	36.227	MXD1
MAD1-mSin3A-HDAC2 complex (human)	0.0925432	0.148163	0	0	15.2209	36.227	MXD1
PINK1-MIRO2-Milton complex (human)	0.0925432	0.148163	0	0	15.2209	36.227	TRAK1
FAS-FADD-CASP10 complex (human)	0.0925432	0.148163	0	0	15.2209	36.227	FAS
FE65-TSHZ3-HDAC1 complex (human)	0.0925432	0.148163	0	0	15.2209	36.227	TSHZ3
CAND1-CUL1-RBX1 complex (human)	0.0925432	0.148163	0	0	15.2209	36.227	CUL1
ARF-Mule complex (human)	0.0925432	0.148163	0	0	15.2209	36.227	CDKN2A
Ksr1-PP2A core enzyme complex (Ppp2r1a, Ppp2ca), untreated (mouse)	0.0925432	0.148163	0	0	15.2209	36.227	KSR1
Ubiquitin E3 ligase (SKP1A, BTRC, CUL1) (human)	0.0925432	0.148163	0	0	15.2209	36.227	CUL1
SNARE complex (Stx4, Vamp8, Snap23) (mouse)	0.0925432	0.148163	0	0	15.2209	36.227	VAMP8
ITGA9-ITGB1-SPP1 complex (human)	0.0925432	0.148163	0	0	15.2209	36.227	ITGA9
ITGA5-ITGB1-SPP1 complex (human)	0.0925432	0.148163	0	0	15.2209	36.227	ITGA5
Itgax-Itgb2-Icam4 complex (mouse)	0.0925432	0.148163	0	0	15.2209	36.227	ICAM4
ITGA2B-ITGB3-ICAM4 complex (human)	0.0925432	0.148163	0	0	15.2209	36.227	ICAM4
Ubiquitin E3 ligase (H2AFY, SPOP, CUL3) (human)	0.0925432	0.148163	0	0	15.2209	36.227	H2AFY
MKK4-ARRB2-ASK1 complex (human)	0.0925432	0.148163	0	0	15.2209	36.227	MAP3K5
Cdk5-c-Abl-Cables complex (mouse)	0.0925432	0.148163	0	0	15.2209	36.227	CABLES1
TGF-beta-receptor-PAR6 complex (human)	0.0925432	0.148163	0	0	15.2209	36.227	TGFBR1
G protein complex (Hdac5, Gnb1, Gng2) (mouse)	0.0925432	0.148163	0	0	15.2209	36.227	HDAC5
G protein complex (Btk, Gng2, Gnb1) (mouse)	0.0925432	0.148163	0	0	15.2209	36.227	BTK
PIAS3-SMAD3-P300 complex (human)	0.0925432	0.148163	0	0	15.2209	36.227	SMAD3
Shc-Ship-Grb2 complex, IL-3 stimulated (mouse)	0.0925432	0.148163	0	0	15.2209	36.227	INPP5D
SMAD3-SKI-NCOR complex (human)	0.0925432	0.148163	0	0	15.2209	36.227	SMAD3
Ubiquitin E3 ligase (SKP1A, FBXW2, CUL1) (human)	0.0925432	0.148163	0	0	15.2209	36.227	CUL1
IKK-alpha--ER-alpha-AIB1 complex (human)	0.0925432	0.148163	0	0	15.2209	36.227	NCOA3
ULBP1-KLRK1-HCST complex (human)	0.0925432	0.148163	0	0	15.2209	36.227	HCST
ITGAM-ITGB2-CD11 complex (human)	0.0925432	0.148163	0	0	15.2209	36.227	ITGAM
MAML2-RBP-Jkappa-Notch3 complex (mouse)	0.0925432	0.148163	0	0	15.2209	36.227	MAML2
MAML3-RBP-Jkappa-Notch3 complex (mouse)	0.0925432	0.148163	0	0	15.2209	36.227	MAML3
Ubiquitin E3 ligase (CDC34, CUL1, RBX1) (human)	0.0925432	0.148163	0	0	15.2209	36.227	CUL1
SCAMP1-SCAMP2-SCAMP3 complex (human)	0.0925432	0.148163	0	0	15.2209	36.227	SCAMP2
Ubiquitin E3 ligase (Fbxo15, Cul1, Skp1a) (mouse)	0.0925432	0.148163	0	0	15.2209	36.227	CUL1
SMN complex (GEMIN6,7, UNRIP), SMN-independent intermediate (human)	0.0925432	0.148163	0	0	15.2209	36.227	GEMIN7
BRCA1-LMO4-CTIP complex (human)	0.0925432	0.148163	0	0	15.2209	36.227	LMO4
Traf6-p62-aPKC complex, RANK-L stimulated (mouse)	0.0925432	0.148163	0	0	15.2209	36.227	SQSTM1
SKI-SMAD3-SMAD4 pentameric complex (human)	0.0925432	0.148163	0	0	15.2209	36.227	SMAD3
CREBBP-SMAD3-SMAD4 pentameric complex (human)	0.0925432	0.148163	0	0	15.2209	36.227	SMAD3
ITGA6-ITGB4-CD151 complex (human)	0.0925432	0.148163	0	0	15.2209	36.227	ITGA6
ITGA6-ITGB4-FYN complex (human)	0.0925432	0.148163	0	0	15.2209	36.227	ITGA6
ITGA6-ITGB4-LAMA5 complex (human)	0.0925432	0.148163	0	0	15.2209	36.227	ITGA6
Kinase-scaffold-phosphatase complex, PKA-AKAP79-CaN (human)	0.0925432	0.148163	0	0	15.2209	36.227	PPP3CA
ITGAV-ITGB5-ICAM4 complex (human)	0.0925432	0.148163	0	0	15.2209	36.227	ICAM4
Itgav-Itgb3-Gsn complex (mouse)	0.0925432	0.148163	0	0	15.2209	36.227	GSN
ABIN2-NFKB1-MAP3K8 complex (human)	0.0925432	0.148163	0	0	15.2209	36.227	MAP3K8
ITGA5-ITGB1-ADAM15 complex (human)	0.0925432	0.148163	0	0	15.2209	36.227	ITGA5
Itga-Itgb1-Ppap2b complex (mouse)	0.0925432	0.148163	0	0	15.2209	36.227	ITGA5
ITGA6-ITGB1-CD151 complex (human)	0.0925432	0.148163	0	0	15.2209	36.227	ITGA6
Ubiquitin E3 ligase (SKP1A, SKP2, CUL1) (human)	0.0925432	0.148163	0	0	15.2209	36.227	CUL1
p34(SEI-1)-CDK4-CyclinD2 complex (human)	0.0925432	0.148163	0	0	15.2209	36.227	CCND2
Trip(Br2)-Dp1-E2F1 complex (mouse)	0.0925432	0.148163	0	0	15.2209	36.227	SERTAD2
ITGA6-ITGB1-CYR61 complex (human)	0.0925432	0.148163	0	0	15.2209	36.227	ITGA6
ITGA9-ITGB1-ADAM9 complex (human)	0.0925432	0.148163	0	0	15.2209	36.227	ITGA9
ITGA9-ITGB1-VCAM1 complex (human)	0.0925432	0.148163	0	0	15.2209	36.227	ITGA9
p19-Cdk4-cyclinD2 complex (mouse)	0.0925432	0.148163	0	0	15.2209	36.227	CCND2
ITGA9-ITGB1-TNC complex (human)	0.0925432	0.148163	0	0	15.2209	36.227	ITGA9
ITGA9-ITGB1-ADAM15 complex (human)	0.0925432	0.148163	0	0	15.2209	36.227	ITGA9
ITGA9-ITGB1-FIGF complex (human)	0.0925432	0.148163	0	0	15.2209	36.227	ITGA9
SMARCA2/BRM-BAF57-MECP2 complex (human)	0.0925432	0.148163	0	0	15.2209	36.227	SMARCA2
ITGA9-ITGB1-ADAM12 complex (human)	0.0925432	0.148163	0	0	15.2209	36.227	ITGA9
ELK1-SRF-ELK3 complex (human)	0.0925432	0.148163	0	0	15.2209	36.227	ELK3
BKCA-beta2AR-AKAP79 signaling complex (human)	0.0925432	0.148163	0	0	15.2209	36.227	ADRB2
Smarcb1/Ini1-Smarca2-Mecp2 complex (mouse)	0.0925432	0.148163	0	0	15.2209	36.227	SMARCA2
CFTR-NHERF-beta(2)AR signaling complex (human)	0.0925432	0.148163	0	0	15.2209	36.227	ADRB2
Slam-SAP-SHIP complex (mouse)	0.0925432	0.148163	0	0	15.2209	36.227	INPP5D
c-Myc-Max-Arf complex (mouse)	0.0925432	0.148163	0	0	15.2209	36.227	CDKN2A
SNARE complex (Vti1b, Stx6, Stx7) (mouse)	0.0925432	0.148163	0	0	15.2209	36.227	STX7
ERG-JUN-FOS DNA-protein complex (human)	0.0925432	0.148163	0	0	15.2209	36.227	FOS
ETS2-FOS-JUN complex (human)	0.0925432	0.148163	0	0	15.2209	36.227	FOS
SMAD3-SMAD4-CTCF protein-DNA complex (human)	0.0925432	0.148163	0	0	15.2209	36.227	SMAD3
SMAD3-SMAD4-SP1 complex (human)	0.0925432	0.148163	0	0	15.2209	36.227	SMAD3
SMAD3-SMAD4-cJUN complex (human)	0.0925432	0.148163	0	0	15.2209	36.227	SMAD3
MMP-9-TIMP-1-LRP complex (human)	0.0925432	0.148163	0	0	15.2209	36.227	TIMP1
MR-UBC9-SRC1 complex (human)	0.0925432	0.148163	0	0	15.2209	36.227	PPP3CA
ELMO1-DOCK1-RAC1 complex (human)	0.0925432	0.148163	0	0	15.2209	36.227	ELMO1
ELMO1-DOCK1-CRKII complex (human)	0.0925432	0.148163	0	0	15.2209	36.227	ELMO1
SMAD3-SMAD4-FOXO1 complex (human)	0.0925432	0.148163	0	0	15.2209	36.227	SMAD3
SMAD3-SMAD4-FOXO4 complex (human)	0.0925432	0.148163	0	0	15.2209	36.227	SMAD3
ITGA6-ITGB4-CD9 complex (human)	0.0925432	0.148163	0	0	15.2209	36.227	ITGA6
SNARE complex (VAMP3, VAMP4, STX16) (human)	0.0925432	0.148163	0	0	15.2209	36.227	VAMP3
SNARE complex (VAMP3, STX6, VTI1A) (human)	0.0925432	0.148163	0	0	15.2209	36.227	VAMP3
BRCA1 B complex (human)	0.0925432	0.148163	0	0	15.2209	36.227	BACH1
Class C Vps complex (VPS11, VPS18, STX7) (human)	0.0925432	0.148163	0	0	15.2209	36.227	STX7
TIF1gamma-SMAD2-SMAD3 complex (human)	0.0925432	0.148163	0	0	15.2209	36.227	SMAD3
SMAD4-SMAD2-SMAD3 complex (human)	0.0925432	0.148163	0	0	15.2209	36.227	SMAD3
IKB(epsilon)-RELA-cREL complex (human)	0.0925432	0.148163	0	0	15.2209	36.227	NFKBIE
ITGA5-ITGB1-CAL4A3 complex (human)	0.0925432	0.148163	0	0	15.2209	36.227	ITGA5
Serine-palmitoyltransferase (SPT) complex (human)	0.0925432	0.148163	0	0	15.2209	36.227	SPTLC2
CALM1-FKBP38-BCL2 complex (human)	0.0925432	0.148163	0	0	15.2209	36.227	BCL2
PLCB1-PARD3-PARD6A complex (human)	0.0925432	0.148163	0	0	15.2209	36.227	PLCB1
Ubiquitin E3 ligase (CUL1, RBX1, SKP1A) (human)	0.0925432	0.148163	0	0	15.2209	36.227	CUL1
ITGA5-ITGB3-COL6A3 complex (human)	0.0925432	0.148163	0	0	15.2209	36.227	ITGA5
Fgr-Pyk2-p190RhoGap complex (mouse)	0.0925432	0.148163	0	0	15.2209	36.227	PTK2B
PLC-gamma-1-Lab-Blnk complex, BCR stimulated (mouse)	0.0925432	0.148163	0	0	15.2209	36.227	LAT2
Grb2-Lab-Blnk complex, BCR stimulated (mouse)	0.0925432	0.148163	0	0	15.2209	36.227	LAT2
Multisubunit ACTR coactivator complex (human)	0.12145	0.153385	0	0	10.1468	21.3919	NCOA3
Ubiquitin E3 ligase (SKP1A, SKP2, CUL1, RBX1) (human)	0.12145	0.153385	0	0	10.1468	21.3919	CUL1
Ubiquitin E3 ligase (FBXW11, SKP1A, CUL1, RBX1) (human)	0.12145	0.153385	0	0	10.1468	21.3919	CUL1
9S-cytosolic aryl hydrocarbon (Ah) receptor non-ligand activated complex (mouse)	0.12145	0.153385	0	0	10.1468	21.3919	AHR
SNX complex (SNX1a, SNX2, SNX4, LEPR) (human)	0.12145	0.153385	0	0	10.1468	21.3919	SNX2
SNX complex (SNX1a, SNX2, SNX4, EGFR) (human)	0.12145	0.153385	0	0	10.1468	21.3919	SNX2
SNX complex (SNX1,1a,2,4, PDGF receptor) (human)	0.12145	0.153385	0	0	10.1468	21.3919	SNX2
Tip5-Dnmt-Hdac1 complex (mouse)	0.12145	0.153385	0	0	10.1468	21.3919	DNMT3B
TIP5-DNMT-HDAC1 complex (human)	0.12145	0.153385	0	0	10.1468	21.3919	DNMT3B
Mdm2-P53 complex (mouse)	0.12145	0.153385	0	0	10.1468	21.3919	CDKN2A
E-box sequence-binding complex (human)	0.12145	0.153385	0	0	10.1468	21.3919	LMO2
SWAP complex (mouse)	0.12145	0.153385	0	0	10.1468	21.3919	SWAP70
Death induced signaling complex DISC (FAS, FADD, CASP8, CFLAR), membrane-associated, CD95L induced (human)	0.12145	0.153385	0	0	10.1468	21.3919	FAS
ActRIIA-ActRIB-Smad3-Arip1 complex (mouse)	0.12145	0.153385	0	0	10.1468	21.3919	SMAD3
FAS-FADD-CASP8-CASP10 complex (human)	0.12145	0.153385	0	0	10.1468	21.3919	FAS
Ksr1-PP2A holoenzyme complex (Ppp2r1a, Ppp2r2b, Ppp2ca), PDGF stimulated (mouse)	0.12145	0.153385	0	0	10.1468	21.3919	KSR1
Ksr1-CK2 complex (mouse)	0.12145	0.153385	0	0	10.1468	21.3919	KSR1
ITGA6-ITGB4-SHC1-GRB2 complex (human)	0.12145	0.153385	0	0	10.1468	21.3919	ITGA6
KSR1-RAF1-MEK complex (human)	0.12145	0.153385	0	0	10.1468	21.3919	KSR1
KSR1-BRAF-MEK complex (human)	0.12145	0.153385	0	0	10.1468	21.3919	KSR1
Ksr1-Mek-Braf complex, EGF induced (mouse)	0.12145	0.153385	0	0	10.1468	21.3919	KSR1
IRF3-CBP complex (human)	0.12145	0.153385	0	0	10.1468	21.3919	CITED2
Ubiquitin E3 ligase (FBXW7, CUL1, SKP1A, RBX1) (human)	0.12145	0.153385	0	0	10.1468	21.3919	CUL1
Notch2(N-TM)-Notch2(N-EC)-Delta complex (human)	0.12145	0.153385	0	0	10.1468	21.3919	DLL1
Neddylin ligase (FBXO11, SKP1, CUL1, RBX1) (human)	0.12145	0.153385	0	0	10.1468	21.3919	CUL1
TF-FVIIa-FXa-TFPI complex (human)	0.12145	0.153385	0	0	10.1468	21.3919	TFPI
Gata1-Tal1-Tcf3-Lmo2 complex (mouse)	0.12145	0.153385	0	0	10.1468	21.3919	LMO2
GALNS-lysosomal hydrolase 1.27 MDa complex (human)	0.12145	0.153385	0	0	10.1468	21.3919	CTSA
SMAD3-HEF1-APC10-CDH1 complex (human)	0.12145	0.153385	0	0	10.1468	21.3919	SMAD3
PML-SMAD2/3-SARA complex (human)	0.12145	0.153385	0	0	10.1468	21.3919	SMAD3
Ubiquitin E3 ligase (FBXO18, SKP1A, CUL1, RBX1) (human)	0.12145	0.153385	0	0	10.1468	21.3919	CUL1
Ubiquitin E3 ligase (NIPA, SKP1A, CUL1, RBX1) (human)	0.12145	0.153385	0	0	10.1468	21.3919	CUL1
Ubiquitin E3 ligase (Fbxo32, Skp1a, Cul1, Rbx1) (mouse)	0.12145	0.153385	0	0	10.1468	21.3919	CUL1
Ubiquitin E3 ligase (Fbxo2, Skp1a, Cul1, Rbx1) (mouse)	0.12145	0.153385	0	0	10.1468	21.3919	CUL1
Limd1-p62-Traf6-Prkcz complex (mouse)	0.12145	0.153385	0	0	10.1468	21.3919	SQSTM1
LMO4-BRCA1-CTIP-LDB1 complex (human)	0.12145	0.153385	0	0	10.1468	21.3919	LMO4
ITGAV-ITGB8-MMP14-TGFB1 complex (human)	0.12145	0.153385	0	0	10.1468	21.3919	TGFB1
Xin-Cdh2-Ctnnb1-Ctnnd1 complex (mouse)	0.12145	0.153385	0	0	10.1468	21.3919	CTNND1
SMAD3-cSKI-SIN3A-HDAC1 complex (human)	0.12145	0.153385	0	0	10.1468	21.3919	SMAD3
TDT-TDIF2-core-histone complex (human)	0.12145	0.153385	0	0	10.1468	21.3919	H2AFY
ITGAV-ITGB3-PXN-PTK2b complex (human)	0.12145	0.153385	0	0	10.1468	21.3919	PTK2B
ITGA5-ITGB1-FN1-TGM2 complex (human)	0.12145	0.153385	0	0	10.1468	21.3919	ITGA5
beta(1)-AR receptosome (ADRB1-SAP97-AKAP79-PRKAR2A) (human)	0.12145	0.153385	0	0	10.1468	21.3919	ADRB1
FGFR2-c-Cbl-Lyn-Fyn complex (human)	0.12145	0.153385	0	0	10.1468	21.3919	LYN
p21(ras)GAP-Fyn-Lyn-Yes complex, thrombin stimulated (human)	0.12145	0.153385	0	0	10.1468	21.3919	LYN
CD20-LCK-LYN-FYN-p75/80 complex, (Raji human B cell line) (human)	0.12145	0.153385	0	0	10.1468	21.3919	LYN
Sam68-p85 P13K-IRS-1-IR signaling complex (human)	0.12145	0.153385	0	0	10.1468	21.3919	INSR
Ubiquitin E3 ligase (FBXO31, SKP1A, CUL1, RBX1) (human)	0.12145	0.153385	0	0	10.1468	21.3919	CUL1
JUND-FOSB-SMAD3-SMAD4 complex (human)	0.12145	0.153385	0	0	10.1468	21.3919	SMAD3
Ubiquitin E3 ligase (CRY1, SKP1A, CUL1, FBXL3) (human)	0.12145	0.153385	0	0	10.1468	21.3919	CUL1
Ubiquitin E3 ligase (CRY2, SKP1A, CUL1, FBXL3) (human)	0.12145	0.153385	0	0	10.1468	21.3919	CUL1
ITGA5-ITGB1-FN-1-NOV complex (human)	0.12145	0.153385	0	0	10.1468	21.3919	ITGA5
Tumor necrosis factor receptor 1 signaling complex (human)	0.12145	0.153385	0	0	10.1468	21.3919	TNFRSF1A
Retromer complex (SNX1, SNX2, VPS35, VPS29, VPS26B) (human)	0.149437	0.176103	0	0	7.60967	14.4651	SNX2
SMAD3-E2F4/5-p107-DP1 complex (human)	0.149437	0.176103	0	0	7.60967	14.4651	SMAD3
Ubiquitin E3 ligase (SKP1A, SKP2, CUL1, CKS1B, RBX1) (human)	0.149437	0.176103	0	0	7.60967	14.4651	CUL1
MAP2K1-BRAF-RAF1-YWHAE-KSR1 complex (human)	0.149437	0.176103	0	0	7.60967	14.4651	KSR1
Rb-tal-1-E2A-Lmo2-Ldb1 complex (human)	0.149437	0.176103	0	0	7.60967	14.4651	LMO2
Ldb1-Lmo2-Gata-1-Tal1-E47 complex (mouse)	0.149437	0.176103	0	0	7.60967	14.4651	LMO2
SNARE complex (SNAP25, VAMP3, VAMP2, NAPB, STX13) (human)	0.149437	0.176103	0	0	7.60967	14.4651	VAMP3
Ubiquitin E3 ligase (NFKBIA, FBXW11, BTRC, CUL1, SKP1A) (human)	0.149437	0.176103	0	0	7.60967	14.4651	CUL1
Gamma-secretase-Delta1 complex (human)	0.149437	0.176103	0	0	7.60967	14.4651	DLL1
Ubiquitin E3 ligase (CDC34, NEDD8, BTRC, CUL1, SKP1A, RBX1) (human)	0.149437	0.176103	0	0	7.60967	14.4651	CUL1
AKAP250-PKA-PDE4D complex (human)	0.149437	0.176103	0	0	7.60967	14.4651	PDE4D
Retromer complex (SNX1, SNX2, VPS35, VPS29, VPS26A) (human)	0.149437	0.176103	0	0	7.60967	14.4651	SNX2
SWI/SNF chromatin-remodeling complex (human)	0.149437	0.176103	0	0	7.60967	14.4651	SMARCA2
CHUK-IQGAP2-AKAP8L-RELA-TNIP2 complex (human)	0.149437	0.176103	0	0	7.60967	14.4651	IQGAP2
REL-MAP3K8-RELA-TNIP2-PAPOLA complex (human)	0.149437	0.176103	0	0	7.60967	14.4651	MAP3K8
Kif3-cadherin-catenin complex (mouse)	0.149437	0.176103	0	0	7.60967	14.4651	CTNND1
PRKAC-AKAP5-ADRB1 complex (human)	0.149437	0.176103	0	0	7.60967	14.4651	ADRB1
GAA1-GPI8-PIGT-PIG-PIGS complex (human)	0.149437	0.176103	0	0	7.60967	14.4651	PIGK
Ubiquitin E3 ligase (AHR, ARNT, DDB1, TBL3, CUL4B, RBX1) (human)	0.176535	0.202027	0	0	6.08742	10.557	AHR
Ksr1-Mek-Braf-Erk complex, EGF induced (mouse)	0.176535	0.202027	0	0	6.08742	10.557	KSR1
VEGF transcriptional complex (human)	0.176535	0.202027	0	0	6.08742	10.557	CITED2
SMAD3/4-E2F4/5-p107-DP1 complex (human)	0.176535	0.202027	0	0	6.08742	10.557	SMAD3
WIP-WASp-actin-myosin-IIa complex (human)	0.176535	0.202027	0	0	6.08742	10.557	ACTA2
ITGA6-ITGB4-Laminin10/12 complex (human)	0.176535	0.202027	0	0	6.08742	10.557	ITGA6
SWI/SNF chromatin-remodeling complex (Mecp2, Smarc) (mouse)	0.176535	0.202027	0	0	6.08742	10.557	SMARCA2
BRCA1-BARD1-BACH1-DNA damage complex I (human)	0.176535	0.202027	0	0	6.08742	10.557	BACH1
TNF-alpha/NF-kappa B signaling complex 5 (human)	0.188573	0.215027	0	0	2.64841	4.41826	CUL1;IQGAP2
DNMT3B complex (human)	0.20277	0.227131	0	0	5.07259	8.09425	DNMT3B
SNARE complex (VAMP2, SNAP25, STX1a, STX3, CPLX1, CPLX3, CPLX4) (human)	0.20277	0.227131	0	0	5.07259	8.09425	STX3
Caveolar macromolecular signaling complex (mouse)	0.20277	0.227131	0	0	5.07259	8.09425	ADRB2
SWI/SNF-related complex (mouse)	0.20277	0.227131	0	0	5.07259	8.09425	SMARCA2
SRC-3 complex (human)	0.20277	0.227131	0	0	5.07259	8.09425	NCOA3
p27-cyclinE-Cdk2 - Ubiquitin E3 ligase (SKP1A, SKP2, CUL1, CKS1B, RBX1) complex (human)	0.22817	0.248557	0	0	4.34771	6.42445	CUL1
BCOR complex (human)	0.22817	0.248557	0	0	4.34771	6.42445	RYBP
Brain-derived dystrobrevin-syntrophin complex (mouse)	0.22817	0.248557	0	0	4.34771	6.42445	SNTB1
SMN containing complex (human)	0.22817	0.248557	0	0	4.34771	6.42445	LGALS1
Kinase maturation complex 2 (human)	0.22817	0.248557	0	0	4.34771	6.42445	TBK1
Ubiquitin E3 ligase (CSN1, CSN8, HRT1, SKP1, SKP2, CUL1, CUL2, CUL3) (human)	0.22817	0.248557	0	0	4.34771	6.42445	CUL1
NuA4/Tip60-HAT complex B (human)	0.22817	0.248557	0	0	4.34771	6.42445	EPC1
BRCA1-BARD1-BACH1-DNA damage complex II (human)	0.22817	0.248557	0	0	4.34771	6.42445	BACH1
Sarcoglycan-sarcospan-syntrophin-dystrobrevin complex (mouse)	0.252763	0.274404	0	0	3.80405	5.23172	SNTB1
Ksr1 complex (Ksr1, Mek, 14-3-3), unstimulated (mouse)	0.276573	0.293223	0	0	3.3812	4.34579	KSR1
B-Ksr1-MEK-MAPK-14-3-3 complex (mouse)	0.276573	0.293223	0	0	3.3812	4.34579	KSR1
EBAFb complex (human)	0.276573	0.293223	0	0	3.3812	4.34579	ARID1B
SRCAP-associated chromatin remodeling complex (human)	0.276573	0.293223	0	0	3.3812	4.34579	EAF2
Dystrophin-sarcoglycan-syntrophin complex, skeletal muscle (mouse)	0.276573	0.293223	0	0	3.3812	4.34579	SNTB1
TNF-alpha/NF-kappa B signaling complex 10 (human)	0.276573	0.293223	0	0	3.3812	4.34579	TBK1
DMAP1-associated complex (human)	0.276573	0.293223	0	0	3.3812	4.34579	EPC1
Ksr1 complex (Ksr1, Mek, 14-3-3, Mapk), EGF stimulated (mouse)	0.299626	0.316605	0	0	3.04292	3.6674	KSR1
Ksr1-CK2-MEK-14-3-3 complex, PDGF treated (mouse)	0.321945	0.334612	0	0	2.76615	3.13509	KSR1
TNF-alpha/NF-kappa B signaling complex (CHUK, KPNA3, NFKB2, NFKBIB, REL, IKBKG, NFKB1, NFKBIE, RELB, NFKBIA, RELA, TNIP2) (human)	0.321945	0.334612	0	0	2.76615	3.13509	NFKBIE
P2X7 receptor signalling complex (human)	0.321945	0.334612	0	0	2.76615	3.13509	ACTN4
CHUK-NFKB2-REL-IKBKG-SPAG9-NFKB1-NFKBIE-COPB2-TNIP1-NFKBIA-RELA-TNIP2 complex (human)	0.321945	0.334612	0	0	2.76615	3.13509	NFKBIE
BRM-SIN3A-HDAC complex (human)	0.321945	0.334612	0	0	2.76615	3.13509	SMARCA2
LSD1 complex (human)	0.343554	0.355904	0	0	2.53551	2.70897	RREB1
WINAC complex (human)	0.364475	0.376347	0	0	2.34035	2.36211	SMARCA2
BRM-SIN3A complex (human)	0.384731	0.394692	0	0	2.17307	2.07574	SMARCA2
NuA4/Tip60-HAT complex A (human)	0.384731	0.394692	0	0	2.17307	2.07574	EPC1
SMN complex (human)	0.404342	0.410822	0	0	2.02809	1.83643	GEMIN7
NuA4/Tip60 HAT complex (human)	0.404342	0.410822	0	0	2.02809	1.83643	EPC1
TRAP complex (human)	0.404342	0.410822	0	0	2.02809	1.83643	THRA
TNF-alpha/Nf-kappa B signaling complex (RPL6, RPL30, RPS13, CHUK, DDX3X, NFKB2, NFKBIB, REL, IKBKG, NFKB1, MAP3K8, RELB, GLG1, NFKBIA, RELA, TNIP2, GTF2I) (human)	0.423329	0.428739	0	0	1.90124	1.63432	MAP3K8
Emerin complex 52 (human)	0.525211	0.530229	0	0	1.38229	0.890133	THRA
RNA polymerase II complex, chromatin structure modifying (human)	0.555008	0.558532	0	0	1.26697	0.745957	SMARCA2
ALL-1 supercomplex (human)	0.596239	0.598125	0	0	1.12602	0.582281	SMARCA2
Nop56p-associated pre-rRNA complex (human)	0.965785	0.965785	0	0	0.29401	0.0102357	ACTA2

## Sheet: non ETP-ALL specific complexes
Term	P-value	Adjusted P-value	Old P-value	Old Adjusted P-value	Odds Ratio	Combined Score	Genes
Slam-SAP-FynT complex (mouse)	2.13712e-05	0.00439492	0	0	58332	627271	SH2D1A;FYN;SLAMF1
Mitotic checkpoint complex (MCC) (human)	8.37128e-05	0.00439492	0	0	105.477	990.234	CDC20;BUB1B;MAD2L1
Cd3d-Cd3g-Cd3e-Cd247 complex (mouse)	8.37128e-05	0.00439492	0	0	105.477	990.234	CD3G;CD247;CD3E
Cd3g-Cd3e-Cd247-Canx complex (mouse)	8.37128e-05	0.00439492	0	0	105.477	990.234	CD3G;CD247;CD3E
Cell cycle kinase complex CDC2 (human)	0.000401422	0.0101255	0	0	35.1555	274.934	CCNB2;CCNB1;CDK1
Car-Jam3 complex (mouse)	0.00077147	0.0101255	0	0	38888	278719	CXADR;JAM3
CD8A-LCK complex (human)	0.00077147	0.0101255	0	0	38888	278719	LCK;CD8A
ESPL1-CDC2 complex (human)	0.00077147	0.0101255	0	0	38888	278719	ESPL1;CDK1
Rag1-Rag2 protein-DNA complex (mouse)	0.00077147	0.0101255	0	0	38888	278719	RAG2;RAG1
Slam-SAP complex (mouse)	0.00077147	0.0101255	0	0	38888	278719	SH2D1A;SLAMF1
MAD2-CDC20 complex (human)	0.00077147	0.0101255	0	0	38888	278719	CDC20;MAD2L1
Cd3g-Cd3e complex (mouse)	0.00077147	0.0101255	0	0	38888	278719	CD3G;CD3E
RAG1-RAG2 tetramer complex (human)	0.00077147	0.0101255	0	0	38888	278719	RAG2;RAG1
CCNB2-CDC2 complex (human)	0.00077147	0.0101255	0	0	38888	278719	CCNB2;CDK1
CCNB1-CDC2 complex (human)	0.00077147	0.0101255	0	0	38888	278719	CCNB1;CDK1
CDC2-CCNA2 complex (human)	0.00077147	0.0101255	0	0	38888	278719	CCNA2;CDK1
SLP-76-PLC-gamma-1-ITK complex, alpha-TCR stimulated (human)	0.00227168	0.0190821	0	0	70.1913	427.271	ITK;PLCG1
CRM1-Survivin-AuroraB mitotic complex (human)	0.00227168	0.0190821	0	0	70.1913	427.271	BIRC5;AURKB
RalBP1-CDC2-CCNB1 complex (human)	0.00227168	0.0190821	0	0	70.1913	427.271	CCNB1;CDK1
DNA ligase IV-condensin complex (human)	0.00227168	0.0190821	0	0	70.1913	427.271	LIG4;SMC2
Slam-SAP-SHIP complex (mouse)	0.00227168	0.0190821	0	0	70.1913	427.271	SH2D1A;SLAMF1
Chromosomal passenger complex CPC (INCENP, BIRC5, AURKB) (human)	0.00227168	0.0190821	0	0	70.1913	427.271	BIRC5;AURKB
CDC2-CCNB1-CCNF complex (human)	0.00227168	0.0190821	0	0	70.1913	427.271	CCNB1;CDK1
CDC2-CCNB1-PTCH1 complex (human)	0.00227168	0.0190821	0	0	70.1913	427.271	CCNB1;CDK1
CDC2-CCNA2-CDK2 complex (human)	0.00227168	0.0190821	0	0	70.1913	427.271	CCNA2;CDK1
LCK-SLP76-PLC-gamma-1-LAT complex, pervanadate-activated (human)	0.00445966	0.027545	0	0	35.0939	189.952	LCK;PLCG1
BIRC5-AURKB-INCENP-EVI5 complex (human)	0.00445966	0.027545	0	0	35.0939	189.952	BIRC5;AURKB
Chromosomal passenger complex CPC (INCENP, CDCA8, BIRC5, AURKB) (human)	0.00445966	0.027545	0	0	35.0939	189.952	BIRC5;AURKB
NDC80 kinetochore complex (human)	0.00445966	0.027545	0	0	35.0939	189.952	NUF2;NDC80
CD20-LCK-LYN-FYN-p75/80 complex, (Raji human B cell line) (human)	0.00445966	0.027545	0	0	35.0939	189.952	LCK;FYN
RasGAP-AURKA/AURKB-survivin complex (human)	0.00445966	0.027545	0	0	35.0939	189.952	BIRC5;AURKB
CDC2-PCNA-CCNB1-GADD45A complex (human)	0.00445966	0.027545	0	0	35.0939	189.952	CCNB1;CDK1
CDC2-PCNA-CCNB1-GADD45B complex (human)	0.00445966	0.027545	0	0	35.0939	189.952	CCNB1;CDK1
CDC2-PCNA-CCNB1-GADD45G complex (human)	0.00445966	0.027545	0	0	35.0939	189.952	CCNB1;CDK1
RC complex during G2/M-phase of cell cycle (human)	0.00496324	0.0297794	0	0	10.5429	55.9372	CCNA2;CCNB1;CDK1
Condensin I complex (human)	0.00729615	0.0403208	0	0	23.3947	115.112	NCAPG;SMC2
Condensin II (human)	0.00729615	0.0403208	0	0	23.3947	115.112	NCAPG2;SMC2
Rag1-Rag2-Ku70-Ku80 protein-DNA complex (mouse)	0.00729615	0.0403208	0	0	23.3947	115.112	RAG2;RAG1
Condensin I-PARP-1-XRCC1 complex (human)	0.0147658	0.0795079	0	0	14.0354	59.1654	NCAPG;SMC2
CEN complex (human)	0.0188933	0.09919	0	0	4.26241	16.9173	CENPM;KIF23;CENPO;CENPA
Molybdopterin synthase (human)	0.0277998	0.115867	0	0	19444	69662.5	MOCS2
Survivin homodimer complex (human)	0.0277998	0.115867	0	0	19444	69662.5	BIRC5
Cd247 homodimer complex (mouse)	0.0277998	0.115867	0	0	19444	69662.5	CD247
Cd3e homodimer complex (mouse)	0.0277998	0.115867	0	0	19444	69662.5	CD3E
ATM homodimer complex (human)	0.0277998	0.115867	0	0	19444	69662.5	ATM
CENP-A NAC-CAD complex (human)	0.0491383	0.115867	0	0	6.37775	19.2169	CENPM;CENPO
BCL6-HDAC4 complex (human)	0.0548283	0.115867	0	0	35.0324	101.718	HDAC4
Car-Lnx2 complex (mouse)	0.0548283	0.115867	0	0	35.0324	101.718	CXADR
HDAC4-ERK1 complex (human)	0.0548283	0.115867	0	0	35.0324	101.718	HDAC4
HDAC4-ERK2 complex (human)	0.0548283	0.115867	0	0	35.0324	101.718	HDAC4
Securin-separase complex (human)	0.0548283	0.115867	0	0	35.0324	101.718	ESPL1
ITK-SLP-76 complex, anti-TCR stimulated (human)	0.0548283	0.115867	0	0	35.0324	101.718	ITK
TRIM27-RB1 complex (human)	0.0548283	0.115867	0	0	35.0324	101.718	RB1
hRAD51C-hXRCC3 complex (human)	0.0548283	0.115867	0	0	35.0324	101.718	RAD51
CD28-transactivation complex (human)	0.0548283	0.115867	0	0	35.0324	101.718	CD28
CyclinB1-Cdc2 complex (mouse)	0.0548283	0.115867	0	0	35.0324	101.718	CDK1
CRM1-Survivin mitotic complex (human)	0.0548283	0.115867	0	0	35.0324	101.718	BIRC5
Cohesin complex, incomplete (Stag3, Sycp3) (mouse)	0.0548283	0.115867	0	0	35.0324	101.718	STAG3
PlexinA1-NRP1 complex (human)	0.0548283	0.115867	0	0	35.0324	101.718	PLXNA1
PlexinA1-PlexinB1 complex (mouse)	0.0548283	0.115867	0	0	35.0324	101.718	PLXNA1
DNA ligase IV-XRCC1 complex (human)	0.0548283	0.115867	0	0	35.0324	101.718	LIG4
TBPIP/HOP2-MND1 complex (human)	0.0548283	0.115867	0	0	35.0324	101.718	MND1
OCT1-OBF1-DNA complex (human)	0.0548283	0.115867	0	0	35.0324	101.718	POU2AF1
pRB-E2F-1 complex (human)	0.0548283	0.115867	0	0	35.0324	101.718	RB1
DNA ligase IV-XRCC4 complex (LX complex) (human)	0.0548283	0.115867	0	0	35.0324	101.718	LIG4
Succinyl-CoA synthetase, GDP-forming (human)	0.0548283	0.115867	0	0	35.0324	101.718	SUCLG2
Rb-HDAC1 complex (human)	0.0548283	0.115867	0	0	35.0324	101.718	RB1
ITGAV-ITGB5 complex (human)	0.0548283	0.115867	0	0	35.0324	101.718	ITGAV
ITGAV-ITGB6 complex (human)	0.0548283	0.115867	0	0	35.0324	101.718	ITGAV
PAR4-BACE1 complex (human)	0.0548283	0.115867	0	0	35.0324	101.718	PAWR
RB1(hypophosphorylated)-E2F4 complex (human)	0.0548283	0.115867	0	0	35.0324	101.718	RB1
ITGAV-ITGB1 complex (human)	0.0548283	0.115867	0	0	35.0324	101.718	ITGAV
RB1-TFAP2A complex (human)	0.0548283	0.115867	0	0	35.0324	101.718	RB1
p56(LCK)-CAML complex (human)	0.0548283	0.115867	0	0	35.0324	101.718	LCK
Cd2ap-Fyn complex (mouse)	0.0548283	0.115867	0	0	35.0324	101.718	FYN
S100A10-annexin 2 complex (mouse)	0.0548283	0.115867	0	0	35.0324	101.718	S100A10
CAP(C)-CAP(E) complex (human)	0.0548283	0.115867	0	0	35.0324	101.718	SMC2
ATM-NBS1 complex (human)	0.0548283	0.115867	0	0	35.0324	101.718	ATM
Lef1-Tle1 complex (mouse)	0.0548283	0.115867	0	0	35.0324	101.718	LEF1
ERAP1-ERAP2 complex (human)	0.0548283	0.115867	0	0	35.0324	101.718	ERAP1
RAD51-DMC1 complex (mouse)	0.0548283	0.115867	0	0	35.0324	101.718	RAD51
Par-3-p75NTR complex (mouse)	0.0548283	0.115867	0	0	35.0324	101.718	PARD3
ETS2-ETS1 complex (human)	0.0548283	0.115867	0	0	35.0324	101.718	ETS1
EDG1-HTR1D complex (human)	0.0548283	0.115867	0	0	35.0324	101.718	S1PR1
ITGAV-ITGB3 complex (human)	0.0548283	0.115867	0	0	35.0324	101.718	ITGAV
SCRIB-VANGL2 complex (human)	0.0548283	0.115867	0	0	35.0324	101.718	VANGL2
HTR1A-EDG1 complex (human)	0.0548283	0.115867	0	0	35.0324	101.718	S1PR1
BRCA1-RAD51 complex (human)	0.0548283	0.115867	0	0	35.0324	101.718	RAD51
CDK2-CCNA2 complex (human)	0.0548283	0.115867	0	0	35.0324	101.718	CCNA2
Notch1-p56lck-PI3K complex (human)	0.0811066	0.115867	0	0	17.5153	43.9983	LCK
PSD95-FYN-NR2A complex (human)	0.0811066	0.115867	0	0	17.5153	43.9983	FYN
PLC-gamma-1-LAT-c-CBL complex, OKT3 stimulated (human)	0.0811066	0.115867	0	0	17.5153	43.9983	PLCG1
FARP2-NRP1-PlexinA1 complex (human)	0.0811066	0.115867	0	0	17.5153	43.9983	PLXNA1
SLP-76-PLC-gamma-1-VAV complex, alpha-TCR stimulated (human)	0.0811066	0.115867	0	0	17.5153	43.9983	PLCG1
CEBPE-E2F1-RB1 complex (human)	0.0811066	0.115867	0	0	17.5153	43.9983	RB1
SEMA6D-PlexinA1-NRP1 complex (human)	0.0811066	0.115867	0	0	17.5153	43.9983	PLXNA1
Cohesin complex, incomplete (Stag3, Scp1, Ss181) (mouse)	0.0811066	0.115867	0	0	17.5153	43.9983	STAG3
Cohesin complex, incomplete (Sycp1, Crest/Ss18I1, Rec8) (mouse)	0.0811066	0.115867	0	0	17.5153	43.9983	REC8
PlexinA1-NRP1-SEMA3A complex (human)	0.0811066	0.115867	0	0	17.5153	43.9983	PLXNA1
CRMP-MICAL-PlexinA1 complex, induced by SEMA3A (human)	0.0811066	0.115867	0	0	17.5153	43.9983	PLXNA1
ITGAV-ITGB3-SLC3A2 complex (human)	0.0811066	0.115867	0	0	17.5153	43.9983	ITGAV
ITGAV-P2RY2-GNA12 complex (human)	0.0811066	0.115867	0	0	17.5153	43.9983	ITGAV
ITGB5-ITGAV-VTN complex (human)	0.0811066	0.115867	0	0	17.5153	43.9983	ITGAV
OCT1-OBF1-DNA-TLE1 complex (human)	0.0811066	0.115867	0	0	17.5153	43.9983	POU2AF1
Smooth muscle sarcoglycan complex SGC, beta-delta-zeta (mouse)	0.0811066	0.115867	0	0	17.5153	43.9983	SGCB
DNA ligase IV-XRCC4-AHNK complex (human)	0.0811066	0.115867	0	0	17.5153	43.9983	LIG4
DNA ligase IV-XRCC4-PNK complex (human)	0.0811066	0.115867	0	0	17.5153	43.9983	LIG4
DNA ligase IV-Xrcc4-DNA-protein kinase complex (mouse)	0.0811066	0.115867	0	0	17.5153	43.9983	LIG4
DNA ligase IV-XRCC4-XLF complex (human)	0.0811066	0.115867	0	0	17.5153	43.9983	LIG4
G protein complex (Hdac4, Gnb1, Gng2) (mouse)	0.0811066	0.115867	0	0	17.5153	43.9983	HDAC4
MAML2-RBP-Jkappa-Notch3 complex (mouse)	0.0811066	0.115867	0	0	17.5153	43.9983	NOTCH3
MAML3-RBP-Jkappa-Notch3 complex (mouse)	0.0811066	0.115867	0	0	17.5153	43.9983	NOTCH3
RB1-HDAC1-BRG1 complex (human)	0.0811066	0.115867	0	0	17.5153	43.9983	RB1
ITGA6-ITGB4-FYN complex (human)	0.0811066	0.115867	0	0	17.5153	43.9983	FYN
ITGAV-ITGB5-PLAUR complex (human)	0.0811066	0.115867	0	0	17.5153	43.9983	ITGAV
ITGAV-ITGB5-ICAM4 complex (human)	0.0811066	0.115867	0	0	17.5153	43.9983	ITGAV
ITGAV-ITGB5-ADAM9 complex (human)	0.0811066	0.115867	0	0	17.5153	43.9983	ITGAV
ITGAV-ITGB5-SPP1 complex (human)	0.0811066	0.115867	0	0	17.5153	43.9983	ITGAV
ITGAV-ITGB5-CYR61 complex (human)	0.0811066	0.115867	0	0	17.5153	43.9983	ITGAV
ITGB6-FYN-FN1 complex (human)	0.0811066	0.115867	0	0	17.5153	43.9983	FYN
ITGAV-ITGB6-SPP1 complex (human)	0.0811066	0.115867	0	0	17.5153	43.9983	ITGAV
ITGAV-ITGB6-TGFB3 complex (human)	0.0811066	0.115867	0	0	17.5153	43.9983	ITGAV
ITGB3-ITGAV-CD47 complex (human)	0.0811066	0.115867	0	0	17.5153	43.9983	ITGAV
ITGAV-ITGB3-SPP1 complex (human)	0.0811066	0.115867	0	0	17.5153	43.9983	ITGAV
ITGAV-ITGB3-ADAM15 complex (human)	0.0811066	0.115867	0	0	17.5153	43.9983	ITGAV
Itgav-Itgb3-Gsn complex (mouse)	0.0811066	0.115867	0	0	17.5153	43.9983	ITGAV
ITAGV-ITGB3-F11R complex (human)	0.0811066	0.115867	0	0	17.5153	43.9983	ITGAV
ITGAV-ITGB3-ADAM23 complex (human)	0.0811066	0.115867	0	0	17.5153	43.9983	ITGAV
ITGAV-ITGB3-COL4A3 complex (human)	0.0811066	0.115867	0	0	17.5153	43.9983	ITGAV
ITGAV-ITGB3-PPAP2b complex (human)	0.0811066	0.115867	0	0	17.5153	43.9983	ITGAV
ITGAV-ITGB3-EGFR complex (human)	0.0811066	0.115867	0	0	17.5153	43.9983	ITGAV
ITGAV-ITGB3-LAMA4 complex (human)	0.0811066	0.115867	0	0	17.5153	43.9983	ITGAV
Epo-R-PLC-gamma-TRPC2 complex (mouse)	0.0811066	0.115867	0	0	17.5153	43.9983	PLCG1
E2F1-p107-cyclinA complex (human)	0.0811066	0.115867	0	0	17.5153	43.9983	CCNA2
PKC-alpha-PLD1-PLC-gamma-2 signaling complex, lacritin stimulated (human)	0.0811066	0.115867	0	0	17.5153	43.9983	PRKCA
TRPV5-S100A10-annexin 2 complex (mouse)	0.0811066	0.115867	0	0	17.5153	43.9983	S100A10
MAF1 complex (human)	0.0811066	0.115867	0	0	17.5153	43.9983	RB1
RAB9-TIP47-MPRI complex (human)	0.0811066	0.115867	0	0	17.5153	43.9983	IGF2R
Cd3e-Nck1-Mink1 complex (mouse)	0.0811066	0.115867	0	0	17.5153	43.9983	CD3E
Lef1-Tle1-Ctnnb1 complex (mouse)	0.0811066	0.115867	0	0	17.5153	43.9983	LEF1
GTP-Rho-Rhpn1-Ropn1 complex (mouse)	0.0811066	0.115867	0	0	17.5153	43.9983	RHPN1
ITGB3-ITGAV-VTN complex (human)	0.0811066	0.115867	0	0	17.5153	43.9983	ITGAV
ITGAV-ITGB3-THBS1 complex (human)	0.0811066	0.115867	0	0	17.5153	43.9983	ITGAV
ITGAV-ITGB3-NOV complex (human)	0.0811066	0.115867	0	0	17.5153	43.9983	ITGAV
ITGAV-ITGB1-SPP1 complex (human)	0.0811066	0.115867	0	0	17.5153	43.9983	ITGAV
Fgr-Pyk2-p190RhoGap complex (mouse)	0.0811066	0.115867	0	0	17.5153	43.9983	FGR
PLC-gamma-1-Lab-Blnk complex, BCR stimulated (mouse)	0.0811066	0.115867	0	0	17.5153	43.9983	PLCG1
Meiotic cohesin complex (mouse)	0.106656	0.136571	0	0	11.6763	26.1333	REC8
E-box sequence-binding complex (human)	0.106656	0.136571	0	0	11.6763	26.1333	BEX2
Wave-2 complex (mouse)	0.106656	0.136571	0	0	11.6763	26.1333	NCKAP1
Skeletal muscle sarcoglycan complex SGC, beta-gamma-delta-zeta (mouse)	0.106656	0.136571	0	0	11.6763	26.1333	SGCB
Skeletal muscle sarcoglycan complex SGC, alpha-beta-epsilon-gamma (mouse)	0.106656	0.136571	0	0	11.6763	26.1333	SGCB
Skeletal muscle sarcoglycan complex SGC, alpha-beta-gamma-delta (mouse)	0.106656	0.136571	0	0	11.6763	26.1333	SGCB
Skeletal muscle sarcoglycan complex SGC, epsilon-beta-gamma-delta (mouse)	0.106656	0.136571	0	0	11.6763	26.1333	SGCB
ITGAV-ITGB8-MMP14-TGFB1 complex (human)	0.106656	0.136571	0	0	11.6763	26.1333	ITGAV
ITGAV-ITGB3-CD47-FCER2 complex (human)	0.106656	0.136571	0	0	11.6763	26.1333	ITGAV
TDT-TDIF2-core-histone complex (human)	0.106656	0.136571	0	0	11.6763	26.1333	DNTT
ITGAV-ITGB3-PXN-PTK2b complex (human)	0.106656	0.136571	0	0	11.6763	26.1333	ITGAV
TRP1-G alpha-11-IP3R3-CAV1 signaling complex (human)	0.106656	0.136571	0	0	11.6763	26.1333	ITPR3
Epo-R-PLC-gamma 1-IP(3)R type II-TRPC2 signaling complex (mouse)	0.106656	0.136571	0	0	11.6763	26.1333	PLCG1
GINS complex (human)	0.106656	0.136571	0	0	11.6763	26.1333	GINS2
PLC-gamma-1-SLP-76-SOS1-LAT complex (human)	0.106656	0.136571	0	0	11.6763	26.1333	PLCG1
FGFR2-c-Cbl-Lyn-Fyn complex (human)	0.106656	0.136571	0	0	11.6763	26.1333	FYN
p21(ras)GAP-Fyn-Lyn-Yes complex, thrombin stimulated (human)	0.106656	0.136571	0	0	11.6763	26.1333	FYN
LAT-PLC-gamma-1-p85-GRB2-SOS signaling complex, C305 activated (human)	0.131496	0.156012	0	0	8.75676	17.7656	PLCG1
Mi-2/NuRD-MTA2 complex (human)	0.131496	0.156012	0	0	8.75676	17.7656	MTA3
DNA repair complex NEIL1-PNK-Pol(beta)-LigIII(alpha)-XRCC1 (human)	0.131496	0.156012	0	0	8.75676	17.7656	NEIL1
SMAD3-E2F4/5-p107-DP1 complex (human)	0.131496	0.156012	0	0	8.75676	17.7656	E2F5
Wave-2 complex (human)	0.131496	0.156012	0	0	8.75676	17.7656	NCKAP1
Wave-2 complex (Rac-activated) (mouse)	0.131496	0.156012	0	0	8.75676	17.7656	NCKAP1
PPP2R1A-PPP2R1B-PPP2CA-PPME1-EIF4A1 complex (human)	0.131496	0.156012	0	0	8.75676	17.7656	PPP2R1B
Rb-tal-1-E2A-Lmo2-Ldb1 complex (human)	0.131496	0.156012	0	0	8.75676	17.7656	RB1
Sarcoglycan-sarcospan-complex SG-SPN (mouse)	0.131496	0.156012	0	0	8.75676	17.7656	SGCB
MSH2/6-BLM-p53-RAD51 complex (human)	0.131496	0.156012	0	0	8.75676	17.7656	RAD51
Mi2/NuRD-BCL6-MTA3 complex (human)	0.131496	0.156012	0	0	8.75676	17.7656	MTA3
AKAP250-PKA-PDE4D complex (human)	0.131496	0.156012	0	0	8.75676	17.7656	AKAP12
BRCC complex (human)	0.131496	0.156012	0	0	8.75676	17.7656	RAD51
RalBP1-CCNB1-AP2A-NUMB-EPN1 complex (human)	0.155646	0.17861	0	0	7.00505	13.0306	CCNB1
SMAD3/4-E2F4/5-p107-DP1 complex (human)	0.155646	0.17861	0	0	7.00505	13.0306	E2F5
Sarcoglycan-sarcospan-dystroglycan complex (mouse)	0.155646	0.17861	0	0	7.00505	13.0306	SGCB
MDC1-MRN-ATM-FANCD2 complex (human)	0.155646	0.17861	0	0	7.00505	13.0306	ATM
ASF1-interacting protein complex (human)	0.155646	0.17861	0	0	7.00505	13.0306	ASF1B
CENP-A nucleosome associated complex (human)	0.155646	0.17861	0	0	7.00505	13.0306	CENPM
DNMT3B complex (human)	0.179126	0.197981	0	0	5.83724	10.0381	SMC2
DNA double-strand break end-joining complex (human)	0.179126	0.197981	0	0	5.83724	10.0381	LIG4
Oligosaccharyltransferase complex (Stt3B variant) (human)	0.179126	0.197981	0	0	5.83724	10.0381	TUSC3
H2AX complex I (human)	0.179126	0.197981	0	0	5.83724	10.0381	DHX30
ASF1-histone containing complex (human)	0.179126	0.197981	0	0	5.83724	10.0381	ASF1B
LAT-PLC-gamma-1-p85-GRB2-CBL-VAV-SLP-76 signaling complex, C305 activated (human)	0.179126	0.197981	0	0	5.83724	10.0381	PLCG1
Toposome (human)	0.179126	0.197981	0	0	5.83724	10.0381	TOP2A
Emerin complex 1 (human)	0.201954	0.21861	0	0	5.00309	8.00351	LMO7
BCOR complex (human)	0.201954	0.21861	0	0	5.00309	8.00351	BCOR
NuRD.1 complex (human)	0.201954	0.21861	0	0	5.00309	8.00351	MTA3
RICH1/AMOT polarity complex, Flag-Amot precipitated (human)	0.201954	0.21861	0	0	5.00309	8.00351	MPP7
Emerin regulatory complex (human)	0.224149	0.236539	0	0	4.37748	6.54628	LMO7
Histone H3.3 complex (human)	0.224149	0.236539	0	0	4.37748	6.54628	ASF1B
Sarcoglycan-sarcospan-syntrophin-dystrobrevin complex (mouse)	0.224149	0.236539	0	0	4.37748	6.54628	SGCB
Profilin 2 complex (mouse)	0.224149	0.236539	0	0	4.37748	6.54628	NCKAP1
RC complex (Replication competent complex) (human)	0.224149	0.236539	0	0	4.37748	6.54628	CCNA2
Histone H3.1 complex (human)	0.245727	0.255459	0	0	3.89089	5.461	ASF1B
Dystrophin-sarcoglycan-syntrophin complex, skeletal muscle (mouse)	0.245727	0.255459	0	0	3.89089	5.461	SGCB
Kaiso-NCOR complex (human)	0.245727	0.255459	0	0	3.89089	5.461	KIF11
BASC complex (BRCA1-associated genome surveillance complex) (human)	0.287103	0.297003	0	0	3.18313	3.97227	ATM
Gata1-Fog1-MeCP1 complex (mouse)	0.306934	0.312893	0	0	2.91772	3.44619	MTA3
DNA synthesome complex (mouse)	0.306934	0.312893	0	0	2.91772	3.44619	TOP2A
RC complex during S-phase of cell cycle (human)	0.306934	0.312893	0	0	2.91772	3.44619	CCNA2
Emerin complex 24 (human)	0.344958	0.349957	0	0	2.50064	2.66152	RB1
DNA synthesome complex (17 subunits) (human)	0.398125	0.401953	0	0	2.05904	1.89635	TOP2A
Parvulin-associated pre-rRNP complex (mouse)	0.517522	0.519998	0	0	1.16631	0.768249	TPX2;MND1
CDC5L complex (human)	0.571058	0.571058	0	0	1.20628	0.675834	TOP2A
