# Supplementary material for: In Silico Integration of Transcriptome and Interactome Predicts an ETP-ALL-Specific Transcriptional Footprint that Decodes its Developmental Propensity
Source: Front Cell Dev Biol. 2022 May 13;10:899752. doi: 10.3389/fcell.2022.899752 (PMC9138408; doi:10.3389/fcell.2022.899752)
Supplement: Supplementary file 7 [file Table1.XLSX]

## Sheet: GSE28703
Group	Accession	Title	Source name	Cell type
ETP-ALL	GSM710838	SJTALL001	RNA extracted from diagnostic leukemic blasts of early T-cell precursor acute lymphoblastic leukemia	tumor cells
ETP-ALL	GSM710840	SJTALL002	RNA extracted from diagnostic leukemic blasts of early T-cell precursor acute lymphoblastic leukemia	tumor cells
ETP-ALL	GSM710842	SJTALL005	RNA extracted from diagnostic leukemic blasts of early T-cell precursor acute lymphoblastic leukemia	tumor cells
ETP-ALL	GSM710844	SJTALL006	RNA extracted from diagnostic leukemic blasts of early T-cell precursor acute lymphoblastic leukemia	tumor cells
ETP-ALL	GSM710847	SJTALL009	RNA extracted from diagnostic leukemic blasts of early T-cell precursor acute lymphoblastic leukemia	tumor cells
ETP-ALL	GSM710848	SJTALL010	RNA extracted from diagnostic leukemic blasts of early T-cell precursor acute lymphoblastic leukemia	tumor cells
ETP-ALL	GSM710850	SJTALL011	RNA extracted from diagnostic leukemic blasts of early T-cell precursor acute lymphoblastic leukemia	tumor cells
non-ETP-ALL	GSM710851	SJTALL015	RNA extracted from diagnostic leukemic blasts of T-cell precursor acute lymphoblastic leukemia (non-ETP)	tumor cells
non-ETP-ALL	GSM710852	SJTALL016	RNA extracted from diagnostic leukemic blasts of T-cell precursor acute lymphoblastic leukemia (non-ETP)	tumor cells
non-ETP-ALL	GSM710854	SJTALL019	RNA extracted from diagnostic leukemic blasts of T-cell precursor acute lymphoblastic leukemia (non-ETP)	tumor cells
non-ETP-ALL	GSM710856	SJTALL020	RNA extracted from diagnostic leukemic blasts of T-cell precursor acute lymphoblastic leukemia (non-ETP)	tumor cells
non-ETP-ALL	GSM710857	SJTALL021	RNA extracted from diagnostic leukemic blasts of T-cell precursor acute lymphoblastic leukemia (non-ETP)	tumor cells
non-ETP-ALL	GSM710859	SJTALL022	RNA extracted from diagnostic leukemic blasts of T-cell precursor acute lymphoblastic leukemia (non-ETP)	tumor cells
non-ETP-ALL	GSM710861	SJTALL024	RNA extracted from diagnostic leukemic blasts of T-cell precursor acute lymphoblastic leukemia (non-ETP)	tumor cells
non-ETP-ALL	GSM710864	SJTALL025	RNA extracted from diagnostic leukemic blasts of T-cell precursor acute lymphoblastic leukemia (non-ETP)	tumor cells
non-ETP-ALL	GSM710866	SJTALL026	RNA extracted from diagnostic leukemic blasts of T-cell precursor acute lymphoblastic leukemia (non-ETP)	tumor cells
non-ETP-ALL	GSM710868	SJTALL027	RNA extracted from diagnostic leukemic blasts of T-cell precursor acute lymphoblastic leukemia (non-ETP)	tumor cells
non-ETP-ALL	GSM710870	SJTALL028	RNA extracted from diagnostic leukemic blasts of T-cell precursor acute lymphoblastic leukemia (non-ETP)	tumor cells
non-ETP-ALL	GSM710872	SJTALL029	RNA extracted from diagnostic leukemic blasts of T-cell precursor acute lymphoblastic leukemia (non-ETP)	tumor cells
non-ETP-ALL	GSM710874	SJTALL030	RNA extracted from diagnostic leukemic blasts of T-cell precursor acute lymphoblastic leukemia (non-ETP)	tumor cells
non-ETP-ALL	GSM710876	SJTALL031	RNA extracted from diagnostic leukemic blasts of T-cell precursor acute lymphoblastic leukemia (non-ETP)	tumor cells
non-ETP-ALL	GSM710878	SJTALL032	RNA extracted from diagnostic leukemic blasts of T-cell precursor acute lymphoblastic leukemia (non-ETP)	tumor cells
non-ETP-ALL	GSM710880	SJTALL033	RNA extracted from diagnostic leukemic blasts of T-cell precursor acute lymphoblastic leukemia (non-ETP)	tumor cells
non-ETP-ALL	GSM710882	SJTALL034	RNA extracted from diagnostic leukemic blasts of T-cell precursor acute lymphoblastic leukemia (non-ETP)	tumor cells
non-ETP-ALL	GSM710884	SJTALL036	RNA extracted from diagnostic leukemic blasts of T-cell precursor acute lymphoblastic leukemia (non-ETP)	tumor cells
non-ETP-ALL	GSM710887	SJTALL037	RNA extracted from diagnostic leukemic blasts of T-cell precursor acute lymphoblastic leukemia (non-ETP)	tumor cells
non-ETP-ALL	GSM710889	SJTALL038	RNA extracted from diagnostic leukemic blasts of T-cell precursor acute lymphoblastic leukemia (non-ETP)	tumor cells
non-ETP-ALL	GSM710891	SJTALL041	RNA extracted from diagnostic leukemic blasts of T-cell precursor acute lymphoblastic leukemia (non-ETP)	tumor cells
non-ETP-ALL	GSM710893	SJTALL044	RNA extracted from diagnostic leukemic blasts of T-cell precursor acute lymphoblastic leukemia (non-ETP)	tumor cells
non-ETP-ALL	GSM710895	SJTALL047	RNA extracted from diagnostic leukemic blasts of T-cell precursor acute lymphoblastic leukemia (non-ETP)	tumor cells
non-ETP-ALL	GSM710897	SJTALL048	RNA extracted from diagnostic leukemic blasts of T-cell precursor acute lymphoblastic leukemia (non-ETP)	tumor cells
non-ETP-ALL	GSM710899	SJTALL050	RNA extracted from diagnostic leukemic blasts of T-cell precursor acute lymphoblastic leukemia (non-ETP)	tumor cells
non-ETP-ALL	GSM710901	SJTALL056	RNA extracted from diagnostic leukemic blasts of T-cell precursor acute lymphoblastic leukemia (non-ETP)	tumor cells
non-ETP-ALL	GSM710903	SJTALL066	RNA extracted from diagnostic leukemic blasts of T-cell precursor acute lymphoblastic leukemia (non-ETP)	tumor cells
non-ETP-ALL	GSM710904	SJTALL067	RNA extracted from diagnostic leukemic blasts of T-cell precursor acute lymphoblastic leukemia (non-ETP)	tumor cells
non-ETP-ALL	GSM710907	SJTALL068	RNA extracted from diagnostic leukemic blasts of T-cell precursor acute lymphoblastic leukemia (non-ETP)	tumor cells
non-ETP-ALL	GSM710909	SJTALL069	RNA extracted from diagnostic leukemic blasts of T-cell precursor acute lymphoblastic leukemia (non-ETP)	tumor cells
non-ETP-ALL	GSM710910	SJTALL070	RNA extracted from diagnostic leukemic blasts of T-cell precursor acute lymphoblastic leukemia (non-ETP)	tumor cells
non-ETP-ALL	GSM710912	SJTALL071	RNA extracted from diagnostic leukemic blasts of T-cell precursor acute lymphoblastic leukemia (non-ETP)	tumor cells
non-ETP-ALL	GSM710914	SJTALL072	RNA extracted from diagnostic leukemic blasts of T-cell precursor acute lymphoblastic leukemia (non-ETP)	tumor cells
non-ETP-ALL	GSM710917	SJTALL075	RNA extracted from diagnostic leukemic blasts of T-cell precursor acute lymphoblastic leukemia (non-ETP)	tumor cells
non-ETP-ALL	GSM710919	SJTALL077	RNA extracted from diagnostic leukemic blasts of T-cell precursor acute lymphoblastic leukemia (non-ETP)	tumor cells
non-ETP-ALL	GSM710921	SJTALL078	RNA extracted from diagnostic leukemic blasts of T-cell precursor acute lymphoblastic leukemia (non-ETP)	tumor cells
non-ETP-ALL	GSM710923	SJTALL079	RNA extracted from diagnostic leukemic blasts of T-cell precursor acute lymphoblastic leukemia (non-ETP)	tumor cells
non-ETP-ALL	GSM710925	SJTALL143	RNA extracted from diagnostic leukemic blasts of T-cell precursor acute lymphoblastic leukemia (non-ETP)	tumor cells
non-ETP-ALL	GSM710927	SJTALL157	RNA extracted from diagnostic leukemic blasts of T-cell precursor acute lymphoblastic leukemia (non-ETP)	tumor cells
non-ETP-ALL	GSM710929	SJTALL159	RNA extracted from diagnostic leukemic blasts of T-cell precursor acute lymphoblastic leukemia (non-ETP)	tumor cells
ETP-ALL	GSM710931	SJTALL161	RNA extracted from diagnostic leukemic blasts of early T-cell precursor acute lymphoblastic leukemia	tumor cells
ETP-ALL	GSM710932	SJTALL162	RNA extracted from diagnostic leukemic blasts of early T-cell precursor acute lymphoblastic leukemia	tumor cells
ETP-ALL	GSM710933	SJTALL163	RNA extracted from diagnostic leukemic blasts of early T-cell precursor acute lymphoblastic leukemia	tumor cells
ETP-ALL	GSM710934	SJTALL164	RNA extracted from diagnostic leukemic blasts of early T-cell precursor acute lymphoblastic leukemia	tumor cells
ETP-ALL	GSM710935	SJTALL165	RNA extracted from diagnostic leukemic blasts of early T-cell precursor acute lymphoblastic leukemia	tumor cells

## Sheet: GSE78132
Group	Accession	Title	Source name	Patient age at diagnosis	All type
non-ETP-ALL	GSM2067756	T_ALL_patient_1 [GPL96]	bone marrow mononuclear cells	22	thymic T-ALL
ETP-ALL	GSM2067757	T_ALL_patient_2 [GPL96]	bone marrow mononuclear cells	18	pre-T-ALL
non-ETP-ALL	GSM2067758	T_ALL_patient_3 [GPL96]	bone marrow mononuclear cells	34	thymic T-ALL
non-ETP-ALL	GSM2067759	T_ALL_patient_4 [GPL96]	bone marrow mononuclear cells	52	mature T-ALL
non-ETP-ALL	GSM2067760	T_ALL_patient_5 [GPL96]	bone marrow mononuclear cells	24	thymic T-ALL
ETP-ALL	GSM2067761	T_ALL_patient_6 [GPL96]	bone marrow mononuclear cells	39	pre-T-ALL
ETP-ALL	GSM2067762	T_ALL_patient_7 [GPL96]	bone marrow mononuclear cells	59	pre-T-ALL
ETP-ALL	GSM2067763	T_ALL_patient_8 [GPL96]	bone marrow mononuclear cells	22	pre-T-ALL
non-ETP-ALL	GSM2067764	T_ALL_patient_9 [GPL96]	bone marrow mononuclear cells	59	thymic T-ALL
non-ETP-ALL	GSM2067765	T_ALL_patient_10 [GPL96]	bone marrow mononuclear cells	39	thymic T-ALL
non-ETP-ALL	GSM2067766	T_ALL_patient_11 [GPL96]	bone marrow mononuclear cells	20	mature T-ALL
ETP-ALL	GSM2067767	T_ALL_patient_12 [GPL96]	bone marrow mononuclear cells	46	pre-T-ALL
non-ETP-ALL	GSM2067768	T_ALL_patient_13 [GPL96]	bone marrow mononuclear cells	39	thymic T-ALL
non-ETP-ALL	GSM2067769	T_ALL_patient_14 [GPL96]	bone marrow mononuclear cells	29	thymic T-ALL
non-ETP-ALL	GSM2067770	T_ALL_patient_15 [GPL96]	bone marrow mononuclear cells	69	mature T-ALL
non-ETP-ALL	GSM2067771	T_ALL_patient_16 [GPL96]	bone marrow mononuclear cells	36	mature T-ALL
non-ETP-ALL	GSM2067772	T_ALL_patient_17 [GPL96]	bone marrow mononuclear cells	26	mature T-ALL
non-ETP-ALL	GSM2067773	T_ALL_patient_18 [GPL96]	bone marrow mononuclear cells	61	thymic T-ALL
ETP-ALL	GSM2067774	T_ALL_patient_19 [GPL96]	bone marrow mononuclear cells	65	pre-T-ALL
non-ETP-ALL	GSM2067775	T_ALL_patient_20 [GPL96]	bone marrow mononuclear cells	36	thymic T-ALL
non-ETP-ALL	GSM2067776	T_ALL_patient_21 [GPL96]	bone marrow mononuclear cells	16	thymic T-ALL
non-ETP-ALL	GSM2067777	T_ALL_patient_22 [GPL96]	bone marrow mononuclear cells	56	mature T-ALL
non-ETP-ALL	GSM2067778	T_ALL_patient_23 [GPL96]	bone marrow mononuclear cells	18	thymic T-ALL
ETP-ALL	GSM2067779	T_ALL_patient_24 [GPL96]	bone marrow mononuclear cells	77	pre-T-ALL
ETP-ALL	GSM2067780	T_ALL_patient_25 [GPL96]	bone marrow mononuclear cells	73	pre-T-ALL
non-ETP-ALL	GSM2067781	T_ALL_patient_26 [GPL96]	bone marrow mononuclear cells	45	mature T-ALL
non-ETP-ALL	GSM2067782	T_ALL_patient_27 [GPL96]	bone marrow mononuclear cells	38	thymic T-ALL
ETP-ALL	GSM2067783	T_ALL_patient_28 [GPL96]	bone marrow mononuclear cells	43	pre-T-ALL
ETP-ALL	GSM2067784	T_ALL_patient_29 [GPL96]	bone marrow mononuclear cells	60	pre-T-ALL
non-ETP-ALL	GSM2067785	T_ALL_patient_30 [GPL96]	bone marrow mononuclear cells	20	thymic T-ALL
ETP-ALL	GSM2067786	T_ALL_patient_31 [GPL96]	bone marrow mononuclear cells	34	pre-T-ALL
ETP-ALL	GSM2067787	T_ALL_patient_32 [GPL96]	bone marrow mononuclear cells	27	pre-T-ALL
non-ETP-ALL	GSM2067788	T_ALL_patient_33 [GPL96]	bone marrow mononuclear cells	21	thymic T-ALL
non-ETP-ALL	GSM2067789	T_ALL_patient_34 [GPL96]	bone marrow mononuclear cells	37	thymic T-ALL
non-ETP-ALL	GSM2067790	T_ALL_patient_35 [GPL96]	bone marrow mononuclear cells	46	thymic T-ALL
non-ETP-ALL	GSM2067791	T_ALL_patient_36 [GPL96]	bone marrow mononuclear cells	42	thymic T-ALL
ETP-ALL	GSM2067792	T_ALL_patient_37 [GPL96]	bone marrow mononuclear cells	32	pre-T-ALL
ETP-ALL	GSM2067793	T_ALL_patient_38 [GPL96]	bone marrow mononuclear cells	21	pre-T-ALL
non-ETP-ALL	GSM2067794	T_ALL_patient_39 [GPL96]	bone marrow mononuclear cells	18	mature T-ALL
ETP-ALL	GSM2067795	T_ALL_patient_40 [GPL96]	bone marrow mononuclear cells	74	pre-T-ALL
ETP-ALL	GSM2067796	T_ALL_patient_41 [GPL96]	bone marrow mononuclear cells	27	pre-T-ALL
ETP-ALL	GSM2067797	T_ALL_patient_42 [GPL96]	bone marrow mononuclear cells	45	pre-T-ALL
non-ETP-ALL	GSM2067798	T_ALL_patient_43 [GPL96]	bone marrow mononuclear cells	22	thymic T-ALL
non-ETP-ALL	GSM2067799	T_ALL_patient_44 [GPL96]	bone marrow mononuclear cells	46	thymic T-ALL

## Sheet: GSE13159
Group	Accession	Title	Source name	Sample type	Leukemia class
-	GSM329407	MILES stage 1 data N1_0001	Leukemia patient sample	bone marrow	mature B-ALL with t(8;14)
-	GSM329408	MILES stage 1 data N1_0002	Leukemia patient sample	bone marrow	mature B-ALL with t(8;14)
-	GSM329409	MILES stage 1 data N1_0003	Leukemia patient sample	bone marrow	mature B-ALL with t(8;14)
-	GSM329410	MILES stage 1 data N1_0004	Leukemia patient sample	bone marrow	mature B-ALL with t(8;14)
-	GSM329411	MILES stage 1 data N1_0005	Leukemia patient sample	bone marrow	mature B-ALL with t(8;14)
-	GSM329412	MILES stage 1 data N1_0006	Leukemia patient sample	bone marrow	mature B-ALL with t(8;14)
-	GSM329413	MILES stage 1 data N1_0007	Leukemia patient sample	bone marrow	mature B-ALL with t(8;14)
-	GSM329414	MILES stage 1 data N1_0008	Leukemia patient sample	bone marrow	mature B-ALL with t(8;14)
-	GSM329415	MILES stage 1 data N1_0009	Leukemia patient sample	bone marrow	mature B-ALL with t(8;14)
-	GSM329416	MILES stage 1 data N1_0010	Leukemia patient sample	bone marrow	mature B-ALL with t(8;14)
-	GSM329417	MILES stage 1 data N1_0011	Leukemia patient sample	peripheral blood	mature B-ALL with t(8;14)
-	GSM329418	MILES stage 1 data N1_0012	Leukemia patient sample	bone marrow	mature B-ALL with t(8;14)
-	GSM329419	MILES stage 1 data N1_0013	Leukemia patient sample	bone marrow	mature B-ALL with t(8;14)
-	GSM329420	MILES stage 1 data N1_0014	Leukemia patient sample	bone marrow	Pro-B-ALL with t(11q23)/MLL
-	GSM329421	MILES stage 1 data N1_0015	Leukemia patient sample	peripheral blood	Pro-B-ALL with t(11q23)/MLL
-	GSM329422	MILES stage 1 data N1_0016	Leukemia patient sample	bone marrow	Pro-B-ALL with t(11q23)/MLL
-	GSM329423	MILES stage 1 data N1_0017	Leukemia patient sample	peripheral blood	Pro-B-ALL with t(11q23)/MLL
-	GSM329424	MILES stage 1 data N1_0018	Leukemia patient sample	bone marrow	Pro-B-ALL with t(11q23)/MLL
-	GSM329425	MILES stage 1 data N1_0019	Leukemia patient sample	bone marrow	Pro-B-ALL with t(11q23)/MLL
-	GSM329426	MILES stage 1 data N1_0020	Leukemia patient sample	bone marrow	Pro-B-ALL with t(11q23)/MLL
-	GSM329427	MILES stage 1 data N1_0021	Leukemia patient sample	bone marrow	Pro-B-ALL with t(11q23)/MLL
-	GSM329428	MILES stage 1 data N1_0022	Leukemia patient sample	peripheral blood	Pro-B-ALL with t(11q23)/MLL
-	GSM329429	MILES stage 1 data N1_0023	Leukemia patient sample	bone marrow	Pro-B-ALL with t(11q23)/MLL
-	GSM329430	MILES stage 1 data N1_0024	Leukemia patient sample	bone marrow	Pro-B-ALL with t(11q23)/MLL
-	GSM329431	MILES stage 1 data N1_0025	Leukemia patient sample	bone marrow	Pro-B-ALL with t(11q23)/MLL
-	GSM329432	MILES stage 1 data N1_0026	Leukemia patient sample	bone marrow	Pro-B-ALL with t(11q23)/MLL
-	GSM329433	MILES stage 1 data N1_0027	Leukemia patient sample	peripheral blood	Pro-B-ALL with t(11q23)/MLL
-	GSM329434	MILES stage 1 data N1_0028	Leukemia patient sample	bone marrow	Pro-B-ALL with t(11q23)/MLL
-	GSM329435	MILES stage 1 data N1_0029	Leukemia patient sample	peripheral blood	Pro-B-ALL with t(11q23)/MLL
-	GSM329436	MILES stage 1 data N1_0030	Leukemia patient sample	bone marrow	Pro-B-ALL with t(11q23)/MLL
-	GSM329437	MILES stage 1 data N1_0031	Leukemia patient sample	bone marrow	Pro-B-ALL with t(11q23)/MLL
-	GSM329438	MILES stage 1 data N1_0032	Leukemia patient sample	bone marrow	Pro-B-ALL with t(11q23)/MLL
-	GSM329439	MILES stage 1 data N1_0033	Leukemia patient sample	bone marrow	Pro-B-ALL with t(11q23)/MLL
-	GSM329440	MILES stage 1 data N1_0034	Leukemia patient sample	bone marrow	Pro-B-ALL with t(11q23)/MLL
-	GSM329441	MILES stage 1 data N1_0035	Leukemia patient sample	bone marrow	Pro-B-ALL with t(11q23)/MLL
-	GSM329442	MILES stage 1 data N1_0036	Leukemia patient sample	bone marrow	Pro-B-ALL with t(11q23)/MLL
-	GSM329443	MILES stage 1 data N1_0037	Leukemia patient sample	bone marrow	Pro-B-ALL with t(11q23)/MLL
-	GSM329444	MILES stage 1 data N1_0038	Leukemia patient sample	bone marrow	Pro-B-ALL with t(11q23)/MLL
-	GSM329445	MILES stage 1 data N1_0039	Leukemia patient sample	bone marrow	Pro-B-ALL with t(11q23)/MLL
-	GSM329446	MILES stage 1 data N1_0040	Leukemia patient sample	bone marrow	Pro-B-ALL with t(11q23)/MLL
-	GSM329447	MILES stage 1 data N1_0041	Leukemia patient sample	bone marrow	Pro-B-ALL with t(11q23)/MLL
-	GSM329448	MILES stage 1 data N1_0042	Leukemia patient sample	bone marrow	Pro-B-ALL with t(11q23)/MLL
-	GSM329449	MILES stage 1 data N1_0043	Leukemia patient sample	peripheral blood	Pro-B-ALL with t(11q23)/MLL
-	GSM329450	MILES stage 1 data N1_0044	Leukemia patient sample	peripheral blood	Pro-B-ALL with t(11q23)/MLL
-	GSM329451	MILES stage 1 data N1_0045	Leukemia patient sample	bone marrow	Pro-B-ALL with t(11q23)/MLL
-	GSM329452	MILES stage 1 data N1_0046	Leukemia patient sample	bone marrow	Pro-B-ALL with t(11q23)/MLL
-	GSM329453	MILES stage 1 data N1_0047	Leukemia patient sample	bone marrow	Pro-B-ALL with t(11q23)/MLL
-	GSM329454	MILES stage 1 data N1_0048	Leukemia patient sample	bone marrow	Pro-B-ALL with t(11q23)/MLL
-	GSM329455	MILES stage 1 data N1_0049	Leukemia patient sample	bone marrow	Pro-B-ALL with t(11q23)/MLL
-	GSM329456	MILES stage 1 data N1_0050	Leukemia patient sample	peripheral blood	Pro-B-ALL with t(11q23)/MLL
-	GSM329457	MILES stage 1 data N1_0051	Leukemia patient sample	bone marrow	Pro-B-ALL with t(11q23)/MLL
-	GSM329458	MILES stage 1 data N1_0052	Leukemia patient sample	peripheral blood	Pro-B-ALL with t(11q23)/MLL
-	GSM329459	MILES stage 1 data N1_0053	Leukemia patient sample	bone marrow	Pro-B-ALL with t(11q23)/MLL
-	GSM329460	MILES stage 1 data N1_0054	Leukemia patient sample	bone marrow	Pro-B-ALL with t(11q23)/MLL
-	GSM329461	MILES stage 1 data N1_0055	Leukemia patient sample	peripheral blood	Pro-B-ALL with t(11q23)/MLL
-	GSM329462	MILES stage 1 data N1_0056	Leukemia patient sample	bone marrow	Pro-B-ALL with t(11q23)/MLL
-	GSM329463	MILES stage 1 data N1_0057	Leukemia patient sample	bone marrow	Pro-B-ALL with t(11q23)/MLL
-	GSM329464	MILES stage 1 data N1_0058	Leukemia patient sample	bone marrow	Pro-B-ALL with t(11q23)/MLL
-	GSM329465	MILES stage 1 data N1_0059	Leukemia patient sample	bone marrow	Pro-B-ALL with t(11q23)/MLL
-	GSM329466	MILES stage 1 data N1_0060	Leukemia patient sample	bone marrow	Pro-B-ALL with t(11q23)/MLL
-	GSM329467	MILES stage 1 data N1_0061	Leukemia patient sample	bone marrow	Pro-B-ALL with t(11q23)/MLL
-	GSM329468	MILES stage 1 data N1_0062	Leukemia patient sample	bone marrow	Pro-B-ALL with t(11q23)/MLL
-	GSM329469	MILES stage 1 data N1_0063	Leukemia patient sample	bone marrow	Pro-B-ALL with t(11q23)/MLL
-	GSM329470	MILES stage 1 data N1_0064	Leukemia patient sample	peripheral blood	Pro-B-ALL with t(11q23)/MLL
-	GSM329471	MILES stage 1 data N1_0065	Leukemia patient sample	bone marrow	Pro-B-ALL with t(11q23)/MLL
-	GSM329472	MILES stage 1 data N1_0066	Leukemia patient sample	bone marrow	Pro-B-ALL with t(11q23)/MLL
-	GSM329473	MILES stage 1 data N1_0067	Leukemia patient sample	bone marrow	Pro-B-ALL with t(11q23)/MLL
-	GSM329474	MILES stage 1 data N1_0068	Leukemia patient sample	bone marrow	Pro-B-ALL with t(11q23)/MLL
-	GSM329475	MILES stage 1 data N1_0069	Leukemia patient sample	bone marrow	Pro-B-ALL with t(11q23)/MLL
-	GSM329476	MILES stage 1 data N1_0070	Leukemia patient sample	bone marrow	Pro-B-ALL with t(11q23)/MLL
-	GSM329477	MILES stage 1 data N1_0071	Leukemia patient sample	bone marrow	Pro-B-ALL with t(11q23)/MLL
-	GSM329478	MILES stage 1 data N1_0072	Leukemia patient sample	bone marrow	Pro-B-ALL with t(11q23)/MLL
-	GSM329479	MILES stage 1 data N1_0073	Leukemia patient sample	bone marrow	Pro-B-ALL with t(11q23)/MLL
-	GSM329480	MILES stage 1 data N1_0074	Leukemia patient sample	bone marrow	Pro-B-ALL with t(11q23)/MLL
-	GSM329481	MILES stage 1 data N1_0075	Leukemia patient sample	bone marrow	Pro-B-ALL with t(11q23)/MLL
-	GSM329482	MILES stage 1 data N1_0076	Leukemia patient sample	bone marrow	Pro-B-ALL with t(11q23)/MLL
-	GSM329483	MILES stage 1 data N1_0077	Leukemia patient sample	bone marrow	Pro-B-ALL with t(11q23)/MLL
-	GSM329484	MILES stage 1 data N1_0078	Leukemia patient sample	bone marrow	Pro-B-ALL with t(11q23)/MLL
-	GSM329485	MILES stage 1 data N1_0079	Leukemia patient sample	peripheral blood	Pro-B-ALL with t(11q23)/MLL
-	GSM329486	MILES stage 1 data N1_0080	Leukemia patient sample	bone marrow	Pro-B-ALL with t(11q23)/MLL
-	GSM329487	MILES stage 1 data N1_0081	Leukemia patient sample	peripheral blood	Pro-B-ALL with t(11q23)/MLL
-	GSM329488	MILES stage 1 data N1_0082	Leukemia patient sample	peripheral blood	Pro-B-ALL with t(11q23)/MLL
-	GSM329489	MILES stage 1 data N1_0083	Leukemia patient sample	peripheral blood	Pro-B-ALL with t(11q23)/MLL
-	GSM329490	MILES stage 1 data N1_0084	Leukemia patient sample	bone marrow	c-ALL/Pre-B-ALL with t(9;22)
-	GSM329491	MILES stage 1 data N1_0085	Leukemia patient sample	bone marrow	c-ALL/Pre-B-ALL with t(9;22)
-	GSM329716	MILES stage 1 data N1_0086	Leukemia patient sample	peripheral blood	c-ALL/Pre-B-ALL with t(9;22)
-	GSM329717	MILES stage 1 data N1_0087	Leukemia patient sample	bone marrow	c-ALL/Pre-B-ALL with t(9;22)
-	GSM329718	MILES stage 1 data N1_0088	Leukemia patient sample	bone marrow	c-ALL/Pre-B-ALL with t(9;22)
-	GSM329719	MILES stage 1 data N1_0089	Leukemia patient sample	bone marrow	c-ALL/Pre-B-ALL with t(9;22)
-	GSM329720	MILES stage 1 data N1_0090	Leukemia patient sample	bone marrow	c-ALL/Pre-B-ALL with t(9;22)
-	GSM329721	MILES stage 1 data N1_0091	Leukemia patient sample	bone marrow	c-ALL/Pre-B-ALL with t(9;22)
-	GSM329722	MILES stage 1 data N1_0092	Leukemia patient sample	bone marrow	c-ALL/Pre-B-ALL with t(9;22)
-	GSM329723	MILES stage 1 data N1_0093	Leukemia patient sample	bone marrow	c-ALL/Pre-B-ALL with t(9;22)
-	GSM329724	MILES stage 1 data N1_0094	Leukemia patient sample	bone marrow	c-ALL/Pre-B-ALL with t(9;22)
-	GSM329725	MILES stage 1 data N1_0095	Leukemia patient sample	bone marrow	c-ALL/Pre-B-ALL with t(9;22)
-	GSM329726	MILES stage 1 data N1_0096	Leukemia patient sample	bone marrow	c-ALL/Pre-B-ALL with t(9;22)
-	GSM329727	MILES stage 1 data N1_0097	Leukemia patient sample	bone marrow	c-ALL/Pre-B-ALL with t(9;22)
-	GSM329728	MILES stage 1 data N1_0098	Leukemia patient sample	bone marrow	c-ALL/Pre-B-ALL with t(9;22)
-	GSM329729	MILES stage 1 data N1_0099	Leukemia patient sample	bone marrow	c-ALL/Pre-B-ALL with t(9;22)
-	GSM329730	MILES stage 1 data N1_0100	Leukemia patient sample	bone marrow	c-ALL/Pre-B-ALL with t(9;22)
-	GSM329731	MILES stage 1 data N1_0101	Leukemia patient sample	bone marrow	c-ALL/Pre-B-ALL with t(9;22)
-	GSM329732	MILES stage 1 data N1_0102	Leukemia patient sample	bone marrow	c-ALL/Pre-B-ALL with t(9;22)
-	GSM329733	MILES stage 1 data N1_0103	Leukemia patient sample	bone marrow	c-ALL/Pre-B-ALL with t(9;22)
-	GSM329734	MILES stage 1 data N1_0104	Leukemia patient sample	peripheral blood	c-ALL/Pre-B-ALL with t(9;22)
-	GSM329735	MILES stage 1 data N1_0105	Leukemia patient sample	bone marrow	c-ALL/Pre-B-ALL with t(9;22)
-	GSM329736	MILES stage 1 data N1_0106	Leukemia patient sample	bone marrow	c-ALL/Pre-B-ALL with t(9;22)
-	GSM329737	MILES stage 1 data N1_0107	Leukemia patient sample	bone marrow	c-ALL/Pre-B-ALL with t(9;22)
-	GSM329738	MILES stage 1 data N1_0108	Leukemia patient sample	bone marrow	c-ALL/Pre-B-ALL with t(9;22)
-	GSM329739	MILES stage 1 data N1_0109	Leukemia patient sample	peripheral blood	c-ALL/Pre-B-ALL with t(9;22)
-	GSM329740	MILES stage 1 data N1_0110	Leukemia patient sample	bone marrow	c-ALL/Pre-B-ALL with t(9;22)
-	GSM329741	MILES stage 1 data N1_0111	Leukemia patient sample	bone marrow	c-ALL/Pre-B-ALL with t(9;22)
-	GSM329742	MILES stage 1 data N1_0112	Leukemia patient sample	bone marrow	c-ALL/Pre-B-ALL with t(9;22)
-	GSM329743	MILES stage 1 data N1_0113	Leukemia patient sample	bone marrow	c-ALL/Pre-B-ALL with t(9;22)
-	GSM329744	MILES stage 1 data N1_0114	Leukemia patient sample	bone marrow	c-ALL/Pre-B-ALL with t(9;22)
-	GSM329745	MILES stage 1 data N1_0115	Leukemia patient sample	bone marrow	c-ALL/Pre-B-ALL with t(9;22)
-	GSM329746	MILES stage 1 data N1_0116	Leukemia patient sample	bone marrow	c-ALL/Pre-B-ALL with t(9;22)
-	GSM329747	MILES stage 1 data N1_0117	Leukemia patient sample	bone marrow	c-ALL/Pre-B-ALL with t(9;22)
-	GSM329748	MILES stage 1 data N1_0118	Leukemia patient sample	bone marrow	c-ALL/Pre-B-ALL with t(9;22)
-	GSM329749	MILES stage 1 data N1_0119	Leukemia patient sample	bone marrow	c-ALL/Pre-B-ALL with t(9;22)
-	GSM329750	MILES stage 1 data N1_0120	Leukemia patient sample	bone marrow	c-ALL/Pre-B-ALL with t(9;22)
-	GSM329751	MILES stage 1 data N1_0121	Leukemia patient sample	bone marrow	c-ALL/Pre-B-ALL with t(9;22)
-	GSM329752	MILES stage 1 data N1_0122	Leukemia patient sample	bone marrow	c-ALL/Pre-B-ALL with t(9;22)
-	GSM329753	MILES stage 1 data N1_0123	Leukemia patient sample	peripheral blood	c-ALL/Pre-B-ALL with t(9;22)
-	GSM329754	MILES stage 1 data N1_0124	Leukemia patient sample	bone marrow	c-ALL/Pre-B-ALL with t(9;22)
-	GSM329755	MILES stage 1 data N1_0125	Leukemia patient sample	bone marrow	c-ALL/Pre-B-ALL with t(9;22)
-	GSM329756	MILES stage 1 data N1_0126	Leukemia patient sample	bone marrow	c-ALL/Pre-B-ALL with t(9;22)
-	GSM329757	MILES stage 1 data N1_0127	Leukemia patient sample	bone marrow	c-ALL/Pre-B-ALL with t(9;22)
-	GSM329758	MILES stage 1 data N1_0128	Leukemia patient sample	bone marrow	c-ALL/Pre-B-ALL with t(9;22)
-	GSM329759	MILES stage 1 data N1_0129	Leukemia patient sample	bone marrow	c-ALL/Pre-B-ALL with t(9;22)
-	GSM329760	MILES stage 1 data N1_0130	Leukemia patient sample	bone marrow	c-ALL/Pre-B-ALL with t(9;22)
-	GSM329761	MILES stage 1 data N1_0131	Leukemia patient sample	bone marrow	c-ALL/Pre-B-ALL with t(9;22)
-	GSM329762	MILES stage 1 data N1_0132	Leukemia patient sample	bone marrow	c-ALL/Pre-B-ALL with t(9;22)
-	GSM329763	MILES stage 1 data N1_0133	Leukemia patient sample	peripheral blood	c-ALL/Pre-B-ALL with t(9;22)
-	GSM329764	MILES stage 1 data N1_0134	Leukemia patient sample	bone marrow	c-ALL/Pre-B-ALL with t(9;22)
-	GSM329765	MILES stage 1 data N1_0135	Leukemia patient sample	bone marrow	c-ALL/Pre-B-ALL with t(9;22)
-	GSM329766	MILES stage 1 data N1_0136	Leukemia patient sample	bone marrow	c-ALL/Pre-B-ALL with t(9;22)
-	GSM329767	MILES stage 1 data N1_0137	Leukemia patient sample	bone marrow	c-ALL/Pre-B-ALL with t(9;22)
-	GSM329768	MILES stage 1 data N1_0138	Leukemia patient sample	bone marrow	c-ALL/Pre-B-ALL with t(9;22)
-	GSM329769	MILES stage 1 data N1_0139	Leukemia patient sample	bone marrow	c-ALL/Pre-B-ALL with t(9;22)
-	GSM329770	MILES stage 1 data N1_0140	Leukemia patient sample	bone marrow	c-ALL/Pre-B-ALL with t(9;22)
-	GSM329771	MILES stage 1 data N1_0141	Leukemia patient sample	bone marrow	c-ALL/Pre-B-ALL with t(9;22)
-	GSM329772	MILES stage 1 data N1_0142	Leukemia patient sample	bone marrow	c-ALL/Pre-B-ALL with t(9;22)
-	GSM329773	MILES stage 1 data N1_0143	Leukemia patient sample	bone marrow	c-ALL/Pre-B-ALL with t(9;22)
-	GSM329774	MILES stage 1 data N1_0144	Leukemia patient sample	bone marrow	c-ALL/Pre-B-ALL with t(9;22)
-	GSM329775	MILES stage 1 data N1_0145	Leukemia patient sample	bone marrow	c-ALL/Pre-B-ALL with t(9;22)
-	GSM329776	MILES stage 1 data N1_0146	Leukemia patient sample	bone marrow	c-ALL/Pre-B-ALL with t(9;22)
-	GSM329777	MILES stage 1 data N1_0147	Leukemia patient sample	bone marrow	c-ALL/Pre-B-ALL with t(9;22)
-	GSM329778	MILES stage 1 data N1_0148	Leukemia patient sample	bone marrow	c-ALL/Pre-B-ALL with t(9;22)
-	GSM329779	MILES stage 1 data N1_0149	Leukemia patient sample	bone marrow	c-ALL/Pre-B-ALL with t(9;22)
-	GSM329780	MILES stage 1 data N1_0150	Leukemia patient sample	peripheral blood	c-ALL/Pre-B-ALL with t(9;22)
-	GSM329781	MILES stage 1 data N1_0151	Leukemia patient sample	bone marrow	c-ALL/Pre-B-ALL with t(9;22)
-	GSM329782	MILES stage 1 data N1_0152	Leukemia patient sample	bone marrow	c-ALL/Pre-B-ALL with t(9;22)
-	GSM329783	MILES stage 1 data N1_0153	Leukemia patient sample	peripheral blood	c-ALL/Pre-B-ALL with t(9;22)
-	GSM329784	MILES stage 1 data N1_0154	Leukemia patient sample	bone marrow	c-ALL/Pre-B-ALL with t(9;22)
-	GSM329785	MILES stage 1 data N1_0155	Leukemia patient sample	bone marrow	c-ALL/Pre-B-ALL with t(9;22)
-	GSM329786	MILES stage 1 data N1_0156	Leukemia patient sample	bone marrow	c-ALL/Pre-B-ALL with t(9;22)
-	GSM329787	MILES stage 1 data N1_0157	Leukemia patient sample	bone marrow	c-ALL/Pre-B-ALL with t(9;22)
-	GSM329788	MILES stage 1 data N1_0158	Leukemia patient sample	bone marrow	c-ALL/Pre-B-ALL with t(9;22)
-	GSM329789	MILES stage 1 data N1_0159	Leukemia patient sample	bone marrow	c-ALL/Pre-B-ALL with t(9;22)
-	GSM329790	MILES stage 1 data N1_0160	Leukemia patient sample	bone marrow	c-ALL/Pre-B-ALL with t(9;22)
-	GSM329791	MILES stage 1 data N1_0161	Leukemia patient sample	bone marrow	c-ALL/Pre-B-ALL with t(9;22)
-	GSM329792	MILES stage 1 data N1_0162	Leukemia patient sample	bone marrow	c-ALL/Pre-B-ALL with t(9;22)
-	GSM329793	MILES stage 1 data N1_0163	Leukemia patient sample	bone marrow	c-ALL/Pre-B-ALL with t(9;22)
-	GSM329794	MILES stage 1 data N1_0164	Leukemia patient sample	bone marrow	c-ALL/Pre-B-ALL with t(9;22)
-	GSM329795	MILES stage 1 data N1_0165	Leukemia patient sample	bone marrow	c-ALL/Pre-B-ALL with t(9;22)
-	GSM329796	MILES stage 1 data N1_0166	Leukemia patient sample	bone marrow	c-ALL/Pre-B-ALL with t(9;22)
-	GSM329797	MILES stage 1 data N1_0167	Leukemia patient sample	bone marrow	c-ALL/Pre-B-ALL with t(9;22)
-	GSM329798	MILES stage 1 data N1_0168	Leukemia patient sample	bone marrow	c-ALL/Pre-B-ALL with t(9;22)
-	GSM329799	MILES stage 1 data N1_0169	Leukemia patient sample	bone marrow	c-ALL/Pre-B-ALL with t(9;22)
-	GSM329800	MILES stage 1 data N1_0170	Leukemia patient sample	bone marrow	c-ALL/Pre-B-ALL with t(9;22)
-	GSM329801	MILES stage 1 data N1_0171	Leukemia patient sample	bone marrow	c-ALL/Pre-B-ALL with t(9;22)
-	GSM329802	MILES stage 1 data N1_0172	Leukemia patient sample	bone marrow	c-ALL/Pre-B-ALL with t(9;22)
-	GSM329803	MILES stage 1 data N1_0173	Leukemia patient sample	bone marrow	c-ALL/Pre-B-ALL with t(9;22)
-	GSM329804	MILES stage 1 data N1_0174	Leukemia patient sample	bone marrow	c-ALL/Pre-B-ALL with t(9;22)
-	GSM329805	MILES stage 1 data N1_0175	Leukemia patient sample	peripheral blood	c-ALL/Pre-B-ALL with t(9;22)
-	GSM329806	MILES stage 1 data N1_0176	Leukemia patient sample	bone marrow	c-ALL/Pre-B-ALL with t(9;22)
-	GSM329807	MILES stage 1 data N1_0177	Leukemia patient sample	bone marrow	c-ALL/Pre-B-ALL with t(9;22)
-	GSM329808	MILES stage 1 data N1_0178	Leukemia patient sample	peripheral blood	c-ALL/Pre-B-ALL with t(9;22)
-	GSM329809	MILES stage 1 data N1_0179	Leukemia patient sample	bone marrow	c-ALL/Pre-B-ALL with t(9;22)
-	GSM329810	MILES stage 1 data N1_0180	Leukemia patient sample	bone marrow	c-ALL/Pre-B-ALL with t(9;22)
-	GSM329811	MILES stage 1 data N1_0181	Leukemia patient sample	peripheral blood	c-ALL/Pre-B-ALL with t(9;22)
-	GSM329812	MILES stage 1 data N1_0182	Leukemia patient sample	bone marrow	c-ALL/Pre-B-ALL with t(9;22)
-	GSM329813	MILES stage 1 data N1_0183	Leukemia patient sample	bone marrow	c-ALL/Pre-B-ALL with t(9;22)
-	GSM329814	MILES stage 1 data N1_0184	Leukemia patient sample	bone marrow	c-ALL/Pre-B-ALL with t(9;22)
-	GSM329815	MILES stage 1 data N1_0185	Leukemia patient sample	bone marrow	c-ALL/Pre-B-ALL with t(9;22)
-	GSM329816	MILES stage 1 data N1_0186	Leukemia patient sample	bone marrow	c-ALL/Pre-B-ALL with t(9;22)
-	GSM329817	MILES stage 1 data N1_0187	Leukemia patient sample	bone marrow	c-ALL/Pre-B-ALL with t(9;22)
-	GSM329818	MILES stage 1 data N1_0188	Leukemia patient sample	bone marrow	c-ALL/Pre-B-ALL with t(9;22)
-	GSM329819	MILES stage 1 data N1_0189	Leukemia patient sample	bone marrow	c-ALL/Pre-B-ALL with t(9;22)
-	GSM329820	MILES stage 1 data N1_0190	Leukemia patient sample	bone marrow	c-ALL/Pre-B-ALL with t(9;22)
-	GSM329821	MILES stage 1 data N1_0191	Leukemia patient sample	bone marrow	c-ALL/Pre-B-ALL with t(9;22)
-	GSM329822	MILES stage 1 data N1_0192	Leukemia patient sample	bone marrow	c-ALL/Pre-B-ALL with t(9;22)
-	GSM329823	MILES stage 1 data N1_0193	Leukemia patient sample	bone marrow	c-ALL/Pre-B-ALL with t(9;22)
-	GSM329824	MILES stage 1 data N1_0194	Leukemia patient sample	bone marrow	c-ALL/Pre-B-ALL with t(9;22)
-	GSM329825	MILES stage 1 data N1_0195	Leukemia patient sample	bone marrow	c-ALL/Pre-B-ALL with t(9;22)
-	GSM329826	MILES stage 1 data N1_0196	Leukemia patient sample	bone marrow	c-ALL/Pre-B-ALL with t(9;22)
-	GSM329827	MILES stage 1 data N1_0197	Leukemia patient sample	bone marrow	c-ALL/Pre-B-ALL with t(9;22)
-	GSM329828	MILES stage 1 data N1_0198	Leukemia patient sample	bone marrow	c-ALL/Pre-B-ALL with t(9;22)
-	GSM329829	MILES stage 1 data N1_0199	Leukemia patient sample	bone marrow	c-ALL/Pre-B-ALL with t(9;22)
-	GSM329830	MILES stage 1 data N1_0200	Leukemia patient sample	bone marrow	c-ALL/Pre-B-ALL with t(9;22)
-	GSM329831	MILES stage 1 data N1_0201	Leukemia patient sample	bone marrow	c-ALL/Pre-B-ALL with t(9;22)
-	GSM329832	MILES stage 1 data N1_0202	Leukemia patient sample	bone marrow	c-ALL/Pre-B-ALL with t(9;22)
-	GSM329833	MILES stage 1 data N1_0203	Leukemia patient sample	bone marrow	c-ALL/Pre-B-ALL with t(9;22)
-	GSM329834	MILES stage 1 data N1_0204	Leukemia patient sample	peripheral blood	c-ALL/Pre-B-ALL with t(9;22)
-	GSM329835	MILES stage 1 data N1_0205	Leukemia patient sample	bone marrow	c-ALL/Pre-B-ALL with t(9;22)
-	GSM329836	MILES stage 1 data N1_0206	Leukemia patient sample	bone marrow	T-ALL
-	GSM329837	MILES stage 1 data N1_0207	Leukemia patient sample	bone marrow	T-ALL
-	GSM329838	MILES stage 1 data N1_0208	Leukemia patient sample	bone marrow	T-ALL
-	GSM329839	MILES stage 1 data N1_0209	Leukemia patient sample	bone marrow	T-ALL
-	GSM329840	MILES stage 1 data N1_0210	Leukemia patient sample	bone marrow	T-ALL
-	GSM329841	MILES stage 1 data N1_0211	Leukemia patient sample	bone marrow	T-ALL
-	GSM329842	MILES stage 1 data N1_0212	Leukemia patient sample	bone marrow	T-ALL
-	GSM329843	MILES stage 1 data N1_0213	Leukemia patient sample	peripheral blood	T-ALL
-	GSM329844	MILES stage 1 data N1_0214	Leukemia patient sample	bone marrow	T-ALL
-	GSM329845	MILES stage 1 data N1_0215	Leukemia patient sample	bone marrow	T-ALL
-	GSM329846	MILES stage 1 data N1_0216	Leukemia patient sample	bone marrow	T-ALL
-	GSM329847	MILES stage 1 data N1_0217	Leukemia patient sample	bone marrow	T-ALL
-	GSM329848	MILES stage 1 data N1_0218	Leukemia patient sample	bone marrow	T-ALL
-	GSM329849	MILES stage 1 data N1_0219	Leukemia patient sample	bone marrow	T-ALL
-	GSM329850	MILES stage 1 data N1_0220	Leukemia patient sample	bone marrow	T-ALL
-	GSM329851	MILES stage 1 data N1_0221	Leukemia patient sample	bone marrow	T-ALL
-	GSM329852	MILES stage 1 data N1_0222	Leukemia patient sample	bone marrow	T-ALL
-	GSM329853	MILES stage 1 data N1_0223	Leukemia patient sample	bone marrow	T-ALL
-	GSM329854	MILES stage 1 data N1_0224	Leukemia patient sample	bone marrow	T-ALL
-	GSM329855	MILES stage 1 data N1_0225	Leukemia patient sample	bone marrow	T-ALL
-	GSM329856	MILES stage 1 data N1_0226	Leukemia patient sample	peripheral blood	T-ALL
-	GSM329857	MILES stage 1 data N1_0227	Leukemia patient sample	bone marrow	T-ALL
-	GSM329858	MILES stage 1 data N1_0228	Leukemia patient sample	bone marrow	T-ALL
-	GSM329859	MILES stage 1 data N1_0229	Leukemia patient sample	bone marrow	T-ALL
-	GSM329860	MILES stage 1 data N1_0230	Leukemia patient sample	bone marrow	T-ALL
-	GSM329861	MILES stage 1 data N1_0231	Leukemia patient sample	bone marrow	T-ALL
-	GSM329862	MILES stage 1 data N1_0232	Leukemia patient sample	bone marrow	T-ALL
-	GSM329863	MILES stage 1 data N1_0233	Leukemia patient sample	bone marrow	T-ALL
-	GSM329864	MILES stage 1 data N1_0234	Leukemia patient sample	bone marrow	T-ALL
-	GSM329865	MILES stage 1 data N1_0235	Leukemia patient sample	bone marrow	T-ALL
-	GSM329866	MILES stage 1 data N1_0236	Leukemia patient sample	bone marrow	T-ALL
-	GSM329867	MILES stage 1 data N1_0237	Leukemia patient sample	bone marrow	T-ALL
-	GSM329868	MILES stage 1 data N1_0238	Leukemia patient sample	bone marrow	T-ALL
-	GSM329869	MILES stage 1 data N1_0239	Leukemia patient sample	bone marrow	T-ALL
-	GSM329870	MILES stage 1 data N1_0240	Leukemia patient sample	bone marrow	T-ALL
-	GSM329871	MILES stage 1 data N1_0241	Leukemia patient sample	bone marrow	T-ALL
-	GSM329872	MILES stage 1 data N1_0242	Leukemia patient sample	bone marrow	T-ALL
-	GSM329873	MILES stage 1 data N1_0243	Leukemia patient sample	bone marrow	T-ALL
-	GSM329874	MILES stage 1 data N1_0244	Leukemia patient sample	bone marrow	T-ALL
-	GSM329875	MILES stage 1 data N1_0245	Leukemia patient sample	bone marrow	T-ALL
-	GSM329876	MILES stage 1 data N1_0246	Leukemia patient sample	bone marrow	T-ALL
-	GSM329877	MILES stage 1 data N1_0247	Leukemia patient sample	bone marrow	T-ALL
-	GSM329878	MILES stage 1 data N1_0248	Leukemia patient sample	bone marrow	T-ALL
-	GSM329879	MILES stage 1 data N1_0249	Leukemia patient sample	bone marrow	T-ALL
-	GSM329880	MILES stage 1 data N1_0250	Leukemia patient sample	bone marrow	T-ALL
-	GSM329881	MILES stage 1 data N1_0251	Leukemia patient sample	bone marrow	T-ALL
-	GSM329882	MILES stage 1 data N1_0252	Leukemia patient sample	bone marrow	T-ALL
-	GSM329883	MILES stage 1 data N1_0253	Leukemia patient sample	bone marrow	T-ALL
-	GSM329884	MILES stage 1 data N1_0254	Leukemia patient sample	bone marrow	T-ALL
-	GSM329885	MILES stage 1 data N1_0255	Leukemia patient sample	bone marrow	T-ALL
-	GSM329886	MILES stage 1 data N1_0256	Leukemia patient sample	bone marrow	T-ALL
-	GSM329887	MILES stage 1 data N1_0257	Leukemia patient sample	bone marrow	T-ALL
-	GSM329888	MILES stage 1 data N1_0258	Leukemia patient sample	bone marrow	T-ALL
-	GSM329889	MILES stage 1 data N1_0259	Leukemia patient sample	bone marrow	T-ALL
-	GSM329890	MILES stage 1 data N1_0260	Leukemia patient sample	bone marrow	T-ALL
-	GSM329891	MILES stage 1 data N1_0261	Leukemia patient sample	bone marrow	T-ALL
-	GSM329892	MILES stage 1 data N1_0262	Leukemia patient sample	bone marrow	T-ALL
-	GSM329893	MILES stage 1 data N1_0263	Leukemia patient sample	bone marrow	T-ALL
-	GSM329894	MILES stage 1 data N1_0264	Leukemia patient sample	bone marrow	T-ALL
-	GSM329895	MILES stage 1 data N1_0265	Leukemia patient sample	bone marrow	T-ALL
-	GSM329896	MILES stage 1 data N1_0266	Leukemia patient sample	bone marrow	T-ALL
-	GSM329897	MILES stage 1 data N1_0267	Leukemia patient sample	bone marrow	T-ALL
-	GSM329898	MILES stage 1 data N1_0268	Leukemia patient sample	bone marrow	T-ALL
-	GSM329899	MILES stage 1 data N1_0269	Leukemia patient sample	bone marrow	T-ALL
-	GSM329900	MILES stage 1 data N1_0270	Leukemia patient sample	bone marrow	T-ALL
-	GSM329901	MILES stage 1 data N1_0271	Leukemia patient sample	bone marrow	T-ALL
-	GSM329902	MILES stage 1 data N1_0272	Leukemia patient sample	bone marrow	T-ALL
-	GSM329903	MILES stage 1 data N1_0273	Leukemia patient sample	peripheral blood	T-ALL
-	GSM329904	MILES stage 1 data N1_0274	Leukemia patient sample	bone marrow	T-ALL
-	GSM329905	MILES stage 1 data N1_0275	Leukemia patient sample	bone marrow	T-ALL
-	GSM329906	MILES stage 1 data N1_0276	Leukemia patient sample	bone marrow	T-ALL
-	GSM329907	MILES stage 1 data N1_0277	Leukemia patient sample	bone marrow	T-ALL
-	GSM329908	MILES stage 1 data N1_0278	Leukemia patient sample	bone marrow	T-ALL
-	GSM329909	MILES stage 1 data N1_0279	Leukemia patient sample	bone marrow	T-ALL
-	GSM329910	MILES stage 1 data N1_0280	Leukemia patient sample	bone marrow	T-ALL
-	GSM329911	MILES stage 1 data N1_0281	Leukemia patient sample	bone marrow	T-ALL
-	GSM329912	MILES stage 1 data N1_0282	Leukemia patient sample	bone marrow	T-ALL
-	GSM329913	MILES stage 1 data N1_0283	Leukemia patient sample	bone marrow	T-ALL
-	GSM329914	MILES stage 1 data N1_0284	Leukemia patient sample	bone marrow	T-ALL
-	GSM329915	MILES stage 1 data N1_0285	Leukemia patient sample	bone marrow	T-ALL
-	GSM329916	MILES stage 1 data N1_0286	Leukemia patient sample	bone marrow	T-ALL
-	GSM329917	MILES stage 1 data N1_0287	Leukemia patient sample	bone marrow	T-ALL
-	GSM329918	MILES stage 1 data N1_0288	Leukemia patient sample	bone marrow	T-ALL
-	GSM329919	MILES stage 1 data N1_0289	Leukemia patient sample	bone marrow	T-ALL
-	GSM329920	MILES stage 1 data N1_0290	Leukemia patient sample	bone marrow	T-ALL
-	GSM329921	MILES stage 1 data N1_0291	Leukemia patient sample	bone marrow	T-ALL
-	GSM329922	MILES stage 1 data N1_0292	Leukemia patient sample	bone marrow	T-ALL
-	GSM329923	MILES stage 1 data N1_0293	Leukemia patient sample	bone marrow	T-ALL
-	GSM329924	MILES stage 1 data N1_0294	Leukemia patient sample	bone marrow	T-ALL
-	GSM329925	MILES stage 1 data N1_0295	Leukemia patient sample	bone marrow	T-ALL
-	GSM329926	MILES stage 1 data N1_0296	Leukemia patient sample	bone marrow	T-ALL
-	GSM329927	MILES stage 1 data N1_0297	Leukemia patient sample	bone marrow	T-ALL
-	GSM329928	MILES stage 1 data N1_0298	Leukemia patient sample	bone marrow	T-ALL
-	GSM329929	MILES stage 1 data N1_0299	Leukemia patient sample	bone marrow	T-ALL
-	GSM329930	MILES stage 1 data N1_0300	Leukemia patient sample	bone marrow	T-ALL
-	GSM329931	MILES stage 1 data N1_0301	Leukemia patient sample	bone marrow	T-ALL
-	GSM329932	MILES stage 1 data N1_0302	Leukemia patient sample	bone marrow	T-ALL
-	GSM329933	MILES stage 1 data N1_0303	Leukemia patient sample	bone marrow	T-ALL
-	GSM329934	MILES stage 1 data N1_0304	Leukemia patient sample	bone marrow	T-ALL
-	GSM329935	MILES stage 1 data N1_0305	Leukemia patient sample	bone marrow	T-ALL
-	GSM329936	MILES stage 1 data N1_0306	Leukemia patient sample	bone marrow	T-ALL
-	GSM329937	MILES stage 1 data N1_0307	Leukemia patient sample	bone marrow	T-ALL
-	GSM329938	MILES stage 1 data N1_0308	Leukemia patient sample	bone marrow	T-ALL
-	GSM329939	MILES stage 1 data N1_0309	Leukemia patient sample	bone marrow	T-ALL
-	GSM329940	MILES stage 1 data N1_0310	Leukemia patient sample	bone marrow	T-ALL
-	GSM329941	MILES stage 1 data N1_0311	Leukemia patient sample	bone marrow	T-ALL
-	GSM329942	MILES stage 1 data N1_0312	Leukemia patient sample	bone marrow	T-ALL
-	GSM329943	MILES stage 1 data N1_0313	Leukemia patient sample	bone marrow	T-ALL
-	GSM329944	MILES stage 1 data N1_0314	Leukemia patient sample	bone marrow	T-ALL
-	GSM329945	MILES stage 1 data N1_0315	Leukemia patient sample	bone marrow	T-ALL
-	GSM329946	MILES stage 1 data N1_0316	Leukemia patient sample	bone marrow	T-ALL
-	GSM329947	MILES stage 1 data N1_0317	Leukemia patient sample	bone marrow	T-ALL
-	GSM329948	MILES stage 1 data N1_0318	Leukemia patient sample	bone marrow	T-ALL
-	GSM329949	MILES stage 1 data N1_0319	Leukemia patient sample	bone marrow	T-ALL
-	GSM329950	MILES stage 1 data N1_0320	Leukemia patient sample	bone marrow	T-ALL
-	GSM329951	MILES stage 1 data N1_0321	Leukemia patient sample	bone marrow	T-ALL
-	GSM329952	MILES stage 1 data N1_0322	Leukemia patient sample	bone marrow	T-ALL
-	GSM329953	MILES stage 1 data N1_0323	Leukemia patient sample	bone marrow	T-ALL
-	GSM329954	MILES stage 1 data N1_0324	Leukemia patient sample	bone marrow	T-ALL
-	GSM329955	MILES stage 1 data N1_0325	Leukemia patient sample	bone marrow	T-ALL
-	GSM329956	MILES stage 1 data N1_0326	Leukemia patient sample	bone marrow	T-ALL
-	GSM329957	MILES stage 1 data N1_0327	Leukemia patient sample	bone marrow	T-ALL
-	GSM329958	MILES stage 1 data N1_0328	Leukemia patient sample	peripheral blood	T-ALL
-	GSM329959	MILES stage 1 data N1_0329	Leukemia patient sample	bone marrow	T-ALL
-	GSM329960	MILES stage 1 data N1_0330	Leukemia patient sample	bone marrow	T-ALL
-	GSM329961	MILES stage 1 data N1_0331	Leukemia patient sample	bone marrow	T-ALL
-	GSM329962	MILES stage 1 data N1_0332	Leukemia patient sample	bone marrow	T-ALL
-	GSM329963	MILES stage 1 data N1_0333	Leukemia patient sample	bone marrow	T-ALL
-	GSM329964	MILES stage 1 data N1_0334	Leukemia patient sample	bone marrow	T-ALL
-	GSM329965	MILES stage 1 data N1_0335	Leukemia patient sample	bone marrow	T-ALL
-	GSM329966	MILES stage 1 data N1_0336	Leukemia patient sample	bone marrow	T-ALL
-	GSM329967	MILES stage 1 data N1_0337	Leukemia patient sample	bone marrow	T-ALL
-	GSM329968	MILES stage 1 data N1_0338	Leukemia patient sample	bone marrow	T-ALL
-	GSM329969	MILES stage 1 data N1_0339	Leukemia patient sample	bone marrow	T-ALL
-	GSM329970	MILES stage 1 data N1_0340	Leukemia patient sample	bone marrow	T-ALL
-	GSM329971	MILES stage 1 data N1_0341	Leukemia patient sample	bone marrow	T-ALL
-	GSM329972	MILES stage 1 data N1_0342	Leukemia patient sample	bone marrow	T-ALL
-	GSM329973	MILES stage 1 data N1_0343	Leukemia patient sample	bone marrow	T-ALL
-	GSM329974	MILES stage 1 data N1_0344	Leukemia patient sample	bone marrow	T-ALL
-	GSM329975	MILES stage 1 data N1_0345	Leukemia patient sample	bone marrow	T-ALL
-	GSM329976	MILES stage 1 data N1_0346	Leukemia patient sample	bone marrow	T-ALL
-	GSM329977	MILES stage 1 data N1_0347	Leukemia patient sample	bone marrow	T-ALL
-	GSM329978	MILES stage 1 data N1_0348	Leukemia patient sample	bone marrow	T-ALL
-	GSM329979	MILES stage 1 data N1_0349	Leukemia patient sample	bone marrow	T-ALL
-	GSM329980	MILES stage 1 data N1_0350	Leukemia patient sample	bone marrow	T-ALL
-	GSM329981	MILES stage 1 data N1_0351	Leukemia patient sample	bone marrow	T-ALL
-	GSM329982	MILES stage 1 data N1_0352	Leukemia patient sample	bone marrow	T-ALL
-	GSM329983	MILES stage 1 data N1_0353	Leukemia patient sample	bone marrow	T-ALL
-	GSM329984	MILES stage 1 data N1_0354	Leukemia patient sample	bone marrow	T-ALL
-	GSM329985	MILES stage 1 data N1_0355	Leukemia patient sample	bone marrow	T-ALL
-	GSM329986	MILES stage 1 data N1_0356	Leukemia patient sample	bone marrow	T-ALL
-	GSM329987	MILES stage 1 data N1_0357	Leukemia patient sample	bone marrow	T-ALL
-	GSM329988	MILES stage 1 data N1_0358	Leukemia patient sample	bone marrow	T-ALL
-	GSM329989	MILES stage 1 data N1_0359	Leukemia patient sample	bone marrow	T-ALL
-	GSM329990	MILES stage 1 data N1_0360	Leukemia patient sample	bone marrow	T-ALL
-	GSM329991	MILES stage 1 data N1_0361	Leukemia patient sample	bone marrow	T-ALL
-	GSM329992	MILES stage 1 data N1_0362	Leukemia patient sample	bone marrow	T-ALL
-	GSM329993	MILES stage 1 data N1_0363	Leukemia patient sample	bone marrow	T-ALL
-	GSM329994	MILES stage 1 data N1_0364	Leukemia patient sample	bone marrow	T-ALL
-	GSM329995	MILES stage 1 data N1_0365	Leukemia patient sample	bone marrow	T-ALL
-	GSM329996	MILES stage 1 data N1_0366	Leukemia patient sample	bone marrow	T-ALL
-	GSM329997	MILES stage 1 data N1_0367	Leukemia patient sample	bone marrow	T-ALL
-	GSM329998	MILES stage 1 data N1_0368	Leukemia patient sample	bone marrow	T-ALL
-	GSM329999	MILES stage 1 data N1_0369	Leukemia patient sample	bone marrow	T-ALL
-	GSM330000	MILES stage 1 data N1_0370	Leukemia patient sample	bone marrow	T-ALL
-	GSM330001	MILES stage 1 data N1_0371	Leukemia patient sample	bone marrow	T-ALL
-	GSM330002	MILES stage 1 data N1_0372	Leukemia patient sample	bone marrow	T-ALL
-	GSM330003	MILES stage 1 data N1_0373	Leukemia patient sample	bone marrow	T-ALL
-	GSM330004	MILES stage 1 data N1_0374	Leukemia patient sample	bone marrow	T-ALL
-	GSM330005	MILES stage 1 data N1_0375	Leukemia patient sample	bone marrow	T-ALL
-	GSM330006	MILES stage 1 data N1_0376	Leukemia patient sample	bone marrow	T-ALL
-	GSM330007	MILES stage 1 data N1_0377	Leukemia patient sample	bone marrow	T-ALL
-	GSM330008	MILES stage 1 data N1_0378	Leukemia patient sample	bone marrow	T-ALL
-	GSM330009	MILES stage 1 data N1_0379	Leukemia patient sample	bone marrow	T-ALL
-	GSM330010	MILES stage 1 data N1_0380	Leukemia patient sample	bone marrow	ALL with t(12;21)
-	GSM330011	MILES stage 1 data N1_0381	Leukemia patient sample	bone marrow	ALL with t(12;21)
-	GSM330012	MILES stage 1 data N1_0382	Leukemia patient sample	bone marrow	ALL with t(12;21)
-	GSM330013	MILES stage 1 data N1_0383	Leukemia patient sample	bone marrow	ALL with t(12;21)
-	GSM330014	MILES stage 1 data N1_0384	Leukemia patient sample	bone marrow	ALL with t(12;21)
-	GSM330015	MILES stage 1 data N1_0385	Leukemia patient sample	bone marrow	ALL with t(12;21)
-	GSM330016	MILES stage 1 data N1_0386	Leukemia patient sample	bone marrow	ALL with t(12;21)
-	GSM330017	MILES stage 1 data N1_0387	Leukemia patient sample	bone marrow	ALL with t(12;21)
-	GSM330018	MILES stage 1 data N1_0388	Leukemia patient sample	bone marrow	ALL with t(12;21)
-	GSM330019	MILES stage 1 data N1_0389	Leukemia patient sample	bone marrow	ALL with t(12;21)
-	GSM330020	MILES stage 1 data N1_0390	Leukemia patient sample	bone marrow	ALL with t(12;21)
-	GSM330021	MILES stage 1 data N1_0391	Leukemia patient sample	bone marrow	ALL with t(12;21)
-	GSM330022	MILES stage 1 data N1_0392	Leukemia patient sample	bone marrow	ALL with t(12;21)
-	GSM330023	MILES stage 1 data N1_0393	Leukemia patient sample	bone marrow	ALL with t(12;21)
-	GSM330024	MILES stage 1 data N1_0394	Leukemia patient sample	bone marrow	ALL with t(12;21)
-	GSM330025	MILES stage 1 data N1_0395	Leukemia patient sample	bone marrow	ALL with t(12;21)
-	GSM330026	MILES stage 1 data N1_0396	Leukemia patient sample	bone marrow	ALL with t(12;21)
-	GSM330027	MILES stage 1 data N1_0397	Leukemia patient sample	bone marrow	ALL with t(12;21)
-	GSM330028	MILES stage 1 data N1_0398	Leukemia patient sample	bone marrow	ALL with t(12;21)
-	GSM330029	MILES stage 1 data N1_0399	Leukemia patient sample	bone marrow	ALL with t(12;21)
-	GSM330030	MILES stage 1 data N1_0400	Leukemia patient sample	bone marrow	ALL with t(12;21)
-	GSM330031	MILES stage 1 data N1_0401	Leukemia patient sample	bone marrow	ALL with t(12;21)
-	GSM330032	MILES stage 1 data N1_0402	Leukemia patient sample	bone marrow	ALL with t(12;21)
-	GSM330033	MILES stage 1 data N1_0403	Leukemia patient sample	bone marrow	ALL with t(12;21)
-	GSM330034	MILES stage 1 data N1_0404	Leukemia patient sample	bone marrow	ALL with t(12;21)
-	GSM330035	MILES stage 1 data N1_0405	Leukemia patient sample	bone marrow	ALL with t(12;21)
-	GSM330036	MILES stage 1 data N1_0406	Leukemia patient sample	bone marrow	ALL with t(12;21)
-	GSM330037	MILES stage 1 data N1_0407	Leukemia patient sample	bone marrow	ALL with t(12;21)
-	GSM330038	MILES stage 1 data N1_0408	Leukemia patient sample	bone marrow	ALL with t(12;21)
-	GSM330039	MILES stage 1 data N1_0409	Leukemia patient sample	bone marrow	ALL with t(12;21)
-	GSM330040	MILES stage 1 data N1_0410	Leukemia patient sample	bone marrow	ALL with t(12;21)
-	GSM330041	MILES stage 1 data N1_0411	Leukemia patient sample	bone marrow	ALL with t(12;21)
-	GSM330042	MILES stage 1 data N1_0412	Leukemia patient sample	bone marrow	ALL with t(12;21)
-	GSM330043	MILES stage 1 data N1_0413	Leukemia patient sample	bone marrow	ALL with t(12;21)
-	GSM330044	MILES stage 1 data N1_0414	Leukemia patient sample	bone marrow	ALL with t(12;21)
-	GSM330045	MILES stage 1 data N1_0415	Leukemia patient sample	bone marrow	ALL with t(12;21)
-	GSM330046	MILES stage 1 data N1_0416	Leukemia patient sample	bone marrow	ALL with t(12;21)
-	GSM330047	MILES stage 1 data N1_0417	Leukemia patient sample	bone marrow	ALL with t(12;21)
-	GSM330048	MILES stage 1 data N1_0418	Leukemia patient sample	bone marrow	ALL with t(12;21)
-	GSM330049	MILES stage 1 data N1_0419	Leukemia patient sample	bone marrow	ALL with t(12;21)
-	GSM330050	MILES stage 1 data N1_0420	Leukemia patient sample	bone marrow	ALL with t(12;21)
-	GSM330051	MILES stage 1 data N1_0421	Leukemia patient sample	bone marrow	ALL with t(12;21)
-	GSM330052	MILES stage 1 data N1_0422	Leukemia patient sample	bone marrow	ALL with t(12;21)
-	GSM330053	MILES stage 1 data N1_0423	Leukemia patient sample	bone marrow	ALL with t(12;21)
-	GSM330054	MILES stage 1 data N1_0424	Leukemia patient sample	bone marrow	ALL with t(12;21)
-	GSM330055	MILES stage 1 data N1_0425	Leukemia patient sample	bone marrow	ALL with t(12;21)
-	GSM330056	MILES stage 1 data N1_0426	Leukemia patient sample	bone marrow	ALL with t(12;21)
-	GSM330057	MILES stage 1 data N1_0427	Leukemia patient sample	bone marrow	ALL with t(12;21)
-	GSM330058	MILES stage 1 data N1_0428	Leukemia patient sample	bone marrow	ALL with t(12;21)
-	GSM330059	MILES stage 1 data N1_0429	Leukemia patient sample	bone marrow	ALL with t(12;21)
-	GSM330060	MILES stage 1 data N1_0430	Leukemia patient sample	bone marrow	ALL with t(12;21)
-	GSM330061	MILES stage 1 data N1_0431	Leukemia patient sample	bone marrow	ALL with t(12;21)
-	GSM330062	MILES stage 1 data N1_0432	Leukemia patient sample	bone marrow	ALL with t(12;21)
-	GSM330063	MILES stage 1 data N1_0433	Leukemia patient sample	bone marrow	ALL with t(12;21)
-	GSM330064	MILES stage 1 data N1_0434	Leukemia patient sample	bone marrow	ALL with t(12;21)
-	GSM330065	MILES stage 1 data N1_0435	Leukemia patient sample	bone marrow	ALL with t(12;21)
-	GSM330066	MILES stage 1 data N1_0436	Leukemia patient sample	bone marrow	ALL with t(12;21)
-	GSM330067	MILES stage 1 data N1_0437	Leukemia patient sample	bone marrow	ALL with t(12;21)
-	GSM330068	MILES stage 1 data N1_0438	Leukemia patient sample	bone marrow	ALL with t(1;19)
-	GSM330069	MILES stage 1 data N1_0439	Leukemia patient sample	bone marrow	ALL with t(1;19)
-	GSM330070	MILES stage 1 data N1_0440	Leukemia patient sample	peripheral blood	ALL with t(1;19)
-	GSM330071	MILES stage 1 data N1_0441	Leukemia patient sample	bone marrow	ALL with t(1;19)
-	GSM330072	MILES stage 1 data N1_0442	Leukemia patient sample	bone marrow	ALL with t(1;19)
-	GSM330073	MILES stage 1 data N1_0443	Leukemia patient sample	bone marrow	ALL with t(1;19)
-	GSM330074	MILES stage 1 data N1_0444	Leukemia patient sample	bone marrow	ALL with t(1;19)
-	GSM330075	MILES stage 1 data N1_0445	Leukemia patient sample	bone marrow	ALL with t(1;19)
-	GSM330076	MILES stage 1 data N1_0446	Leukemia patient sample	bone marrow	ALL with t(1;19)
-	GSM330077	MILES stage 1 data N1_0447	Leukemia patient sample	bone marrow	ALL with t(1;19)
-	GSM330078	MILES stage 1 data N1_0448	Leukemia patient sample	bone marrow	ALL with t(1;19)
-	GSM330079	MILES stage 1 data N1_0449	Leukemia patient sample	bone marrow	ALL with t(1;19)
-	GSM330080	MILES stage 1 data N1_0450	Leukemia patient sample	bone marrow	ALL with t(1;19)
-	GSM330081	MILES stage 1 data N1_0451	Leukemia patient sample	bone marrow	ALL with t(1;19)
-	GSM330082	MILES stage 1 data N1_0452	Leukemia patient sample	bone marrow	ALL with t(1;19)
-	GSM330083	MILES stage 1 data N1_0453	Leukemia patient sample	peripheral blood	ALL with t(1;19)
-	GSM330084	MILES stage 1 data N1_0454	Leukemia patient sample	bone marrow	ALL with t(1;19)
-	GSM330085	MILES stage 1 data N1_0455	Leukemia patient sample	bone marrow	ALL with t(1;19)
-	GSM330086	MILES stage 1 data N1_0456	Leukemia patient sample	peripheral blood	ALL with t(1;19)
-	GSM330087	MILES stage 1 data N1_0457	Leukemia patient sample	bone marrow	ALL with t(1;19)
-	GSM330088	MILES stage 1 data N1_0458	Leukemia patient sample	bone marrow	ALL with t(1;19)
-	GSM330089	MILES stage 1 data N1_0459	Leukemia patient sample	bone marrow	ALL with t(1;19)
-	GSM330090	MILES stage 1 data N1_0460	Leukemia patient sample	bone marrow	ALL with t(1;19)
-	GSM330091	MILES stage 1 data N1_0461	Leukemia patient sample	bone marrow	ALL with t(1;19)
-	GSM330092	MILES stage 1 data N1_0462	Leukemia patient sample	bone marrow	ALL with t(1;19)
-	GSM330093	MILES stage 1 data N1_0463	Leukemia patient sample	bone marrow	ALL with t(1;19)
-	GSM330094	MILES stage 1 data N1_0464	Leukemia patient sample	bone marrow	ALL with t(1;19)
-	GSM330095	MILES stage 1 data N1_0465	Leukemia patient sample	bone marrow	ALL with t(1;19)
-	GSM330096	MILES stage 1 data N1_0466	Leukemia patient sample	bone marrow	ALL with t(1;19)
-	GSM330097	MILES stage 1 data N1_0467	Leukemia patient sample	bone marrow	ALL with t(1;19)
-	GSM330098	MILES stage 1 data N1_0468	Leukemia patient sample	bone marrow	ALL with t(1;19)
-	GSM330099	MILES stage 1 data N1_0469	Leukemia patient sample	bone marrow	ALL with t(1;19)
-	GSM330100	MILES stage 1 data N1_0470	Leukemia patient sample	bone marrow	ALL with t(1;19)
-	GSM330101	MILES stage 1 data N1_0471	Leukemia patient sample	bone marrow	ALL with t(1;19)
-	GSM330102	MILES stage 1 data N1_0472	Leukemia patient sample	bone marrow	ALL with t(1;19)
-	GSM330103	MILES stage 1 data N1_0473	Leukemia patient sample	bone marrow	ALL with t(1;19)
-	GSM330104	MILES stage 1 data N1_0474	Leukemia patient sample	peripheral blood	ALL with hyperdiploid karyotype
-	GSM330105	MILES stage 1 data N1_0475	Leukemia patient sample	bone marrow	ALL with hyperdiploid karyotype
-	GSM330106	MILES stage 1 data N1_0476	Leukemia patient sample	bone marrow	ALL with hyperdiploid karyotype
-	GSM330107	MILES stage 1 data N1_0477	Leukemia patient sample	bone marrow	ALL with hyperdiploid karyotype
-	GSM330108	MILES stage 1 data N1_0478	Leukemia patient sample	bone marrow	ALL with hyperdiploid karyotype
-	GSM330109	MILES stage 1 data N1_0479	Leukemia patient sample	bone marrow	ALL with hyperdiploid karyotype
-	GSM330110	MILES stage 1 data N1_0480	Leukemia patient sample	bone marrow	ALL with hyperdiploid karyotype
-	GSM330111	MILES stage 1 data N1_0481	Leukemia patient sample	bone marrow	ALL with hyperdiploid karyotype
-	GSM330112	MILES stage 1 data N1_0482	Leukemia patient sample	bone marrow	ALL with hyperdiploid karyotype
-	GSM330113	MILES stage 1 data N1_0483	Leukemia patient sample	bone marrow	ALL with hyperdiploid karyotype
-	GSM330114	MILES stage 1 data N1_0484	Leukemia patient sample	bone marrow	ALL with hyperdiploid karyotype
-	GSM330115	MILES stage 1 data N1_0485	Leukemia patient sample	bone marrow	ALL with hyperdiploid karyotype
-	GSM330116	MILES stage 1 data N1_0486	Leukemia patient sample	bone marrow	ALL with hyperdiploid karyotype
-	GSM330117	MILES stage 1 data N1_0487	Leukemia patient sample	bone marrow	ALL with hyperdiploid karyotype
-	GSM330118	MILES stage 1 data N1_0488	Leukemia patient sample	bone marrow	ALL with hyperdiploid karyotype
-	GSM330119	MILES stage 1 data N1_0489	Leukemia patient sample	bone marrow	ALL with hyperdiploid karyotype
-	GSM330120	MILES stage 1 data N1_0490	Leukemia patient sample	bone marrow	ALL with hyperdiploid karyotype
-	GSM330121	MILES stage 1 data N1_0491	Leukemia patient sample	bone marrow	ALL with hyperdiploid karyotype
-	GSM330122	MILES stage 1 data N1_0492	Leukemia patient sample	bone marrow	ALL with hyperdiploid karyotype
-	GSM330123	MILES stage 1 data N1_0493	Leukemia patient sample	bone marrow	ALL with hyperdiploid karyotype
-	GSM330124	MILES stage 1 data N1_0494	Leukemia patient sample	bone marrow	ALL with hyperdiploid karyotype
-	GSM330125	MILES stage 1 data N1_0495	Leukemia patient sample	bone marrow	ALL with hyperdiploid karyotype
-	GSM330126	MILES stage 1 data N1_0496	Leukemia patient sample	bone marrow	ALL with hyperdiploid karyotype
-	GSM330127	MILES stage 1 data N1_0497	Leukemia patient sample	bone marrow	ALL with hyperdiploid karyotype
-	GSM330128	MILES stage 1 data N1_0498	Leukemia patient sample	bone marrow	ALL with hyperdiploid karyotype
-	GSM330129	MILES stage 1 data N1_0499	Leukemia patient sample	bone marrow	ALL with hyperdiploid karyotype
-	GSM330130	MILES stage 1 data N1_0500	Leukemia patient sample	bone marrow	ALL with hyperdiploid karyotype
-	GSM330131	MILES stage 1 data N1_0501	Leukemia patient sample	bone marrow	ALL with hyperdiploid karyotype
-	GSM330132	MILES stage 1 data N1_0502	Leukemia patient sample	bone marrow	ALL with hyperdiploid karyotype
-	GSM330133	MILES stage 1 data N1_0503	Leukemia patient sample	bone marrow	ALL with hyperdiploid karyotype
-	GSM330134	MILES stage 1 data N1_0504	Leukemia patient sample	bone marrow	ALL with hyperdiploid karyotype
-	GSM330135	MILES stage 1 data N1_0505	Leukemia patient sample	bone marrow	ALL with hyperdiploid karyotype
-	GSM330136	MILES stage 1 data N1_0506	Leukemia patient sample	bone marrow	ALL with hyperdiploid karyotype
-	GSM330137	MILES stage 1 data N1_0507	Leukemia patient sample	bone marrow	ALL with hyperdiploid karyotype
-	GSM330138	MILES stage 1 data N1_0508	Leukemia patient sample	bone marrow	ALL with hyperdiploid karyotype
-	GSM330139	MILES stage 1 data N1_0509	Leukemia patient sample	bone marrow	ALL with hyperdiploid karyotype
-	GSM330140	MILES stage 1 data N1_0510	Leukemia patient sample	bone marrow	ALL with hyperdiploid karyotype
-	GSM330141	MILES stage 1 data N1_0511	Leukemia patient sample	bone marrow	ALL with hyperdiploid karyotype
-	GSM330142	MILES stage 1 data N1_0512	Leukemia patient sample	bone marrow	ALL with hyperdiploid karyotype
-	GSM330143	MILES stage 1 data N1_0513	Leukemia patient sample	bone marrow	ALL with hyperdiploid karyotype
-	GSM330144	MILES stage 1 data N1_0514	Leukemia patient sample	bone marrow	c-ALL/Pre-B-ALL without t(9;22)
-	GSM330145	MILES stage 1 data N1_0515	Leukemia patient sample	bone marrow	c-ALL/Pre-B-ALL without t(9;22)
-	GSM330146	MILES stage 1 data N1_0516	Leukemia patient sample	bone marrow	c-ALL/Pre-B-ALL without t(9;22)
-	GSM330147	MILES stage 1 data N1_0517	Leukemia patient sample	bone marrow	c-ALL/Pre-B-ALL without t(9;22)
-	GSM330148	MILES stage 1 data N1_0518	Leukemia patient sample	bone marrow	c-ALL/Pre-B-ALL without t(9;22)
-	GSM330149	MILES stage 1 data N1_0519	Leukemia patient sample	bone marrow	c-ALL/Pre-B-ALL without t(9;22)
-	GSM330150	MILES stage 1 data N1_0520	Leukemia patient sample	bone marrow	c-ALL/Pre-B-ALL without t(9;22)
-	GSM330151	MILES stage 1 data N1_0521	Leukemia patient sample	bone marrow	c-ALL/Pre-B-ALL without t(9;22)
-	GSM330152	MILES stage 1 data N1_0522	Leukemia patient sample	bone marrow	c-ALL/Pre-B-ALL without t(9;22)
-	GSM330153	MILES stage 1 data N1_0523	Leukemia patient sample	bone marrow	c-ALL/Pre-B-ALL without t(9;22)
-	GSM330154	MILES stage 1 data N1_0524	Leukemia patient sample	bone marrow	c-ALL/Pre-B-ALL without t(9;22)
-	GSM330155	MILES stage 1 data N1_0525	Leukemia patient sample	bone marrow	c-ALL/Pre-B-ALL without t(9;22)
-	GSM330156	MILES stage 1 data N1_0526	Leukemia patient sample	bone marrow	c-ALL/Pre-B-ALL without t(9;22)
-	GSM330157	MILES stage 1 data N1_0527	Leukemia patient sample	bone marrow	c-ALL/Pre-B-ALL without t(9;22)
-	GSM330158	MILES stage 1 data N1_0528	Leukemia patient sample	bone marrow	c-ALL/Pre-B-ALL without t(9;22)
-	GSM330159	MILES stage 1 data N1_0529	Leukemia patient sample	bone marrow	c-ALL/Pre-B-ALL without t(9;22)
-	GSM330160	MILES stage 1 data N1_0530	Leukemia patient sample	peripheral blood	c-ALL/Pre-B-ALL without t(9;22)
-	GSM330161	MILES stage 1 data N1_0531	Leukemia patient sample	bone marrow	c-ALL/Pre-B-ALL without t(9;22)
-	GSM330162	MILES stage 1 data N1_0532	Leukemia patient sample	bone marrow	c-ALL/Pre-B-ALL without t(9;22)
-	GSM330163	MILES stage 1 data N1_0533	Leukemia patient sample	bone marrow	c-ALL/Pre-B-ALL without t(9;22)
-	GSM330164	MILES stage 1 data N1_0534	Leukemia patient sample	bone marrow	c-ALL/Pre-B-ALL without t(9;22)
-	GSM330165	MILES stage 1 data N1_0535	Leukemia patient sample	bone marrow	c-ALL/Pre-B-ALL without t(9;22)
-	GSM330166	MILES stage 1 data N1_0536	Leukemia patient sample	bone marrow	c-ALL/Pre-B-ALL without t(9;22)
-	GSM330167	MILES stage 1 data N1_0537	Leukemia patient sample	bone marrow	c-ALL/Pre-B-ALL without t(9;22)
-	GSM330168	MILES stage 1 data N1_0538	Leukemia patient sample	bone marrow	c-ALL/Pre-B-ALL without t(9;22)
-	GSM330169	MILES stage 1 data N1_0539	Leukemia patient sample	bone marrow	c-ALL/Pre-B-ALL without t(9;22)
-	GSM330170	MILES stage 1 data N1_0540	Leukemia patient sample	bone marrow	c-ALL/Pre-B-ALL without t(9;22)
-	GSM330171	MILES stage 1 data N1_0541	Leukemia patient sample	bone marrow	c-ALL/Pre-B-ALL without t(9;22)
-	GSM330172	MILES stage 1 data N1_0542	Leukemia patient sample	bone marrow	c-ALL/Pre-B-ALL without t(9;22)
-	GSM330173	MILES stage 1 data N1_0543	Leukemia patient sample	bone marrow	c-ALL/Pre-B-ALL without t(9;22)
-	GSM330174	MILES stage 1 data N1_0544	Leukemia patient sample	bone marrow	c-ALL/Pre-B-ALL without t(9;22)
-	GSM330175	MILES stage 1 data N1_0545	Leukemia patient sample	bone marrow	c-ALL/Pre-B-ALL without t(9;22)
-	GSM330176	MILES stage 1 data N1_0546	Leukemia patient sample	bone marrow	c-ALL/Pre-B-ALL without t(9;22)
-	GSM330177	MILES stage 1 data N1_0547	Leukemia patient sample	bone marrow	c-ALL/Pre-B-ALL without t(9;22)
-	GSM330178	MILES stage 1 data N1_0548	Leukemia patient sample	bone marrow	c-ALL/Pre-B-ALL without t(9;22)
-	GSM330179	MILES stage 1 data N1_0549	Leukemia patient sample	bone marrow	c-ALL/Pre-B-ALL without t(9;22)
-	GSM330180	MILES stage 1 data N1_0550	Leukemia patient sample	bone marrow	c-ALL/Pre-B-ALL without t(9;22)
-	GSM330181	MILES stage 1 data N1_0551	Leukemia patient sample	bone marrow	c-ALL/Pre-B-ALL without t(9;22)
-	GSM330182	MILES stage 1 data N1_0552	Leukemia patient sample	peripheral blood	c-ALL/Pre-B-ALL without t(9;22)
-	GSM330183	MILES stage 1 data N1_0553	Leukemia patient sample	bone marrow	c-ALL/Pre-B-ALL without t(9;22)
-	GSM330184	MILES stage 1 data N1_0554	Leukemia patient sample	bone marrow	c-ALL/Pre-B-ALL without t(9;22)
-	GSM330185	MILES stage 1 data N1_0555	Leukemia patient sample	bone marrow	c-ALL/Pre-B-ALL without t(9;22)
-	GSM330186	MILES stage 1 data N1_0556	Leukemia patient sample	bone marrow	c-ALL/Pre-B-ALL without t(9;22)
-	GSM330187	MILES stage 1 data N1_0557	Leukemia patient sample	bone marrow	c-ALL/Pre-B-ALL without t(9;22)
-	GSM330188	MILES stage 1 data N1_0558	Leukemia patient sample	bone marrow	c-ALL/Pre-B-ALL without t(9;22)
-	GSM330189	MILES stage 1 data N1_0559	Leukemia patient sample	bone marrow	c-ALL/Pre-B-ALL without t(9;22)
-	GSM330190	MILES stage 1 data N1_0560	Leukemia patient sample	peripheral blood	c-ALL/Pre-B-ALL without t(9;22)
-	GSM330191	MILES stage 1 data N1_0561	Leukemia patient sample	bone marrow	c-ALL/Pre-B-ALL without t(9;22)
-	GSM330192	MILES stage 1 data N1_0562	Leukemia patient sample	bone marrow	c-ALL/Pre-B-ALL without t(9;22)
-	GSM330193	MILES stage 1 data N1_0563	Leukemia patient sample	bone marrow	c-ALL/Pre-B-ALL without t(9;22)
-	GSM330194	MILES stage 1 data N1_0564	Leukemia patient sample	bone marrow	c-ALL/Pre-B-ALL without t(9;22)
-	GSM330195	MILES stage 1 data N1_0565	Leukemia patient sample	bone marrow	c-ALL/Pre-B-ALL without t(9;22)
-	GSM330196	MILES stage 1 data N1_0566	Leukemia patient sample	bone marrow	c-ALL/Pre-B-ALL without t(9;22)
-	GSM330197	MILES stage 1 data N1_0567	Leukemia patient sample	bone marrow	c-ALL/Pre-B-ALL without t(9;22)
-	GSM330198	MILES stage 1 data N1_0568	Leukemia patient sample	bone marrow	c-ALL/Pre-B-ALL without t(9;22)
-	GSM330199	MILES stage 1 data N1_0569	Leukemia patient sample	bone marrow	c-ALL/Pre-B-ALL without t(9;22)
-	GSM330200	MILES stage 1 data N1_0570	Leukemia patient sample	bone marrow	c-ALL/Pre-B-ALL without t(9;22)
-	GSM330201	MILES stage 1 data N1_0571	Leukemia patient sample	bone marrow	c-ALL/Pre-B-ALL without t(9;22)
-	GSM330202	MILES stage 1 data N1_0572	Leukemia patient sample	bone marrow	c-ALL/Pre-B-ALL without t(9;22)
-	GSM330203	MILES stage 1 data N1_0573	Leukemia patient sample	bone marrow	c-ALL/Pre-B-ALL without t(9;22)
-	GSM330204	MILES stage 1 data N1_0574	Leukemia patient sample	bone marrow	c-ALL/Pre-B-ALL without t(9;22)
-	GSM330205	MILES stage 1 data N1_0575	Leukemia patient sample	bone marrow	c-ALL/Pre-B-ALL without t(9;22)
-	GSM330206	MILES stage 1 data N1_0576	Leukemia patient sample	bone marrow	c-ALL/Pre-B-ALL without t(9;22)
-	GSM330207	MILES stage 1 data N1_0577	Leukemia patient sample	bone marrow	c-ALL/Pre-B-ALL without t(9;22)
-	GSM330208	MILES stage 1 data N1_0578	Leukemia patient sample	bone marrow	c-ALL/Pre-B-ALL without t(9;22)
-	GSM330209	MILES stage 1 data N1_0579	Leukemia patient sample	bone marrow	c-ALL/Pre-B-ALL without t(9;22)
-	GSM330210	MILES stage 1 data N1_0580	Leukemia patient sample	bone marrow	c-ALL/Pre-B-ALL without t(9;22)
-	GSM330211	MILES stage 1 data N1_0581	Leukemia patient sample	bone marrow	c-ALL/Pre-B-ALL without t(9;22)
-	GSM330212	MILES stage 1 data N1_0582	Leukemia patient sample	bone marrow	c-ALL/Pre-B-ALL without t(9;22)
-	GSM330213	MILES stage 1 data N1_0583	Leukemia patient sample	bone marrow	c-ALL/Pre-B-ALL without t(9;22)
-	GSM330214	MILES stage 1 data N1_0584	Leukemia patient sample	bone marrow	c-ALL/Pre-B-ALL without t(9;22)
-	GSM330215	MILES stage 1 data N1_0585	Leukemia patient sample	bone marrow	c-ALL/Pre-B-ALL without t(9;22)
-	GSM330216	MILES stage 1 data N1_0586	Leukemia patient sample	bone marrow	c-ALL/Pre-B-ALL without t(9;22)
-	GSM330217	MILES stage 1 data N1_0587	Leukemia patient sample	bone marrow	c-ALL/Pre-B-ALL without t(9;22)
-	GSM330218	MILES stage 1 data N1_0588	Leukemia patient sample	bone marrow	c-ALL/Pre-B-ALL without t(9;22)
-	GSM330219	MILES stage 1 data N1_0589	Leukemia patient sample	bone marrow	c-ALL/Pre-B-ALL without t(9;22)
-	GSM330220	MILES stage 1 data N1_0590	Leukemia patient sample	bone marrow	c-ALL/Pre-B-ALL without t(9;22)
-	GSM330221	MILES stage 1 data N1_0591	Leukemia patient sample	bone marrow	c-ALL/Pre-B-ALL without t(9;22)
-	GSM330222	MILES stage 1 data N1_0592	Leukemia patient sample	bone marrow	c-ALL/Pre-B-ALL without t(9;22)
-	GSM330223	MILES stage 1 data N1_0593	Leukemia patient sample	bone marrow	c-ALL/Pre-B-ALL without t(9;22)
-	GSM330224	MILES stage 1 data N1_0594	Leukemia patient sample	bone marrow	c-ALL/Pre-B-ALL without t(9;22)
-	GSM330225	MILES stage 1 data N1_0595	Leukemia patient sample	bone marrow	c-ALL/Pre-B-ALL without t(9;22)
-	GSM330226	MILES stage 1 data N1_0596	Leukemia patient sample	bone marrow	c-ALL/Pre-B-ALL without t(9;22)
-	GSM330227	MILES stage 1 data N1_0597	Leukemia patient sample	bone marrow	c-ALL/Pre-B-ALL without t(9;22)
-	GSM330228	MILES stage 1 data N1_0598	Leukemia patient sample	bone marrow	c-ALL/Pre-B-ALL without t(9;22)
-	GSM330229	MILES stage 1 data N1_0599	Leukemia patient sample	bone marrow	c-ALL/Pre-B-ALL without t(9;22)
-	GSM330230	MILES stage 1 data N1_0600	Leukemia patient sample	bone marrow	c-ALL/Pre-B-ALL without t(9;22)
-	GSM330231	MILES stage 1 data N1_0601	Leukemia patient sample	bone marrow	c-ALL/Pre-B-ALL without t(9;22)
-	GSM330232	MILES stage 1 data N1_0602	Leukemia patient sample	bone marrow	c-ALL/Pre-B-ALL without t(9;22)
-	GSM330233	MILES stage 1 data N1_0603	Leukemia patient sample	bone marrow	c-ALL/Pre-B-ALL without t(9;22)
-	GSM330234	MILES stage 1 data N1_0604	Leukemia patient sample	bone marrow	c-ALL/Pre-B-ALL without t(9;22)
-	GSM330235	MILES stage 1 data N1_0605	Leukemia patient sample	bone marrow	c-ALL/Pre-B-ALL without t(9;22)
-	GSM330236	MILES stage 1 data N1_0606	Leukemia patient sample	bone marrow	c-ALL/Pre-B-ALL without t(9;22)
-	GSM330237	MILES stage 1 data N1_0607	Leukemia patient sample	bone marrow	c-ALL/Pre-B-ALL without t(9;22)
-	GSM330238	MILES stage 1 data N1_0608	Leukemia patient sample	bone marrow	c-ALL/Pre-B-ALL without t(9;22)
-	GSM330239	MILES stage 1 data N1_0609	Leukemia patient sample	bone marrow	c-ALL/Pre-B-ALL without t(9;22)
-	GSM330240	MILES stage 1 data N1_0610	Leukemia patient sample	bone marrow	c-ALL/Pre-B-ALL without t(9;22)
-	GSM330241	MILES stage 1 data N1_0611	Leukemia patient sample	bone marrow	c-ALL/Pre-B-ALL without t(9;22)
-	GSM330242	MILES stage 1 data N1_0612	Leukemia patient sample	bone marrow	c-ALL/Pre-B-ALL without t(9;22)
-	GSM330243	MILES stage 1 data N1_0613	Leukemia patient sample	bone marrow	c-ALL/Pre-B-ALL without t(9;22)
-	GSM330244	MILES stage 1 data N1_0614	Leukemia patient sample	bone marrow	c-ALL/Pre-B-ALL without t(9;22)
-	GSM330245	MILES stage 1 data N1_0615	Leukemia patient sample	bone marrow	c-ALL/Pre-B-ALL without t(9;22)
-	GSM330246	MILES stage 1 data N1_0616	Leukemia patient sample	bone marrow	c-ALL/Pre-B-ALL without t(9;22)
-	GSM330247	MILES stage 1 data N1_0617	Leukemia patient sample	bone marrow	c-ALL/Pre-B-ALL without t(9;22)
-	GSM330248	MILES stage 1 data N1_0618	Leukemia patient sample	bone marrow	c-ALL/Pre-B-ALL without t(9;22)
-	GSM330249	MILES stage 1 data N1_0619	Leukemia patient sample	bone marrow	c-ALL/Pre-B-ALL without t(9;22)
-	GSM330250	MILES stage 1 data N1_0620	Leukemia patient sample	bone marrow	c-ALL/Pre-B-ALL without t(9;22)
-	GSM330251	MILES stage 1 data N1_0621	Leukemia patient sample	bone marrow	c-ALL/Pre-B-ALL without t(9;22)
-	GSM330252	MILES stage 1 data N1_0622	Leukemia patient sample	bone marrow	c-ALL/Pre-B-ALL without t(9;22)
-	GSM330253	MILES stage 1 data N1_0623	Leukemia patient sample	bone marrow	c-ALL/Pre-B-ALL without t(9;22)
-	GSM330254	MILES stage 1 data N1_0624	Leukemia patient sample	bone marrow	c-ALL/Pre-B-ALL without t(9;22)
-	GSM330255	MILES stage 1 data N1_0625	Leukemia patient sample	bone marrow	c-ALL/Pre-B-ALL without t(9;22)
-	GSM330256	MILES stage 1 data N1_0626	Leukemia patient sample	bone marrow	c-ALL/Pre-B-ALL without t(9;22)
-	GSM330257	MILES stage 1 data N1_0627	Leukemia patient sample	bone marrow	c-ALL/Pre-B-ALL without t(9;22)
-	GSM330258	MILES stage 1 data N1_0628	Leukemia patient sample	bone marrow	c-ALL/Pre-B-ALL without t(9;22)
-	GSM330259	MILES stage 1 data N1_0629	Leukemia patient sample	bone marrow	c-ALL/Pre-B-ALL without t(9;22)
-	GSM330260	MILES stage 1 data N1_0630	Leukemia patient sample	bone marrow	c-ALL/Pre-B-ALL without t(9;22)
-	GSM330261	MILES stage 1 data N1_0631	Leukemia patient sample	bone marrow	c-ALL/Pre-B-ALL without t(9;22)
-	GSM330262	MILES stage 1 data N1_0632	Leukemia patient sample	bone marrow	c-ALL/Pre-B-ALL without t(9;22)
-	GSM330263	MILES stage 1 data N1_0633	Leukemia patient sample	bone marrow	c-ALL/Pre-B-ALL without t(9;22)
-	GSM330264	MILES stage 1 data N1_0634	Leukemia patient sample	bone marrow	c-ALL/Pre-B-ALL without t(9;22)
-	GSM330265	MILES stage 1 data N1_0635	Leukemia patient sample	bone marrow	c-ALL/Pre-B-ALL without t(9;22)
-	GSM330266	MILES stage 1 data N1_0636	Leukemia patient sample	bone marrow	c-ALL/Pre-B-ALL without t(9;22)
-	GSM330267	MILES stage 1 data N1_0637	Leukemia patient sample	bone marrow	c-ALL/Pre-B-ALL without t(9;22)
-	GSM330268	MILES stage 1 data N1_0638	Leukemia patient sample	bone marrow	c-ALL/Pre-B-ALL without t(9;22)
-	GSM330269	MILES stage 1 data N1_0639	Leukemia patient sample	bone marrow	c-ALL/Pre-B-ALL without t(9;22)
-	GSM330270	MILES stage 1 data N1_0640	Leukemia patient sample	bone marrow	c-ALL/Pre-B-ALL without t(9;22)
-	GSM330271	MILES stage 1 data N1_0641	Leukemia patient sample	bone marrow	c-ALL/Pre-B-ALL without t(9;22)
-	GSM330272	MILES stage 1 data N1_0642	Leukemia patient sample	bone marrow	c-ALL/Pre-B-ALL without t(9;22)
-	GSM330273	MILES stage 1 data N1_0643	Leukemia patient sample	bone marrow	c-ALL/Pre-B-ALL without t(9;22)
-	GSM330274	MILES stage 1 data N1_0644	Leukemia patient sample	bone marrow	c-ALL/Pre-B-ALL without t(9;22)
-	GSM330275	MILES stage 1 data N1_0645	Leukemia patient sample	bone marrow	c-ALL/Pre-B-ALL without t(9;22)
-	GSM330276	MILES stage 1 data N1_0646	Leukemia patient sample	bone marrow	c-ALL/Pre-B-ALL without t(9;22)
-	GSM330277	MILES stage 1 data N1_0647	Leukemia patient sample	peripheral blood	c-ALL/Pre-B-ALL without t(9;22)
-	GSM330278	MILES stage 1 data N1_0648	Leukemia patient sample	bone marrow	c-ALL/Pre-B-ALL without t(9;22)
-	GSM330279	MILES stage 1 data N1_0649	Leukemia patient sample	bone marrow	c-ALL/Pre-B-ALL without t(9;22)
-	GSM330280	MILES stage 1 data N1_0650	Leukemia patient sample	bone marrow	c-ALL/Pre-B-ALL without t(9;22)
-	GSM330281	MILES stage 1 data N1_0651	Leukemia patient sample	bone marrow	c-ALL/Pre-B-ALL without t(9;22)
-	GSM330282	MILES stage 1 data N1_0652	Leukemia patient sample	bone marrow	c-ALL/Pre-B-ALL without t(9;22)
-	GSM330283	MILES stage 1 data N1_0653	Leukemia patient sample	peripheral blood	c-ALL/Pre-B-ALL without t(9;22)
-	GSM330284	MILES stage 1 data N1_0654	Leukemia patient sample	bone marrow	c-ALL/Pre-B-ALL without t(9;22)
-	GSM330285	MILES stage 1 data N1_0655	Leukemia patient sample	bone marrow	c-ALL/Pre-B-ALL without t(9;22)
-	GSM330286	MILES stage 1 data N1_0656	Leukemia patient sample	bone marrow	c-ALL/Pre-B-ALL without t(9;22)
-	GSM330287	MILES stage 1 data N1_0657	Leukemia patient sample	bone marrow	c-ALL/Pre-B-ALL without t(9;22)
-	GSM330288	MILES stage 1 data N1_0658	Leukemia patient sample	bone marrow	c-ALL/Pre-B-ALL without t(9;22)
-	GSM330289	MILES stage 1 data N1_0659	Leukemia patient sample	bone marrow	c-ALL/Pre-B-ALL without t(9;22)
-	GSM330290	MILES stage 1 data N1_0660	Leukemia patient sample	bone marrow	c-ALL/Pre-B-ALL without t(9;22)
-	GSM330291	MILES stage 1 data N1_0661	Leukemia patient sample	bone marrow	c-ALL/Pre-B-ALL without t(9;22)
-	GSM330292	MILES stage 1 data N1_0662	Leukemia patient sample	bone marrow	c-ALL/Pre-B-ALL without t(9;22)
-	GSM330293	MILES stage 1 data N1_0663	Leukemia patient sample	bone marrow	c-ALL/Pre-B-ALL without t(9;22)
-	GSM330294	MILES stage 1 data N1_0664	Leukemia patient sample	bone marrow	c-ALL/Pre-B-ALL without t(9;22)
-	GSM330295	MILES stage 1 data N1_0665	Leukemia patient sample	bone marrow	c-ALL/Pre-B-ALL without t(9;22)
-	GSM330296	MILES stage 1 data N1_0666	Leukemia patient sample	bone marrow	c-ALL/Pre-B-ALL without t(9;22)
-	GSM330297	MILES stage 1 data N1_0667	Leukemia patient sample	bone marrow	c-ALL/Pre-B-ALL without t(9;22)
-	GSM330298	MILES stage 1 data N1_0668	Leukemia patient sample	bone marrow	c-ALL/Pre-B-ALL without t(9;22)
-	GSM330299	MILES stage 1 data N1_0669	Leukemia patient sample	bone marrow	c-ALL/Pre-B-ALL without t(9;22)
-	GSM330300	MILES stage 1 data N1_0670	Leukemia patient sample	bone marrow	c-ALL/Pre-B-ALL without t(9;22)
-	GSM330301	MILES stage 1 data N1_0671	Leukemia patient sample	bone marrow	c-ALL/Pre-B-ALL without t(9;22)
-	GSM330302	MILES stage 1 data N1_0672	Leukemia patient sample	bone marrow	c-ALL/Pre-B-ALL without t(9;22)
-	GSM330303	MILES stage 1 data N1_0673	Leukemia patient sample	bone marrow	c-ALL/Pre-B-ALL without t(9;22)
-	GSM330304	MILES stage 1 data N1_0674	Leukemia patient sample	bone marrow	c-ALL/Pre-B-ALL without t(9;22)
-	GSM330305	MILES stage 1 data N1_0675	Leukemia patient sample	bone marrow	c-ALL/Pre-B-ALL without t(9;22)
-	GSM330306	MILES stage 1 data N1_0676	Leukemia patient sample	bone marrow	c-ALL/Pre-B-ALL without t(9;22)
-	GSM330307	MILES stage 1 data N1_0677	Leukemia patient sample	bone marrow	c-ALL/Pre-B-ALL without t(9;22)
-	GSM330308	MILES stage 1 data N1_0678	Leukemia patient sample	bone marrow	c-ALL/Pre-B-ALL without t(9;22)
-	GSM330309	MILES stage 1 data N1_0679	Leukemia patient sample	bone marrow	c-ALL/Pre-B-ALL without t(9;22)
-	GSM330310	MILES stage 1 data N1_0680	Leukemia patient sample	bone marrow	c-ALL/Pre-B-ALL without t(9;22)
-	GSM330317	MILES stage 1 data N1_0681	Leukemia patient sample	bone marrow	c-ALL/Pre-B-ALL without t(9;22)
-	GSM330318	MILES stage 1 data N1_0682	Leukemia patient sample	bone marrow	c-ALL/Pre-B-ALL without t(9;22)
-	GSM330319	MILES stage 1 data N1_0683	Leukemia patient sample	bone marrow	c-ALL/Pre-B-ALL without t(9;22)
-	GSM330320	MILES stage 1 data N1_0684	Leukemia patient sample	bone marrow	c-ALL/Pre-B-ALL without t(9;22)
-	GSM330321	MILES stage 1 data N1_0685	Leukemia patient sample	bone marrow	c-ALL/Pre-B-ALL without t(9;22)
-	GSM330322	MILES stage 1 data N1_0686	Leukemia patient sample	bone marrow	c-ALL/Pre-B-ALL without t(9;22)
-	GSM330323	MILES stage 1 data N1_0687	Leukemia patient sample	bone marrow	c-ALL/Pre-B-ALL without t(9;22)
-	GSM330324	MILES stage 1 data N1_0688	Leukemia patient sample	bone marrow	c-ALL/Pre-B-ALL without t(9;22)
-	GSM330325	MILES stage 1 data N1_0689	Leukemia patient sample	bone marrow	c-ALL/Pre-B-ALL without t(9;22)
-	GSM330326	MILES stage 1 data N1_0690	Leukemia patient sample	bone marrow	c-ALL/Pre-B-ALL without t(9;22)
-	GSM330327	MILES stage 1 data N1_0691	Leukemia patient sample	bone marrow	c-ALL/Pre-B-ALL without t(9;22)
-	GSM330328	MILES stage 1 data N1_0692	Leukemia patient sample	bone marrow	c-ALL/Pre-B-ALL without t(9;22)
-	GSM330329	MILES stage 1 data N1_0693	Leukemia patient sample	bone marrow	c-ALL/Pre-B-ALL without t(9;22)
-	GSM330330	MILES stage 1 data N1_0694	Leukemia patient sample	bone marrow	c-ALL/Pre-B-ALL without t(9;22)
-	GSM330331	MILES stage 1 data N1_0695	Leukemia patient sample	bone marrow	c-ALL/Pre-B-ALL without t(9;22)
-	GSM330332	MILES stage 1 data N1_0696	Leukemia patient sample	bone marrow	c-ALL/Pre-B-ALL without t(9;22)
-	GSM330333	MILES stage 1 data N1_0697	Leukemia patient sample	bone marrow	c-ALL/Pre-B-ALL without t(9;22)
-	GSM330334	MILES stage 1 data N1_0698	Leukemia patient sample	bone marrow	c-ALL/Pre-B-ALL without t(9;22)
-	GSM330335	MILES stage 1 data N1_0699	Leukemia patient sample	bone marrow	c-ALL/Pre-B-ALL without t(9;22)
-	GSM330336	MILES stage 1 data N1_0700	Leukemia patient sample	bone marrow	c-ALL/Pre-B-ALL without t(9;22)
-	GSM330337	MILES stage 1 data N1_0701	Leukemia patient sample	bone marrow	c-ALL/Pre-B-ALL without t(9;22)
-	GSM330338	MILES stage 1 data N1_0702	Leukemia patient sample	bone marrow	c-ALL/Pre-B-ALL without t(9;22)
-	GSM330339	MILES stage 1 data N1_0703	Leukemia patient sample	bone marrow	c-ALL/Pre-B-ALL without t(9;22)
-	GSM330340	MILES stage 1 data N1_0704	Leukemia patient sample	bone marrow	c-ALL/Pre-B-ALL without t(9;22)
-	GSM330341	MILES stage 1 data N1_0705	Leukemia patient sample	bone marrow	c-ALL/Pre-B-ALL without t(9;22)
-	GSM330342	MILES stage 1 data N1_0706	Leukemia patient sample	bone marrow	c-ALL/Pre-B-ALL without t(9;22)
-	GSM330343	MILES stage 1 data N1_0707	Leukemia patient sample	bone marrow	c-ALL/Pre-B-ALL without t(9;22)
-	GSM330344	MILES stage 1 data N1_0708	Leukemia patient sample	bone marrow	c-ALL/Pre-B-ALL without t(9;22)
-	GSM330345	MILES stage 1 data N1_0709	Leukemia patient sample	bone marrow	c-ALL/Pre-B-ALL without t(9;22)
-	GSM330346	MILES stage 1 data N1_0710	Leukemia patient sample	bone marrow	c-ALL/Pre-B-ALL without t(9;22)
-	GSM330347	MILES stage 1 data N1_0711	Leukemia patient sample	bone marrow	c-ALL/Pre-B-ALL without t(9;22)
-	GSM330348	MILES stage 1 data N1_0712	Leukemia patient sample	bone marrow	c-ALL/Pre-B-ALL without t(9;22)
-	GSM330349	MILES stage 1 data N1_0713	Leukemia patient sample	bone marrow	c-ALL/Pre-B-ALL without t(9;22)
-	GSM330350	MILES stage 1 data N1_0714	Leukemia patient sample	bone marrow	c-ALL/Pre-B-ALL without t(9;22)
-	GSM330351	MILES stage 1 data N1_0715	Leukemia patient sample	bone marrow	c-ALL/Pre-B-ALL without t(9;22)
-	GSM330352	MILES stage 1 data N1_0716	Leukemia patient sample	bone marrow	c-ALL/Pre-B-ALL without t(9;22)
-	GSM330353	MILES stage 1 data N1_0717	Leukemia patient sample	bone marrow	c-ALL/Pre-B-ALL without t(9;22)
-	GSM330354	MILES stage 1 data N1_0718	Leukemia patient sample	bone marrow	c-ALL/Pre-B-ALL without t(9;22)
-	GSM330355	MILES stage 1 data N1_0719	Leukemia patient sample	bone marrow	c-ALL/Pre-B-ALL without t(9;22)
-	GSM330356	MILES stage 1 data N1_0720	Leukemia patient sample	bone marrow	c-ALL/Pre-B-ALL without t(9;22)
-	GSM330357	MILES stage 1 data N1_0721	Leukemia patient sample	bone marrow	c-ALL/Pre-B-ALL without t(9;22)
-	GSM330358	MILES stage 1 data N1_0722	Leukemia patient sample	bone marrow	c-ALL/Pre-B-ALL without t(9;22)
-	GSM330359	MILES stage 1 data N1_0723	Leukemia patient sample	bone marrow	c-ALL/Pre-B-ALL without t(9;22)
-	GSM330360	MILES stage 1 data N1_0724	Leukemia patient sample	bone marrow	c-ALL/Pre-B-ALL without t(9;22)
-	GSM330361	MILES stage 1 data N1_0725	Leukemia patient sample	bone marrow	c-ALL/Pre-B-ALL without t(9;22)
-	GSM330362	MILES stage 1 data N1_0726	Leukemia patient sample	bone marrow	c-ALL/Pre-B-ALL without t(9;22)
-	GSM330363	MILES stage 1 data N1_0727	Leukemia patient sample	bone marrow	c-ALL/Pre-B-ALL without t(9;22)
-	GSM330364	MILES stage 1 data N1_0728	Leukemia patient sample	bone marrow	c-ALL/Pre-B-ALL without t(9;22)
-	GSM330365	MILES stage 1 data N1_0729	Leukemia patient sample	bone marrow	c-ALL/Pre-B-ALL without t(9;22)
-	GSM330366	MILES stage 1 data N1_0730	Leukemia patient sample	bone marrow	c-ALL/Pre-B-ALL without t(9;22)
-	GSM330367	MILES stage 1 data N1_0731	Leukemia patient sample	bone marrow	c-ALL/Pre-B-ALL without t(9;22)
-	GSM330368	MILES stage 1 data N1_0732	Leukemia patient sample	bone marrow	c-ALL/Pre-B-ALL without t(9;22)
-	GSM330369	MILES stage 1 data N1_0733	Leukemia patient sample	bone marrow	c-ALL/Pre-B-ALL without t(9;22)
-	GSM330370	MILES stage 1 data N1_0734	Leukemia patient sample	bone marrow	c-ALL/Pre-B-ALL without t(9;22)
-	GSM330371	MILES stage 1 data N1_0735	Leukemia patient sample	bone marrow	c-ALL/Pre-B-ALL without t(9;22)
-	GSM330372	MILES stage 1 data N1_0736	Leukemia patient sample	bone marrow	c-ALL/Pre-B-ALL without t(9;22)
-	GSM330373	MILES stage 1 data N1_0737	Leukemia patient sample	bone marrow	c-ALL/Pre-B-ALL without t(9;22)
-	GSM330374	MILES stage 1 data N1_0738	Leukemia patient sample	bone marrow	c-ALL/Pre-B-ALL without t(9;22)
-	GSM330375	MILES stage 1 data N1_0739	Leukemia patient sample	bone marrow	c-ALL/Pre-B-ALL without t(9;22)
-	GSM330376	MILES stage 1 data N1_0740	Leukemia patient sample	bone marrow	c-ALL/Pre-B-ALL without t(9;22)
-	GSM330377	MILES stage 1 data N1_0741	Leukemia patient sample	bone marrow	c-ALL/Pre-B-ALL without t(9;22)
-	GSM330378	MILES stage 1 data N1_0742	Leukemia patient sample	bone marrow	c-ALL/Pre-B-ALL without t(9;22)
-	GSM330379	MILES stage 1 data N1_0743	Leukemia patient sample	bone marrow	c-ALL/Pre-B-ALL without t(9;22)
-	GSM330380	MILES stage 1 data N1_0744	Leukemia patient sample	bone marrow	c-ALL/Pre-B-ALL without t(9;22)
-	GSM330381	MILES stage 1 data N1_0745	Leukemia patient sample	bone marrow	c-ALL/Pre-B-ALL without t(9;22)
-	GSM330382	MILES stage 1 data N1_0746	Leukemia patient sample	bone marrow	c-ALL/Pre-B-ALL without t(9;22)
-	GSM330383	MILES stage 1 data N1_0747	Leukemia patient sample	bone marrow	c-ALL/Pre-B-ALL without t(9;22)
-	GSM330384	MILES stage 1 data N1_0748	Leukemia patient sample	bone marrow	c-ALL/Pre-B-ALL without t(9;22)
-	GSM330385	MILES stage 1 data N1_0749	Leukemia patient sample	bone marrow	c-ALL/Pre-B-ALL without t(9;22)
-	GSM330386	MILES stage 1 data N1_0750	Leukemia patient sample	bone marrow	c-ALL/Pre-B-ALL without t(9;22)
-	GSM330387	MILES stage 1 data N1_0751	Leukemia patient sample	bone marrow	AML with t(8;21)
-	GSM330388	MILES stage 1 data N1_0752	Leukemia patient sample	bone marrow	AML with t(8;21)
-	GSM330389	MILES stage 1 data N1_0753	Leukemia patient sample	bone marrow	AML with t(8;21)
-	GSM330390	MILES stage 1 data N1_0754	Leukemia patient sample	bone marrow	AML with t(8;21)
-	GSM330391	MILES stage 1 data N1_0755	Leukemia patient sample	bone marrow	AML with t(8;21)
-	GSM330392	MILES stage 1 data N1_0756	Leukemia patient sample	bone marrow	AML with t(8;21)
-	GSM330393	MILES stage 1 data N1_0757	Leukemia patient sample	peripheral blood	AML with t(8;21)
-	GSM330394	MILES stage 1 data N1_0758	Leukemia patient sample	bone marrow	AML with t(8;21)
-	GSM330395	MILES stage 1 data N1_0759	Leukemia patient sample	bone marrow	AML with t(8;21)
-	GSM330396	MILES stage 1 data N1_0760	Leukemia patient sample	bone marrow	AML with t(8;21)
-	GSM330397	MILES stage 1 data N1_0761	Leukemia patient sample	bone marrow	AML with t(8;21)
-	GSM330398	MILES stage 1 data N1_0762	Leukemia patient sample	bone marrow	AML with t(8;21)
-	GSM330399	MILES stage 1 data N1_0763	Leukemia patient sample	bone marrow	AML with t(8;21)
-	GSM330400	MILES stage 1 data N1_0764	Leukemia patient sample	bone marrow	AML with t(8;21)
-	GSM330401	MILES stage 1 data N1_0765	Leukemia patient sample	bone marrow	AML with t(8;21)
-	GSM330402	MILES stage 1 data N1_0766	Leukemia patient sample	bone marrow	AML with t(8;21)
-	GSM330403	MILES stage 1 data N1_0767	Leukemia patient sample	bone marrow	AML with t(8;21)
-	GSM330404	MILES stage 1 data N1_0768	Leukemia patient sample	bone marrow	AML with t(8;21)
-	GSM330405	MILES stage 1 data N1_0769	Leukemia patient sample	bone marrow	AML with t(8;21)
-	GSM330406	MILES stage 1 data N1_0770	Leukemia patient sample	bone marrow	AML with t(8;21)
-	GSM330407	MILES stage 1 data N1_0771	Leukemia patient sample	peripheral blood	AML with t(8;21)
-	GSM330408	MILES stage 1 data N1_0772	Leukemia patient sample	bone marrow	AML with t(8;21)
-	GSM330409	MILES stage 1 data N1_0773	Leukemia patient sample	bone marrow	AML with t(8;21)
-	GSM330410	MILES stage 1 data N1_0774	Leukemia patient sample	bone marrow	AML with t(8;21)
-	GSM330411	MILES stage 1 data N1_0775	Leukemia patient sample	bone marrow	AML with t(8;21)
-	GSM330412	MILES stage 1 data N1_0776	Leukemia patient sample	bone marrow	AML with t(8;21)
-	GSM330413	MILES stage 1 data N1_0777	Leukemia patient sample	bone marrow	AML with t(8;21)
-	GSM330414	MILES stage 1 data N1_0778	Leukemia patient sample	bone marrow	AML with t(8;21)
-	GSM330415	MILES stage 1 data N1_0779	Leukemia patient sample	bone marrow	AML with t(8;21)
-	GSM330416	MILES stage 1 data N1_0780	Leukemia patient sample	bone marrow	AML with t(8;21)
-	GSM330417	MILES stage 1 data N1_0781	Leukemia patient sample	peripheral blood	AML with t(8;21)
-	GSM330418	MILES stage 1 data N1_0782	Leukemia patient sample	peripheral blood	AML with t(8;21)
-	GSM330419	MILES stage 1 data N1_0783	Leukemia patient sample	peripheral blood	AML with t(8;21)
-	GSM330420	MILES stage 1 data N1_0784	Leukemia patient sample	bone marrow	AML with t(8;21)
-	GSM330421	MILES stage 1 data N1_0785	Leukemia patient sample	bone marrow	AML with t(8;21)
-	GSM330422	MILES stage 1 data N1_0786	Leukemia patient sample	bone marrow	AML with t(8;21)
-	GSM330423	MILES stage 1 data N1_0787	Leukemia patient sample	bone marrow	AML with t(8;21)
-	GSM330424	MILES stage 1 data N1_0788	Leukemia patient sample	bone marrow	AML with t(8;21)
-	GSM330425	MILES stage 1 data N1_0789	Leukemia patient sample	bone marrow	AML with t(8;21)
-	GSM330426	MILES stage 1 data N1_0790	Leukemia patient sample	bone marrow	AML with t(8;21)
-	GSM330427	MILES stage 1 data N1_0791	Leukemia patient sample	bone marrow	AML with t(15;17)
-	GSM330428	MILES stage 1 data N1_0792	Leukemia patient sample	bone marrow	AML with t(15;17)
-	GSM330429	MILES stage 1 data N1_0793	Leukemia patient sample	bone marrow	AML with t(15;17)
-	GSM330430	MILES stage 1 data N1_0794	Leukemia patient sample	bone marrow	AML with t(15;17)
-	GSM330431	MILES stage 1 data N1_0795	Leukemia patient sample	bone marrow	AML with t(15;17)
-	GSM330432	MILES stage 1 data N1_0796	Leukemia patient sample	bone marrow	AML with t(15;17)
-	GSM330433	MILES stage 1 data N1_0797	Leukemia patient sample	bone marrow	AML with t(15;17)
-	GSM330434	MILES stage 1 data N1_0798	Leukemia patient sample	bone marrow	AML with t(15;17)
-	GSM330435	MILES stage 1 data N1_0799	Leukemia patient sample	bone marrow	AML with t(15;17)
-	GSM330436	MILES stage 1 data N1_0800	Leukemia patient sample	bone marrow	AML with t(15;17)
-	GSM330437	MILES stage 1 data N1_0801	Leukemia patient sample	bone marrow	AML with t(15;17)
-	GSM330438	MILES stage 1 data N1_0802	Leukemia patient sample	bone marrow	AML with t(15;17)
-	GSM330439	MILES stage 1 data N1_0803	Leukemia patient sample	bone marrow	AML with t(15;17)
-	GSM330440	MILES stage 1 data N1_0804	Leukemia patient sample	bone marrow	AML with t(15;17)
-	GSM330441	MILES stage 1 data N1_0805	Leukemia patient sample	bone marrow	AML with t(15;17)
-	GSM330442	MILES stage 1 data N1_0806	Leukemia patient sample	bone marrow	AML with t(15;17)
-	GSM330443	MILES stage 1 data N1_0807	Leukemia patient sample	bone marrow	AML with t(15;17)
-	GSM330444	MILES stage 1 data N1_0808	Leukemia patient sample	bone marrow	AML with t(15;17)
-	GSM330445	MILES stage 1 data N1_0809	Leukemia patient sample	bone marrow	AML with t(15;17)
-	GSM330446	MILES stage 1 data N1_0810	Leukemia patient sample	peripheral blood	AML with t(15;17)
-	GSM330447	MILES stage 1 data N1_0811	Leukemia patient sample	bone marrow	AML with t(15;17)
-	GSM330448	MILES stage 1 data N1_0812	Leukemia patient sample	bone marrow	AML with t(15;17)
-	GSM330449	MILES stage 1 data N1_0813	Leukemia patient sample	bone marrow	AML with t(15;17)
-	GSM330450	MILES stage 1 data N1_0814	Leukemia patient sample	bone marrow	AML with t(15;17)
-	GSM330451	MILES stage 1 data N1_0815	Leukemia patient sample	bone marrow	AML with t(15;17)
-	GSM330452	MILES stage 1 data N1_0816	Leukemia patient sample	bone marrow	AML with t(15;17)
-	GSM330453	MILES stage 1 data N1_0817	Leukemia patient sample	peripheral blood	AML with t(15;17)
-	GSM330454	MILES stage 1 data N1_0818	Leukemia patient sample	peripheral blood	AML with t(15;17)
-	GSM330455	MILES stage 1 data N1_0819	Leukemia patient sample	bone marrow	AML with t(15;17)
-	GSM330456	MILES stage 1 data N1_0820	Leukemia patient sample	bone marrow	AML with t(15;17)
-	GSM330457	MILES stage 1 data N1_0821	Leukemia patient sample	bone marrow	AML with t(15;17)
-	GSM330458	MILES stage 1 data N1_0822	Leukemia patient sample	bone marrow	AML with t(15;17)
-	GSM330459	MILES stage 1 data N1_0823	Leukemia patient sample	bone marrow	AML with t(15;17)
-	GSM330460	MILES stage 1 data N1_0824	Leukemia patient sample	bone marrow	AML with t(15;17)
-	GSM330461	MILES stage 1 data N1_0825	Leukemia patient sample	bone marrow	AML with t(15;17)
-	GSM330462	MILES stage 1 data N1_0826	Leukemia patient sample	bone marrow	AML with t(15;17)
-	GSM330463	MILES stage 1 data N1_0827	Leukemia patient sample	bone marrow	AML with t(15;17)
-	GSM330464	MILES stage 1 data N1_0828	Leukemia patient sample	bone marrow	AML with inv(16)/t(16;16)
-	GSM330465	MILES stage 1 data N1_0829	Leukemia patient sample	bone marrow	AML with inv(16)/t(16;16)
-	GSM330466	MILES stage 1 data N1_0830	Leukemia patient sample	bone marrow	AML with inv(16)/t(16;16)
-	GSM330467	MILES stage 1 data N1_0831	Leukemia patient sample	bone marrow	AML with inv(16)/t(16;16)
-	GSM330468	MILES stage 1 data N1_0832	Leukemia patient sample	bone marrow	AML with inv(16)/t(16;16)
-	GSM330469	MILES stage 1 data N1_0833	Leukemia patient sample	bone marrow	AML with inv(16)/t(16;16)
-	GSM330470	MILES stage 1 data N1_0834	Leukemia patient sample	bone marrow	AML with inv(16)/t(16;16)
-	GSM330471	MILES stage 1 data N1_0835	Leukemia patient sample	bone marrow	AML with inv(16)/t(16;16)
-	GSM330472	MILES stage 1 data N1_0836	Leukemia patient sample	bone marrow	AML with inv(16)/t(16;16)
-	GSM330473	MILES stage 1 data N1_0837	Leukemia patient sample	bone marrow	AML with inv(16)/t(16;16)
-	GSM330474	MILES stage 1 data N1_0838	Leukemia patient sample	bone marrow	AML with inv(16)/t(16;16)
-	GSM330475	MILES stage 1 data N1_0839	Leukemia patient sample	bone marrow	AML with inv(16)/t(16;16)
-	GSM330476	MILES stage 1 data N1_0840	Leukemia patient sample	bone marrow	AML with inv(16)/t(16;16)
-	GSM330477	MILES stage 1 data N1_0841	Leukemia patient sample	bone marrow	AML with inv(16)/t(16;16)
-	GSM330478	MILES stage 1 data N1_0842	Leukemia patient sample	bone marrow	AML with inv(16)/t(16;16)
-	GSM330479	MILES stage 1 data N1_0843	Leukemia patient sample	bone marrow	AML with inv(16)/t(16;16)
-	GSM330480	MILES stage 1 data N1_0844	Leukemia patient sample	bone marrow	AML with inv(16)/t(16;16)
-	GSM330481	MILES stage 1 data N1_0845	Leukemia patient sample	bone marrow	AML with inv(16)/t(16;16)
-	GSM330482	MILES stage 1 data N1_0846	Leukemia patient sample	bone marrow	AML with inv(16)/t(16;16)
-	GSM330483	MILES stage 1 data N1_0847	Leukemia patient sample	bone marrow	AML with inv(16)/t(16;16)
-	GSM330484	MILES stage 1 data N1_0848	Leukemia patient sample	bone marrow	AML with inv(16)/t(16;16)
-	GSM330485	MILES stage 1 data N1_0849	Leukemia patient sample	bone marrow	AML with inv(16)/t(16;16)
-	GSM330486	MILES stage 1 data N1_0850	Leukemia patient sample	bone marrow	AML with inv(16)/t(16;16)
-	GSM330487	MILES stage 1 data N1_0851	Leukemia patient sample	bone marrow	AML with inv(16)/t(16;16)
-	GSM330488	MILES stage 1 data N1_0852	Leukemia patient sample	bone marrow	AML with inv(16)/t(16;16)
-	GSM330489	MILES stage 1 data N1_0853	Leukemia patient sample	peripheral blood	AML with inv(16)/t(16;16)
-	GSM330490	MILES stage 1 data N1_0854	Leukemia patient sample	bone marrow	AML with inv(16)/t(16;16)
-	GSM330491	MILES stage 1 data N1_0855	Leukemia patient sample	bone marrow	AML with inv(16)/t(16;16)
-	GSM330492	MILES stage 1 data N1_0856	Leukemia patient sample	bone marrow	AML with t(11q23)/MLL
-	GSM330493	MILES stage 1 data N1_0857	Leukemia patient sample	bone marrow	AML with t(11q23)/MLL
-	GSM330494	MILES stage 1 data N1_0858	Leukemia patient sample	bone marrow	AML with t(11q23)/MLL
-	GSM330495	MILES stage 1 data N1_0859	Leukemia patient sample	bone marrow	AML with t(11q23)/MLL
-	GSM330496	MILES stage 1 data N1_0860	Leukemia patient sample	bone marrow	AML with t(11q23)/MLL
-	GSM330497	MILES stage 1 data N1_0861	Leukemia patient sample	bone marrow	AML with t(11q23)/MLL
-	GSM330498	MILES stage 1 data N1_0862	Leukemia patient sample	bone marrow	AML with t(11q23)/MLL
-	GSM330499	MILES stage 1 data N1_0863	Leukemia patient sample	bone marrow	AML with t(11q23)/MLL
-	GSM330500	MILES stage 1 data N1_0864	Leukemia patient sample	bone marrow	AML with t(11q23)/MLL
-	GSM330501	MILES stage 1 data N1_0865	Leukemia patient sample	peripheral blood	AML with t(11q23)/MLL
-	GSM330502	MILES stage 1 data N1_0866	Leukemia patient sample	bone marrow	AML with t(11q23)/MLL
-	GSM330503	MILES stage 1 data N1_0867	Leukemia patient sample	bone marrow	AML with t(11q23)/MLL
-	GSM330504	MILES stage 1 data N1_0868	Leukemia patient sample	bone marrow	AML with t(11q23)/MLL
-	GSM330505	MILES stage 1 data N1_0869	Leukemia patient sample	bone marrow	AML with t(11q23)/MLL
-	GSM330506	MILES stage 1 data N1_0870	Leukemia patient sample	bone marrow	AML with t(11q23)/MLL
-	GSM330507	MILES stage 1 data N1_0871	Leukemia patient sample	peripheral blood	AML with t(11q23)/MLL
-	GSM330508	MILES stage 1 data N1_0872	Leukemia patient sample	bone marrow	AML with t(11q23)/MLL
-	GSM330509	MILES stage 1 data N1_0873	Leukemia patient sample	peripheral blood	AML with t(11q23)/MLL
-	GSM330510	MILES stage 1 data N1_0874	Leukemia patient sample	peripheral blood	AML with t(11q23)/MLL
-	GSM330511	MILES stage 1 data N1_0875	Leukemia patient sample	peripheral blood	AML with t(11q23)/MLL
-	GSM330512	MILES stage 1 data N1_0876	Leukemia patient sample	bone marrow	AML with t(11q23)/MLL
-	GSM330513	MILES stage 1 data N1_0877	Leukemia patient sample	bone marrow	AML with t(11q23)/MLL
-	GSM330514	MILES stage 1 data N1_0878	Leukemia patient sample	bone marrow	AML with t(11q23)/MLL
-	GSM330515	MILES stage 1 data N1_0879	Leukemia patient sample	bone marrow	AML with t(11q23)/MLL
-	GSM330516	MILES stage 1 data N1_0880	Leukemia patient sample	peripheral blood	AML with t(11q23)/MLL
-	GSM330517	MILES stage 1 data N1_0881	Leukemia patient sample	bone marrow	AML with t(11q23)/MLL
-	GSM330518	MILES stage 1 data N1_0882	Leukemia patient sample	bone marrow	AML with t(11q23)/MLL
-	GSM330519	MILES stage 1 data N1_0883	Leukemia patient sample	bone marrow	AML with t(11q23)/MLL
-	GSM330520	MILES stage 1 data N1_0884	Leukemia patient sample	bone marrow	AML with t(11q23)/MLL
-	GSM330521	MILES stage 1 data N1_0885	Leukemia patient sample	peripheral blood	AML with t(11q23)/MLL
-	GSM330522	MILES stage 1 data N1_0886	Leukemia patient sample	bone marrow	AML with t(11q23)/MLL
-	GSM330523	MILES stage 1 data N1_0887	Leukemia patient sample	bone marrow	AML with t(11q23)/MLL
-	GSM330524	MILES stage 1 data N1_0888	Leukemia patient sample	bone marrow	AML with t(11q23)/MLL
-	GSM330525	MILES stage 1 data N1_0889	Leukemia patient sample	peripheral blood	AML with t(11q23)/MLL
-	GSM330526	MILES stage 1 data N1_0890	Leukemia patient sample	bone marrow	AML with t(11q23)/MLL
-	GSM330527	MILES stage 1 data N1_0891	Leukemia patient sample	bone marrow	AML with t(11q23)/MLL
-	GSM330528	MILES stage 1 data N1_0892	Leukemia patient sample	peripheral blood	AML with t(11q23)/MLL
-	GSM330529	MILES stage 1 data N1_0893	Leukemia patient sample	bone marrow	AML with t(11q23)/MLL
-	GSM330530	MILES stage 1 data N1_0894	Leukemia patient sample	bone marrow	AML with normal karyotype + other abnormalities
-	GSM330531	MILES stage 1 data N1_0895	Leukemia patient sample	bone marrow	AML with normal karyotype + other abnormalities
-	GSM330532	MILES stage 1 data N1_0896	Leukemia patient sample	bone marrow	AML with normal karyotype + other abnormalities
-	GSM330533	MILES stage 1 data N1_0897	Leukemia patient sample	bone marrow	AML with normal karyotype + other abnormalities
-	GSM330534	MILES stage 1 data N1_0898	Leukemia patient sample	bone marrow	AML with normal karyotype + other abnormalities
-	GSM330535	MILES stage 1 data N1_0899	Leukemia patient sample	bone marrow	AML with normal karyotype + other abnormalities
-	GSM330536	MILES stage 1 data N1_0900	Leukemia patient sample	bone marrow	AML with normal karyotype + other abnormalities
-	GSM330537	MILES stage 1 data N1_0901	Leukemia patient sample	bone marrow	AML with normal karyotype + other abnormalities
-	GSM330538	MILES stage 1 data N1_0902	Leukemia patient sample	bone marrow	AML with normal karyotype + other abnormalities
-	GSM330539	MILES stage 1 data N1_0903	Leukemia patient sample	bone marrow	AML with normal karyotype + other abnormalities
-	GSM330540	MILES stage 1 data N1_0904	Leukemia patient sample	bone marrow	AML with normal karyotype + other abnormalities
-	GSM330541	MILES stage 1 data N1_0905	Leukemia patient sample	bone marrow	AML with normal karyotype + other abnormalities
-	GSM330542	MILES stage 1 data N1_0906	Leukemia patient sample	bone marrow	AML with normal karyotype + other abnormalities
-	GSM330543	MILES stage 1 data N1_0907	Leukemia patient sample	bone marrow	AML with normal karyotype + other abnormalities
-	GSM330544	MILES stage 1 data N1_0908	Leukemia patient sample	bone marrow	AML with normal karyotype + other abnormalities
-	GSM330545	MILES stage 1 data N1_0909	Leukemia patient sample	bone marrow	AML with normal karyotype + other abnormalities
-	GSM330546	MILES stage 1 data N1_0910	Leukemia patient sample	bone marrow	AML with normal karyotype + other abnormalities
-	GSM330547	MILES stage 1 data N1_0911	Leukemia patient sample	bone marrow	AML with normal karyotype + other abnormalities
-	GSM330548	MILES stage 1 data N1_0912	Leukemia patient sample	bone marrow	AML with normal karyotype + other abnormalities
-	GSM330549	MILES stage 1 data N1_0913	Leukemia patient sample	bone marrow	AML with normal karyotype + other abnormalities
-	GSM330550	MILES stage 1 data N1_0914	Leukemia patient sample	bone marrow	AML with normal karyotype + other abnormalities
-	GSM330551	MILES stage 1 data N1_0915	Leukemia patient sample	bone marrow	AML with normal karyotype + other abnormalities
-	GSM330552	MILES stage 1 data N1_0916	Leukemia patient sample	bone marrow	AML with normal karyotype + other abnormalities
-	GSM330553	MILES stage 1 data N1_0917	Leukemia patient sample	bone marrow	AML with normal karyotype + other abnormalities
-	GSM330554	MILES stage 1 data N1_0918	Leukemia patient sample	bone marrow	AML with normal karyotype + other abnormalities
-	GSM330555	MILES stage 1 data N1_0919	Leukemia patient sample	bone marrow	AML with normal karyotype + other abnormalities
-	GSM330556	MILES stage 1 data N1_0920	Leukemia patient sample	bone marrow	AML with normal karyotype + other abnormalities
-	GSM330557	MILES stage 1 data N1_0921	Leukemia patient sample	bone marrow	AML with normal karyotype + other abnormalities
-	GSM330558	MILES stage 1 data N1_0922	Leukemia patient sample	bone marrow	AML with normal karyotype + other abnormalities
-	GSM330559	MILES stage 1 data N1_0923	Leukemia patient sample	bone marrow	AML with normal karyotype + other abnormalities
-	GSM330560	MILES stage 1 data N1_0924	Leukemia patient sample	bone marrow	AML with normal karyotype + other abnormalities
-	GSM330561	MILES stage 1 data N1_0925	Leukemia patient sample	bone marrow	AML with normal karyotype + other abnormalities
-	GSM330562	MILES stage 1 data N1_0926	Leukemia patient sample	bone marrow	AML with normal karyotype + other abnormalities
-	GSM330563	MILES stage 1 data N1_0927	Leukemia patient sample	bone marrow	AML with normal karyotype + other abnormalities
-	GSM330564	MILES stage 1 data N1_0928	Leukemia patient sample	bone marrow	AML with normal karyotype + other abnormalities
-	GSM330565	MILES stage 1 data N1_0929	Leukemia patient sample	bone marrow	AML with normal karyotype + other abnormalities
-	GSM330566	MILES stage 1 data N1_0930	Leukemia patient sample	peripheral blood	AML with normal karyotype + other abnormalities
-	GSM330567	MILES stage 1 data N1_0931	Leukemia patient sample	bone marrow	AML with normal karyotype + other abnormalities
-	GSM330568	MILES stage 1 data N1_0932	Leukemia patient sample	bone marrow	AML with normal karyotype + other abnormalities
-	GSM330569	MILES stage 1 data N1_0933	Leukemia patient sample	bone marrow	AML with normal karyotype + other abnormalities
-	GSM330570	MILES stage 1 data N1_0934	Leukemia patient sample	bone marrow	AML with normal karyotype + other abnormalities
-	GSM330571	MILES stage 1 data N1_0935	Leukemia patient sample	bone marrow	AML with normal karyotype + other abnormalities
-	GSM330572	MILES stage 1 data N1_0936	Leukemia patient sample	bone marrow	AML with normal karyotype + other abnormalities
-	GSM330573	MILES stage 1 data N1_0937	Leukemia patient sample	bone marrow	AML with normal karyotype + other abnormalities
-	GSM330574	MILES stage 1 data N1_0938	Leukemia patient sample	bone marrow	AML with normal karyotype + other abnormalities
-	GSM330575	MILES stage 1 data N1_0939	Leukemia patient sample	bone marrow	AML with normal karyotype + other abnormalities
-	GSM330576	MILES stage 1 data N1_0940	Leukemia patient sample	bone marrow	AML with normal karyotype + other abnormalities
-	GSM330577	MILES stage 1 data N1_0941	Leukemia patient sample	bone marrow	AML with normal karyotype + other abnormalities
-	GSM330578	MILES stage 1 data N1_0942	Leukemia patient sample	bone marrow	AML with normal karyotype + other abnormalities
-	GSM330579	MILES stage 1 data N1_0943	Leukemia patient sample	bone marrow	AML with normal karyotype + other abnormalities
-	GSM330580	MILES stage 1 data N1_0944	Leukemia patient sample	bone marrow	AML with normal karyotype + other abnormalities
-	GSM330581	MILES stage 1 data N1_0945	Leukemia patient sample	bone marrow	AML with normal karyotype + other abnormalities
-	GSM330582	MILES stage 1 data N1_0946	Leukemia patient sample	bone marrow	AML with normal karyotype + other abnormalities
-	GSM330583	MILES stage 1 data N1_0947	Leukemia patient sample	bone marrow	AML with normal karyotype + other abnormalities
-	GSM330584	MILES stage 1 data N1_0948	Leukemia patient sample	bone marrow	AML with normal karyotype + other abnormalities
-	GSM330585	MILES stage 1 data N1_0949	Leukemia patient sample	bone marrow	AML with normal karyotype + other abnormalities
-	GSM330586	MILES stage 1 data N1_0950	Leukemia patient sample	peripheral blood	AML with normal karyotype + other abnormalities
-	GSM330587	MILES stage 1 data N1_0951	Leukemia patient sample	bone marrow	AML with normal karyotype + other abnormalities
-	GSM330588	MILES stage 1 data N1_0952	Leukemia patient sample	bone marrow	AML with normal karyotype + other abnormalities
-	GSM330589	MILES stage 1 data N1_0953	Leukemia patient sample	bone marrow	AML with normal karyotype + other abnormalities
-	GSM330590	MILES stage 1 data N1_0954	Leukemia patient sample	bone marrow	AML with normal karyotype + other abnormalities
-	GSM330591	MILES stage 1 data N1_0955	Leukemia patient sample	bone marrow	AML with normal karyotype + other abnormalities
-	GSM330592	MILES stage 1 data N1_0956	Leukemia patient sample	bone marrow	AML with normal karyotype + other abnormalities
-	GSM330593	MILES stage 1 data N1_0957	Leukemia patient sample	bone marrow	AML with normal karyotype + other abnormalities
-	GSM330594	MILES stage 1 data N1_0958	Leukemia patient sample	bone marrow	AML with normal karyotype + other abnormalities
-	GSM330595	MILES stage 1 data N1_0959	Leukemia patient sample	peripheral blood	AML with normal karyotype + other abnormalities
-	GSM330596	MILES stage 1 data N1_0960	Leukemia patient sample	bone marrow	AML with normal karyotype + other abnormalities
-	GSM330597	MILES stage 1 data N1_0961	Leukemia patient sample	bone marrow	AML with normal karyotype + other abnormalities
-	GSM330598	MILES stage 1 data N1_0962	Leukemia patient sample	bone marrow	AML with normal karyotype + other abnormalities
-	GSM330599	MILES stage 1 data N1_0963	Leukemia patient sample	bone marrow	AML with normal karyotype + other abnormalities
-	GSM330600	MILES stage 1 data N1_0964	Leukemia patient sample	bone marrow	AML with normal karyotype + other abnormalities
-	GSM330601	MILES stage 1 data N1_0965	Leukemia patient sample	bone marrow	AML with normal karyotype + other abnormalities
-	GSM330602	MILES stage 1 data N1_0966	Leukemia patient sample	bone marrow	AML with normal karyotype + other abnormalities
-	GSM330603	MILES stage 1 data N1_0967	Leukemia patient sample	bone marrow	AML with normal karyotype + other abnormalities
-	GSM330604	MILES stage 1 data N1_0968	Leukemia patient sample	peripheral blood	AML with normal karyotype + other abnormalities
-	GSM330605	MILES stage 1 data N1_0969	Leukemia patient sample	bone marrow	AML with normal karyotype + other abnormalities
-	GSM330606	MILES stage 1 data N1_0970	Leukemia patient sample	bone marrow	AML with normal karyotype + other abnormalities
-	GSM330607	MILES stage 1 data N1_0971	Leukemia patient sample	bone marrow	AML with normal karyotype + other abnormalities
-	GSM330608	MILES stage 1 data N1_0972	Leukemia patient sample	bone marrow	AML with normal karyotype + other abnormalities
-	GSM330609	MILES stage 1 data N1_0973	Leukemia patient sample	bone marrow	AML with normal karyotype + other abnormalities
-	GSM330610	MILES stage 1 data N1_0974	Leukemia patient sample	bone marrow	AML with normal karyotype + other abnormalities
-	GSM330611	MILES stage 1 data N1_0975	Leukemia patient sample	bone marrow	AML with normal karyotype + other abnormalities
-	GSM330612	MILES stage 1 data N1_0976	Leukemia patient sample	bone marrow	AML with normal karyotype + other abnormalities
-	GSM330613	MILES stage 1 data N1_0977	Leukemia patient sample	bone marrow	AML with normal karyotype + other abnormalities
-	GSM330614	MILES stage 1 data N1_0978	Leukemia patient sample	bone marrow	AML with normal karyotype + other abnormalities
-	GSM330615	MILES stage 1 data N1_0979	Leukemia patient sample	bone marrow	AML with normal karyotype + other abnormalities
-	GSM330616	MILES stage 1 data N1_0980	Leukemia patient sample	bone marrow	AML with normal karyotype + other abnormalities
-	GSM330617	MILES stage 1 data N1_0981	Leukemia patient sample	bone marrow	AML with normal karyotype + other abnormalities
-	GSM330618	MILES stage 1 data N1_0982	Leukemia patient sample	bone marrow	AML with normal karyotype + other abnormalities
-	GSM330619	MILES stage 1 data N1_0983	Leukemia patient sample	bone marrow	AML with normal karyotype + other abnormalities
-	GSM330620	MILES stage 1 data N1_0984	Leukemia patient sample	bone marrow	AML with normal karyotype + other abnormalities
-	GSM330621	MILES stage 1 data N1_0985	Leukemia patient sample	bone marrow	AML with normal karyotype + other abnormalities
-	GSM330622	MILES stage 1 data N1_0986	Leukemia patient sample	bone marrow	AML with normal karyotype + other abnormalities
-	GSM330623	MILES stage 1 data N1_0987	Leukemia patient sample	bone marrow	AML with normal karyotype + other abnormalities
-	GSM330624	MILES stage 1 data N1_0988	Leukemia patient sample	bone marrow	AML with normal karyotype + other abnormalities
-	GSM330625	MILES stage 1 data N1_0989	Leukemia patient sample	bone marrow	AML with normal karyotype + other abnormalities
-	GSM330626	MILES stage 1 data N1_0990	Leukemia patient sample	bone marrow	AML with normal karyotype + other abnormalities
-	GSM330627	MILES stage 1 data N1_0991	Leukemia patient sample	bone marrow	AML with normal karyotype + other abnormalities
-	GSM330628	MILES stage 1 data N1_0992	Leukemia patient sample	bone marrow	AML with normal karyotype + other abnormalities
-	GSM330629	MILES stage 1 data N1_0993	Leukemia patient sample	bone marrow	AML with normal karyotype + other abnormalities
-	GSM330630	MILES stage 1 data N1_0994	Leukemia patient sample	bone marrow	AML with normal karyotype + other abnormalities
-	GSM330631	MILES stage 1 data N1_0995	Leukemia patient sample	bone marrow	AML with normal karyotype + other abnormalities
-	GSM330632	MILES stage 1 data N1_0996	Leukemia patient sample	bone marrow	AML with normal karyotype + other abnormalities
-	GSM330633	MILES stage 1 data N1_0997	Leukemia patient sample	bone marrow	AML with normal karyotype + other abnormalities
-	GSM330634	MILES stage 1 data N1_0998	Leukemia patient sample	bone marrow	AML with normal karyotype + other abnormalities
-	GSM330635	MILES stage 1 data N1_0999	Leukemia patient sample	bone marrow	AML with normal karyotype + other abnormalities
-	GSM330636	MILES stage 1 data N1_1000	Leukemia patient sample	bone marrow	AML with normal karyotype + other abnormalities
-	GSM330637	MILES stage 1 data N1_1001	Leukemia patient sample	bone marrow	AML with normal karyotype + other abnormalities
-	GSM330638	MILES stage 1 data N1_1002	Leukemia patient sample	bone marrow	AML with normal karyotype + other abnormalities
-	GSM330639	MILES stage 1 data N1_1003	Leukemia patient sample	bone marrow	AML with normal karyotype + other abnormalities
-	GSM330640	MILES stage 1 data N1_1004	Leukemia patient sample	bone marrow	AML with normal karyotype + other abnormalities
-	GSM330641	MILES stage 1 data N1_1005	Leukemia patient sample	bone marrow	AML with normal karyotype + other abnormalities
-	GSM330642	MILES stage 1 data N1_1006	Leukemia patient sample	bone marrow	AML with normal karyotype + other abnormalities
-	GSM330643	MILES stage 1 data N1_1007	Leukemia patient sample	bone marrow	AML with normal karyotype + other abnormalities
-	GSM330644	MILES stage 1 data N1_1008	Leukemia patient sample	bone marrow	AML with normal karyotype + other abnormalities
-	GSM330645	MILES stage 1 data N1_1009	Leukemia patient sample	bone marrow	AML with normal karyotype + other abnormalities
-	GSM330646	MILES stage 1 data N1_1010	Leukemia patient sample	bone marrow	AML with normal karyotype + other abnormalities
-	GSM330647	MILES stage 1 data N1_1011	Leukemia patient sample	bone marrow	AML with normal karyotype + other abnormalities
-	GSM330648	MILES stage 1 data N1_1012	Leukemia patient sample	bone marrow	AML with normal karyotype + other abnormalities
-	GSM330649	MILES stage 1 data N1_1013	Leukemia patient sample	bone marrow	AML with normal karyotype + other abnormalities
-	GSM330650	MILES stage 1 data N1_1014	Leukemia patient sample	bone marrow	AML with normal karyotype + other abnormalities
-	GSM330651	MILES stage 1 data N1_1015	Leukemia patient sample	bone marrow	AML with normal karyotype + other abnormalities
-	GSM330652	MILES stage 1 data N1_1016	Leukemia patient sample	bone marrow	AML with normal karyotype + other abnormalities
-	GSM330653	MILES stage 1 data N1_1017	Leukemia patient sample	bone marrow	AML with normal karyotype + other abnormalities
-	GSM330654	MILES stage 1 data N1_1018	Leukemia patient sample	bone marrow	AML with normal karyotype + other abnormalities
-	GSM330655	MILES stage 1 data N1_1019	Leukemia patient sample	bone marrow	AML with normal karyotype + other abnormalities
-	GSM330656	MILES stage 1 data N1_1020	Leukemia patient sample	bone marrow	AML with normal karyotype + other abnormalities
-	GSM330657	MILES stage 1 data N1_1021	Leukemia patient sample	bone marrow	AML with normal karyotype + other abnormalities
-	GSM330658	MILES stage 1 data N1_1022	Leukemia patient sample	bone marrow	AML with normal karyotype + other abnormalities
-	GSM330659	MILES stage 1 data N1_1023	Leukemia patient sample	bone marrow	AML with normal karyotype + other abnormalities
-	GSM330660	MILES stage 1 data N1_1024	Leukemia patient sample	bone marrow	AML with normal karyotype + other abnormalities
-	GSM330661	MILES stage 1 data N1_1025	Leukemia patient sample	bone marrow	AML with normal karyotype + other abnormalities
-	GSM330662	MILES stage 1 data N1_1026	Leukemia patient sample	bone marrow	AML with normal karyotype + other abnormalities
-	GSM330663	MILES stage 1 data N1_1027	Leukemia patient sample	bone marrow	AML with normal karyotype + other abnormalities
-	GSM330664	MILES stage 1 data N1_1028	Leukemia patient sample	bone marrow	AML with normal karyotype + other abnormalities
-	GSM330665	MILES stage 1 data N1_1029	Leukemia patient sample	bone marrow	AML with normal karyotype + other abnormalities
-	GSM330666	MILES stage 1 data N1_1030	Leukemia patient sample	bone marrow	AML with normal karyotype + other abnormalities
-	GSM330667	MILES stage 1 data N1_1031	Leukemia patient sample	bone marrow	AML with normal karyotype + other abnormalities
-	GSM330668	MILES stage 1 data N1_1032	Leukemia patient sample	peripheral blood	AML with normal karyotype + other abnormalities
-	GSM330669	MILES stage 1 data N1_1033	Leukemia patient sample	bone marrow	AML with normal karyotype + other abnormalities
-	GSM330670	MILES stage 1 data N1_1034	Leukemia patient sample	bone marrow	AML with normal karyotype + other abnormalities
-	GSM330671	MILES stage 1 data N1_1035	Leukemia patient sample	bone marrow	AML with normal karyotype + other abnormalities
-	GSM330672	MILES stage 1 data N1_1036	Leukemia patient sample	bone marrow	AML with normal karyotype + other abnormalities
-	GSM330673	MILES stage 1 data N1_1037	Leukemia patient sample	bone marrow	AML with normal karyotype + other abnormalities
-	GSM330674	MILES stage 1 data N1_1038	Leukemia patient sample	bone marrow	AML with normal karyotype + other abnormalities
-	GSM330675	MILES stage 1 data N1_1039	Leukemia patient sample	bone marrow	AML with normal karyotype + other abnormalities
-	GSM330676	MILES stage 1 data N1_1040	Leukemia patient sample	bone marrow	AML with normal karyotype + other abnormalities
-	GSM330677	MILES stage 1 data N1_1041	Leukemia patient sample	bone marrow	AML with normal karyotype + other abnormalities
-	GSM330678	MILES stage 1 data N1_1042	Leukemia patient sample	bone marrow	AML with normal karyotype + other abnormalities
-	GSM330679	MILES stage 1 data N1_1043	Leukemia patient sample	bone marrow	AML with normal karyotype + other abnormalities
-	GSM330680	MILES stage 1 data N1_1044	Leukemia patient sample	bone marrow	AML with normal karyotype + other abnormalities
-	GSM330681	MILES stage 1 data N1_1045	Leukemia patient sample	bone marrow	AML with normal karyotype + other abnormalities
-	GSM330682	MILES stage 1 data N1_1046	Leukemia patient sample	bone marrow	AML with normal karyotype + other abnormalities
-	GSM330683	MILES stage 1 data N1_1047	Leukemia patient sample	bone marrow	AML with normal karyotype + other abnormalities
-	GSM330684	MILES stage 1 data N1_1048	Leukemia patient sample	bone marrow	AML with normal karyotype + other abnormalities
-	GSM330685	MILES stage 1 data N1_1049	Leukemia patient sample	bone marrow	AML with normal karyotype + other abnormalities
-	GSM330686	MILES stage 1 data N1_1050	Leukemia patient sample	bone marrow	AML with normal karyotype + other abnormalities
-	GSM330687	MILES stage 1 data N1_1051	Leukemia patient sample	bone marrow	AML with normal karyotype + other abnormalities
-	GSM330688	MILES stage 1 data N1_1052	Leukemia patient sample	bone marrow	AML with normal karyotype + other abnormalities
-	GSM330689	MILES stage 1 data N1_1053	Leukemia patient sample	bone marrow	AML with normal karyotype + other abnormalities
-	GSM330690	MILES stage 1 data N1_1054	Leukemia patient sample	bone marrow	AML with normal karyotype + other abnormalities
-	GSM330691	MILES stage 1 data N1_1055	Leukemia patient sample	bone marrow	AML with normal karyotype + other abnormalities
-	GSM330692	MILES stage 1 data N1_1056	Leukemia patient sample	bone marrow	AML with normal karyotype + other abnormalities
-	GSM330693	MILES stage 1 data N1_1057	Leukemia patient sample	bone marrow	AML with normal karyotype + other abnormalities
-	GSM330694	MILES stage 1 data N1_1058	Leukemia patient sample	peripheral blood	AML with normal karyotype + other abnormalities
-	GSM330695	MILES stage 1 data N1_1059	Leukemia patient sample	bone marrow	AML with normal karyotype + other abnormalities
-	GSM330696	MILES stage 1 data N1_1060	Leukemia patient sample	bone marrow	AML with normal karyotype + other abnormalities
-	GSM330697	MILES stage 1 data N1_1061	Leukemia patient sample	bone marrow	AML with normal karyotype + other abnormalities
-	GSM330698	MILES stage 1 data N1_1062	Leukemia patient sample	bone marrow	AML with normal karyotype + other abnormalities
-	GSM330699	MILES stage 1 data N1_1063	Leukemia patient sample	bone marrow	AML with normal karyotype + other abnormalities
-	GSM330700	MILES stage 1 data N1_1064	Leukemia patient sample	peripheral blood	AML with normal karyotype + other abnormalities
-	GSM330701	MILES stage 1 data N1_1065	Leukemia patient sample	bone marrow	AML with normal karyotype + other abnormalities
-	GSM330702	MILES stage 1 data N1_1066	Leukemia patient sample	bone marrow	AML with normal karyotype + other abnormalities
-	GSM330703	MILES stage 1 data N1_1067	Leukemia patient sample	bone marrow	AML with normal karyotype + other abnormalities
-	GSM330704	MILES stage 1 data N1_1068	Leukemia patient sample	bone marrow	AML with normal karyotype + other abnormalities
-	GSM330705	MILES stage 1 data N1_1069	Leukemia patient sample	bone marrow	AML with normal karyotype + other abnormalities
-	GSM330706	MILES stage 1 data N1_1070	Leukemia patient sample	peripheral blood	AML with normal karyotype + other abnormalities
-	GSM330707	MILES stage 1 data N1_1071	Leukemia patient sample	bone marrow	AML with normal karyotype + other abnormalities
-	GSM330708	MILES stage 1 data N1_1072	Leukemia patient sample	bone marrow	AML with normal karyotype + other abnormalities
-	GSM330709	MILES stage 1 data N1_1073	Leukemia patient sample	bone marrow	AML with normal karyotype + other abnormalities
-	GSM330710	MILES stage 1 data N1_1074	Leukemia patient sample	bone marrow	AML with normal karyotype + other abnormalities
-	GSM330711	MILES stage 1 data N1_1075	Leukemia patient sample	bone marrow	AML with normal karyotype + other abnormalities
-	GSM330712	MILES stage 1 data N1_1076	Leukemia patient sample	peripheral blood	AML with normal karyotype + other abnormalities
-	GSM330713	MILES stage 1 data N1_1077	Leukemia patient sample	bone marrow	AML with normal karyotype + other abnormalities
-	GSM330714	MILES stage 1 data N1_1078	Leukemia patient sample	bone marrow	AML with normal karyotype + other abnormalities
-	GSM330715	MILES stage 1 data N1_1079	Leukemia patient sample	bone marrow	AML with normal karyotype + other abnormalities
-	GSM330716	MILES stage 1 data N1_1080	Leukemia patient sample	bone marrow	AML with normal karyotype + other abnormalities
-	GSM330717	MILES stage 1 data N1_1081	Leukemia patient sample	bone marrow	AML with normal karyotype + other abnormalities
-	GSM330718	MILES stage 1 data N1_1082	Leukemia patient sample	bone marrow	AML with normal karyotype + other abnormalities
-	GSM330719	MILES stage 1 data N1_1083	Leukemia patient sample	bone marrow	AML with normal karyotype + other abnormalities
-	GSM330720	MILES stage 1 data N1_1084	Leukemia patient sample	bone marrow	AML with normal karyotype + other abnormalities
-	GSM330721	MILES stage 1 data N1_1085	Leukemia patient sample	peripheral blood	AML with normal karyotype + other abnormalities
-	GSM330722	MILES stage 1 data N1_1086	Leukemia patient sample	bone marrow	AML with normal karyotype + other abnormalities
-	GSM330723	MILES stage 1 data N1_1087	Leukemia patient sample	bone marrow	AML with normal karyotype + other abnormalities
-	GSM330724	MILES stage 1 data N1_1088	Leukemia patient sample	bone marrow	AML with normal karyotype + other abnormalities
-	GSM330725	MILES stage 1 data N1_1089	Leukemia patient sample	bone marrow	AML with normal karyotype + other abnormalities
-	GSM330726	MILES stage 1 data N1_1090	Leukemia patient sample	bone marrow	AML with normal karyotype + other abnormalities
-	GSM330727	MILES stage 1 data N1_1091	Leukemia patient sample	bone marrow	AML with normal karyotype + other abnormalities
-	GSM330728	MILES stage 1 data N1_1092	Leukemia patient sample	bone marrow	AML with normal karyotype + other abnormalities
-	GSM330729	MILES stage 1 data N1_1093	Leukemia patient sample	bone marrow	AML with normal karyotype + other abnormalities
-	GSM330730	MILES stage 1 data N1_1094	Leukemia patient sample	bone marrow	AML with normal karyotype + other abnormalities
-	GSM330731	MILES stage 1 data N1_1095	Leukemia patient sample	bone marrow	AML with normal karyotype + other abnormalities
-	GSM330732	MILES stage 1 data N1_1096	Leukemia patient sample	bone marrow	AML with normal karyotype + other abnormalities
-	GSM330733	MILES stage 1 data N1_1097	Leukemia patient sample	bone marrow	AML with normal karyotype + other abnormalities
-	GSM330734	MILES stage 1 data N1_1098	Leukemia patient sample	bone marrow	AML with normal karyotype + other abnormalities
-	GSM330735	MILES stage 1 data N1_1099	Leukemia patient sample	bone marrow	AML with normal karyotype + other abnormalities
-	GSM330736	MILES stage 1 data N1_1100	Leukemia patient sample	bone marrow	AML with normal karyotype + other abnormalities
-	GSM330737	MILES stage 1 data N1_1101	Leukemia patient sample	bone marrow	AML with normal karyotype + other abnormalities
-	GSM330738	MILES stage 1 data N1_1102	Leukemia patient sample	bone marrow	AML with normal karyotype + other abnormalities
-	GSM330739	MILES stage 1 data N1_1103	Leukemia patient sample	bone marrow	AML with normal karyotype + other abnormalities
-	GSM330740	MILES stage 1 data N1_1104	Leukemia patient sample	bone marrow	AML with normal karyotype + other abnormalities
-	GSM330741	MILES stage 1 data N1_1105	Leukemia patient sample	bone marrow	AML with normal karyotype + other abnormalities
-	GSM330742	MILES stage 1 data N1_1106	Leukemia patient sample	bone marrow	AML with normal karyotype + other abnormalities
-	GSM330743	MILES stage 1 data N1_1107	Leukemia patient sample	bone marrow	AML with normal karyotype + other abnormalities
-	GSM330744	MILES stage 1 data N1_1108	Leukemia patient sample	bone marrow	AML with normal karyotype + other abnormalities
-	GSM330745	MILES stage 1 data N1_1109	Leukemia patient sample	bone marrow	AML with normal karyotype + other abnormalities
-	GSM330746	MILES stage 1 data N1_1110	Leukemia patient sample	bone marrow	AML with normal karyotype + other abnormalities
-	GSM330747	MILES stage 1 data N1_1111	Leukemia patient sample	bone marrow	AML with normal karyotype + other abnormalities
-	GSM330748	MILES stage 1 data N1_1112	Leukemia patient sample	bone marrow	AML with normal karyotype + other abnormalities
-	GSM330749	MILES stage 1 data N1_1113	Leukemia patient sample	peripheral blood	AML with normal karyotype + other abnormalities
-	GSM330750	MILES stage 1 data N1_1114	Leukemia patient sample	bone marrow	AML with normal karyotype + other abnormalities
-	GSM330751	MILES stage 1 data N1_1115	Leukemia patient sample	bone marrow	AML with normal karyotype + other abnormalities
-	GSM330752	MILES stage 1 data N1_1116	Leukemia patient sample	bone marrow	AML with normal karyotype + other abnormalities
-	GSM330753	MILES stage 1 data N1_1117	Leukemia patient sample	bone marrow	AML with normal karyotype + other abnormalities
-	GSM330754	MILES stage 1 data N1_1118	Leukemia patient sample	bone marrow	AML with normal karyotype + other abnormalities
-	GSM330755	MILES stage 1 data N1_1119	Leukemia patient sample	bone marrow	AML with normal karyotype + other abnormalities
-	GSM330756	MILES stage 1 data N1_1120	Leukemia patient sample	bone marrow	AML with normal karyotype + other abnormalities
-	GSM330757	MILES stage 1 data N1_1121	Leukemia patient sample	bone marrow	AML with normal karyotype + other abnormalities
-	GSM330758	MILES stage 1 data N1_1122	Leukemia patient sample	bone marrow	AML with normal karyotype + other abnormalities
-	GSM330759	MILES stage 1 data N1_1123	Leukemia patient sample	bone marrow	AML with normal karyotype + other abnormalities
-	GSM330760	MILES stage 1 data N1_1124	Leukemia patient sample	bone marrow	AML with normal karyotype + other abnormalities
-	GSM330761	MILES stage 1 data N1_1125	Leukemia patient sample	bone marrow	AML with normal karyotype + other abnormalities
-	GSM330762	MILES stage 1 data N1_1126	Leukemia patient sample	bone marrow	AML with normal karyotype + other abnormalities
-	GSM330763	MILES stage 1 data N1_1127	Leukemia patient sample	bone marrow	AML with normal karyotype + other abnormalities
-	GSM330764	MILES stage 1 data N1_1128	Leukemia patient sample	peripheral blood	AML with normal karyotype + other abnormalities
-	GSM330765	MILES stage 1 data N1_1129	Leukemia patient sample	bone marrow	AML with normal karyotype + other abnormalities
-	GSM330766	MILES stage 1 data N1_1130	Leukemia patient sample	bone marrow	AML with normal karyotype + other abnormalities
-	GSM330767	MILES stage 1 data N1_1131	Leukemia patient sample	bone marrow	AML with normal karyotype + other abnormalities
-	GSM330768	MILES stage 1 data N1_1132	Leukemia patient sample	bone marrow	AML with normal karyotype + other abnormalities
-	GSM330769	MILES stage 1 data N1_1133	Leukemia patient sample	bone marrow	AML with normal karyotype + other abnormalities
-	GSM330770	MILES stage 1 data N1_1134	Leukemia patient sample	bone marrow	AML with normal karyotype + other abnormalities
-	GSM330771	MILES stage 1 data N1_1135	Leukemia patient sample	bone marrow	AML with normal karyotype + other abnormalities
-	GSM330772	MILES stage 1 data N1_1136	Leukemia patient sample	bone marrow	AML with normal karyotype + other abnormalities
-	GSM330773	MILES stage 1 data N1_1137	Leukemia patient sample	bone marrow	AML with normal karyotype + other abnormalities
-	GSM330774	MILES stage 1 data N1_1138	Leukemia patient sample	bone marrow	AML with normal karyotype + other abnormalities
-	GSM330775	MILES stage 1 data N1_1139	Leukemia patient sample	bone marrow	AML with normal karyotype + other abnormalities
-	GSM330776	MILES stage 1 data N1_1140	Leukemia patient sample	bone marrow	AML with normal karyotype + other abnormalities
-	GSM330777	MILES stage 1 data N1_1141	Leukemia patient sample	bone marrow	AML with normal karyotype + other abnormalities
-	GSM330778	MILES stage 1 data N1_1142	Leukemia patient sample	bone marrow	AML with normal karyotype + other abnormalities
-	GSM330779	MILES stage 1 data N1_1143	Leukemia patient sample	peripheral blood	AML with normal karyotype + other abnormalities
-	GSM330780	MILES stage 1 data N1_1144	Leukemia patient sample	bone marrow	AML with normal karyotype + other abnormalities
-	GSM330781	MILES stage 1 data N1_1145	Leukemia patient sample	bone marrow	AML with normal karyotype + other abnormalities
-	GSM330782	MILES stage 1 data N1_1146	Leukemia patient sample	bone marrow	AML with normal karyotype + other abnormalities
-	GSM330783	MILES stage 1 data N1_1147	Leukemia patient sample	peripheral blood	AML with normal karyotype + other abnormalities
-	GSM330784	MILES stage 1 data N1_1148	Leukemia patient sample	bone marrow	AML with normal karyotype + other abnormalities
-	GSM330785	MILES stage 1 data N1_1149	Leukemia patient sample	bone marrow	AML with normal karyotype + other abnormalities
-	GSM330786	MILES stage 1 data N1_1150	Leukemia patient sample	bone marrow	AML with normal karyotype + other abnormalities
-	GSM330787	MILES stage 1 data N1_1151	Leukemia patient sample	bone marrow	AML with normal karyotype + other abnormalities
-	GSM330788	MILES stage 1 data N1_1152	Leukemia patient sample	bone marrow	AML with normal karyotype + other abnormalities
-	GSM330789	MILES stage 1 data N1_1153	Leukemia patient sample	bone marrow	AML with normal karyotype + other abnormalities
-	GSM330790	MILES stage 1 data N1_1154	Leukemia patient sample	bone marrow	AML with normal karyotype + other abnormalities
-	GSM330791	MILES stage 1 data N1_1155	Leukemia patient sample	bone marrow	AML with normal karyotype + other abnormalities
-	GSM330792	MILES stage 1 data N1_1156	Leukemia patient sample	bone marrow	AML with normal karyotype + other abnormalities
-	GSM330793	MILES stage 1 data N1_1157	Leukemia patient sample	bone marrow	AML with normal karyotype + other abnormalities
-	GSM330794	MILES stage 1 data N1_1158	Leukemia patient sample	peripheral blood	AML with normal karyotype + other abnormalities
-	GSM330795	MILES stage 1 data N1_1159	Leukemia patient sample	peripheral blood	AML with normal karyotype + other abnormalities
-	GSM330796	MILES stage 1 data N1_1160	Leukemia patient sample	bone marrow	AML with normal karyotype + other abnormalities
-	GSM330797	MILES stage 1 data N1_1161	Leukemia patient sample	bone marrow	AML with normal karyotype + other abnormalities
-	GSM330798	MILES stage 1 data N1_1162	Leukemia patient sample	bone marrow	AML with normal karyotype + other abnormalities
-	GSM330799	MILES stage 1 data N1_1163	Leukemia patient sample	bone marrow	AML with normal karyotype + other abnormalities
-	GSM330800	MILES stage 1 data N1_1164	Leukemia patient sample	bone marrow	AML with normal karyotype + other abnormalities
-	GSM330801	MILES stage 1 data N1_1165	Leukemia patient sample	bone marrow	AML with normal karyotype + other abnormalities
-	GSM330802	MILES stage 1 data N1_1166	Leukemia patient sample	bone marrow	AML with normal karyotype + other abnormalities
-	GSM330803	MILES stage 1 data N1_1167	Leukemia patient sample	bone marrow	AML with normal karyotype + other abnormalities
-	GSM330804	MILES stage 1 data N1_1168	Leukemia patient sample	bone marrow	AML with normal karyotype + other abnormalities
-	GSM330805	MILES stage 1 data N1_1169	Leukemia patient sample	bone marrow	AML with normal karyotype + other abnormalities
-	GSM330806	MILES stage 1 data N1_1170	Leukemia patient sample	bone marrow	AML with normal karyotype + other abnormalities
-	GSM330807	MILES stage 1 data N1_1171	Leukemia patient sample	bone marrow	AML with normal karyotype + other abnormalities
-	GSM330808	MILES stage 1 data N1_1172	Leukemia patient sample	bone marrow	AML with normal karyotype + other abnormalities
-	GSM330809	MILES stage 1 data N1_1173	Leukemia patient sample	bone marrow	AML with normal karyotype + other abnormalities
-	GSM330810	MILES stage 1 data N1_1174	Leukemia patient sample	bone marrow	AML with normal karyotype + other abnormalities
-	GSM330811	MILES stage 1 data N1_1175	Leukemia patient sample	bone marrow	AML with normal karyotype + other abnormalities
-	GSM330812	MILES stage 1 data N1_1176	Leukemia patient sample	bone marrow	AML with normal karyotype + other abnormalities
-	GSM330813	MILES stage 1 data N1_1177	Leukemia patient sample	bone marrow	AML with normal karyotype + other abnormalities
-	GSM330814	MILES stage 1 data N1_1178	Leukemia patient sample	bone marrow	AML with normal karyotype + other abnormalities
-	GSM330815	MILES stage 1 data N1_1179	Leukemia patient sample	bone marrow	AML with normal karyotype + other abnormalities
-	GSM330816	MILES stage 1 data N1_1180	Leukemia patient sample	bone marrow	AML with normal karyotype + other abnormalities
-	GSM330817	MILES stage 1 data N1_1181	Leukemia patient sample	bone marrow	AML with normal karyotype + other abnormalities
-	GSM330818	MILES stage 1 data N1_1182	Leukemia patient sample	bone marrow	AML with normal karyotype + other abnormalities
-	GSM330819	MILES stage 1 data N1_1183	Leukemia patient sample	bone marrow	AML with normal karyotype + other abnormalities
-	GSM330820	MILES stage 1 data N1_1184	Leukemia patient sample	bone marrow	AML with normal karyotype + other abnormalities
-	GSM330821	MILES stage 1 data N1_1185	Leukemia patient sample	bone marrow	AML with normal karyotype + other abnormalities
-	GSM330822	MILES stage 1 data N1_1186	Leukemia patient sample	bone marrow	AML with normal karyotype + other abnormalities
-	GSM330823	MILES stage 1 data N1_1187	Leukemia patient sample	bone marrow	AML with normal karyotype + other abnormalities
-	GSM330824	MILES stage 1 data N1_1188	Leukemia patient sample	bone marrow	AML with normal karyotype + other abnormalities
-	GSM330825	MILES stage 1 data N1_1189	Leukemia patient sample	bone marrow	AML with normal karyotype + other abnormalities
-	GSM330826	MILES stage 1 data N1_1190	Leukemia patient sample	peripheral blood	AML with normal karyotype + other abnormalities
-	GSM330827	MILES stage 1 data N1_1191	Leukemia patient sample	bone marrow	AML with normal karyotype + other abnormalities
-	GSM330828	MILES stage 1 data N1_1192	Leukemia patient sample	bone marrow	AML with normal karyotype + other abnormalities
-	GSM330829	MILES stage 1 data N1_1193	Leukemia patient sample	bone marrow	AML with normal karyotype + other abnormalities
-	GSM330830	MILES stage 1 data N1_1194	Leukemia patient sample	bone marrow	AML with normal karyotype + other abnormalities
-	GSM330831	MILES stage 1 data N1_1195	Leukemia patient sample	bone marrow	AML with normal karyotype + other abnormalities
-	GSM330832	MILES stage 1 data N1_1196	Leukemia patient sample	peripheral blood	AML with normal karyotype + other abnormalities
-	GSM330833	MILES stage 1 data N1_1197	Leukemia patient sample	bone marrow	AML with normal karyotype + other abnormalities
-	GSM330834	MILES stage 1 data N1_1198	Leukemia patient sample	bone marrow	AML with normal karyotype + other abnormalities
-	GSM330835	MILES stage 1 data N1_1199	Leukemia patient sample	bone marrow	AML with normal karyotype + other abnormalities
-	GSM330836	MILES stage 1 data N1_1200	Leukemia patient sample	bone marrow	AML with normal karyotype + other abnormalities
-	GSM330837	MILES stage 1 data N1_1201	Leukemia patient sample	bone marrow	AML with normal karyotype + other abnormalities
-	GSM330838	MILES stage 1 data N1_1202	Leukemia patient sample	bone marrow	AML with normal karyotype + other abnormalities
-	GSM330839	MILES stage 1 data N1_1203	Leukemia patient sample	bone marrow	AML with normal karyotype + other abnormalities
-	GSM330840	MILES stage 1 data N1_1204	Leukemia patient sample	bone marrow	AML with normal karyotype + other abnormalities
-	GSM330841	MILES stage 1 data N1_1205	Leukemia patient sample	bone marrow	AML with normal karyotype + other abnormalities
-	GSM330842	MILES stage 1 data N1_1206	Leukemia patient sample	bone marrow	AML with normal karyotype + other abnormalities
-	GSM330843	MILES stage 1 data N1_1207	Leukemia patient sample	peripheral blood	AML with normal karyotype + other abnormalities
-	GSM330844	MILES stage 1 data N1_1208	Leukemia patient sample	bone marrow	AML with normal karyotype + other abnormalities
-	GSM330845	MILES stage 1 data N1_1209	Leukemia patient sample	bone marrow	AML with normal karyotype + other abnormalities
-	GSM330846	MILES stage 1 data N1_1210	Leukemia patient sample	bone marrow	AML with normal karyotype + other abnormalities
-	GSM330847	MILES stage 1 data N1_1211	Leukemia patient sample	bone marrow	AML with normal karyotype + other abnormalities
-	GSM330848	MILES stage 1 data N1_1212	Leukemia patient sample	bone marrow	AML with normal karyotype + other abnormalities
-	GSM330849	MILES stage 1 data N1_1213	Leukemia patient sample	bone marrow	AML with normal karyotype + other abnormalities
-	GSM330850	MILES stage 1 data N1_1214	Leukemia patient sample	bone marrow	AML with normal karyotype + other abnormalities
-	GSM330851	MILES stage 1 data N1_1215	Leukemia patient sample	bone marrow	AML with normal karyotype + other abnormalities
-	GSM330852	MILES stage 1 data N1_1216	Leukemia patient sample	bone marrow	AML with normal karyotype + other abnormalities
-	GSM330853	MILES stage 1 data N1_1217	Leukemia patient sample	bone marrow	AML with normal karyotype + other abnormalities
-	GSM330854	MILES stage 1 data N1_1218	Leukemia patient sample	bone marrow	AML with normal karyotype + other abnormalities
-	GSM330855	MILES stage 1 data N1_1219	Leukemia patient sample	bone marrow	AML with normal karyotype + other abnormalities
-	GSM330856	MILES stage 1 data N1_1220	Leukemia patient sample	peripheral blood	AML with normal karyotype + other abnormalities
-	GSM330857	MILES stage 1 data N1_1221	Leukemia patient sample	bone marrow	AML with normal karyotype + other abnormalities
-	GSM330858	MILES stage 1 data N1_1222	Leukemia patient sample	bone marrow	AML with normal karyotype + other abnormalities
-	GSM330859	MILES stage 1 data N1_1223	Leukemia patient sample	bone marrow	AML with normal karyotype + other abnormalities
-	GSM330860	MILES stage 1 data N1_1224	Leukemia patient sample	bone marrow	AML with normal karyotype + other abnormalities
-	GSM330861	MILES stage 1 data N1_1225	Leukemia patient sample	bone marrow	AML with normal karyotype + other abnormalities
-	GSM330862	MILES stage 1 data N1_1226	Leukemia patient sample	bone marrow	AML with normal karyotype + other abnormalities
-	GSM330863	MILES stage 1 data N1_1227	Leukemia patient sample	bone marrow	AML with normal karyotype + other abnormalities
-	GSM330864	MILES stage 1 data N1_1228	Leukemia patient sample	bone marrow	AML with normal karyotype + other abnormalities
-	GSM330865	MILES stage 1 data N1_1229	Leukemia patient sample	bone marrow	AML with normal karyotype + other abnormalities
-	GSM330866	MILES stage 1 data N1_1230	Leukemia patient sample	bone marrow	AML with normal karyotype + other abnormalities
-	GSM330867	MILES stage 1 data N1_1231	Leukemia patient sample	bone marrow	AML with normal karyotype + other abnormalities
-	GSM330868	MILES stage 1 data N1_1232	Leukemia patient sample	bone marrow	AML with normal karyotype + other abnormalities
-	GSM330869	MILES stage 1 data N1_1233	Leukemia patient sample	bone marrow	AML with normal karyotype + other abnormalities
-	GSM330870	MILES stage 1 data N1_1234	Leukemia patient sample	bone marrow	AML with normal karyotype + other abnormalities
-	GSM330871	MILES stage 1 data N1_1235	Leukemia patient sample	bone marrow	AML with normal karyotype + other abnormalities
-	GSM330872	MILES stage 1 data N1_1236	Leukemia patient sample	bone marrow	AML with normal karyotype + other abnormalities
-	GSM330873	MILES stage 1 data N1_1237	Leukemia patient sample	bone marrow	AML with normal karyotype + other abnormalities
-	GSM330874	MILES stage 1 data N1_1238	Leukemia patient sample	bone marrow	AML with normal karyotype + other abnormalities
-	GSM330875	MILES stage 1 data N1_1239	Leukemia patient sample	peripheral blood	AML with normal karyotype + other abnormalities
-	GSM330876	MILES stage 1 data N1_1240	Leukemia patient sample	bone marrow	AML with normal karyotype + other abnormalities
-	GSM330877	MILES stage 1 data N1_1241	Leukemia patient sample	bone marrow	AML complex aberrant karyotype
-	GSM330878	MILES stage 1 data N1_1242	Leukemia patient sample	bone marrow	AML complex aberrant karyotype
-	GSM330879	MILES stage 1 data N1_1243	Leukemia patient sample	bone marrow	AML complex aberrant karyotype
-	GSM330880	MILES stage 1 data N1_1244	Leukemia patient sample	bone marrow	AML with normal karyotype + other abnormalities
-	GSM330881	MILES stage 1 data N1_1245	Leukemia patient sample	bone marrow	AML complex aberrant karyotype
-	GSM330882	MILES stage 1 data N1_1246	Leukemia patient sample	bone marrow	AML complex aberrant karyotype
-	GSM330883	MILES stage 1 data N1_1247	Leukemia patient sample	bone marrow	AML complex aberrant karyotype
-	GSM330884	MILES stage 1 data N1_1248	Leukemia patient sample	bone marrow	AML complex aberrant karyotype
-	GSM330885	MILES stage 1 data N1_1249	Leukemia patient sample	bone marrow	AML complex aberrant karyotype
-	GSM330886	MILES stage 1 data N1_1250	Leukemia patient sample	bone marrow	AML complex aberrant karyotype
-	GSM330887	MILES stage 1 data N1_1251	Leukemia patient sample	bone marrow	AML with normal karyotype + other abnormalities
-	GSM330888	MILES stage 1 data N1_1252	Leukemia patient sample	bone marrow	AML complex aberrant karyotype
-	GSM330889	MILES stage 1 data N1_1253	Leukemia patient sample	bone marrow	AML with normal karyotype + other abnormalities
-	GSM330890	MILES stage 1 data N1_1254	Leukemia patient sample	bone marrow	AML complex aberrant karyotype
-	GSM330891	MILES stage 1 data N1_1255	Leukemia patient sample	bone marrow	AML complex aberrant karyotype
-	GSM330892	MILES stage 1 data N1_1256	Leukemia patient sample	bone marrow	AML complex aberrant karyotype
-	GSM330893	MILES stage 1 data N1_1257	Leukemia patient sample	bone marrow	AML complex aberrant karyotype
-	GSM330894	MILES stage 1 data N1_1258	Leukemia patient sample	bone marrow	AML complex aberrant karyotype
-	GSM330895	MILES stage 1 data N1_1259	Leukemia patient sample	bone marrow	AML complex aberrant karyotype
-	GSM330896	MILES stage 1 data N1_1260	Leukemia patient sample	bone marrow	AML complex aberrant karyotype
-	GSM330897	MILES stage 1 data N1_1261	Leukemia patient sample	bone marrow	AML complex aberrant karyotype
-	GSM330898	MILES stage 1 data N1_1262	Leukemia patient sample	bone marrow	AML complex aberrant karyotype
-	GSM330899	MILES stage 1 data N1_1263	Leukemia patient sample	bone marrow	AML complex aberrant karyotype
-	GSM330900	MILES stage 1 data N1_1264	Leukemia patient sample	bone marrow	AML complex aberrant karyotype
-	GSM330901	MILES stage 1 data N1_1265	Leukemia patient sample	bone marrow	AML complex aberrant karyotype
-	GSM330902	MILES stage 1 data N1_1266	Leukemia patient sample	bone marrow	AML complex aberrant karyotype
-	GSM330903	MILES stage 1 data N1_1267	Leukemia patient sample	bone marrow	AML complex aberrant karyotype
-	GSM330904	MILES stage 1 data N1_1268	Leukemia patient sample	bone marrow	AML complex aberrant karyotype
-	GSM330905	MILES stage 1 data N1_1269	Leukemia patient sample	bone marrow	AML complex aberrant karyotype
-	GSM330906	MILES stage 1 data N1_1270	Leukemia patient sample	bone marrow	AML complex aberrant karyotype
-	GSM330907	MILES stage 1 data N1_1271	Leukemia patient sample	bone marrow	AML complex aberrant karyotype
-	GSM330908	MILES stage 1 data N1_1272	Leukemia patient sample	bone marrow	AML complex aberrant karyotype
-	GSM330909	MILES stage 1 data N1_1273	Leukemia patient sample	bone marrow	AML complex aberrant karyotype
-	GSM330910	MILES stage 1 data N1_1274	Leukemia patient sample	bone marrow	AML complex aberrant karyotype
-	GSM330911	MILES stage 1 data N1_1275	Leukemia patient sample	bone marrow	AML complex aberrant karyotype
-	GSM330912	MILES stage 1 data N1_1276	Leukemia patient sample	bone marrow	AML complex aberrant karyotype
-	GSM330913	MILES stage 1 data N1_1277	Leukemia patient sample	bone marrow	AML complex aberrant karyotype
-	GSM330914	MILES stage 1 data N1_1278	Leukemia patient sample	bone marrow	AML complex aberrant karyotype
-	GSM330915	MILES stage 1 data N1_1279	Leukemia patient sample	bone marrow	AML complex aberrant karyotype
-	GSM330916	MILES stage 1 data N1_1280	Leukemia patient sample	bone marrow	AML complex aberrant karyotype
-	GSM330917	MILES stage 1 data N1_1281	Leukemia patient sample	bone marrow	AML complex aberrant karyotype
-	GSM330918	MILES stage 1 data N1_1282	Leukemia patient sample	bone marrow	AML complex aberrant karyotype
-	GSM330919	MILES stage 1 data N1_1283	Leukemia patient sample	peripheral blood	AML complex aberrant karyotype
-	GSM330920	MILES stage 1 data N1_1284	Leukemia patient sample	bone marrow	AML with normal karyotype + other abnormalities
-	GSM330921	MILES stage 1 data N1_1285	Leukemia patient sample	bone marrow	AML complex aberrant karyotype
-	GSM330922	MILES stage 1 data N1_1286	Leukemia patient sample	bone marrow	AML complex aberrant karyotype
-	GSM330923	MILES stage 1 data N1_1287	Leukemia patient sample	bone marrow	AML complex aberrant karyotype
-	GSM330924	MILES stage 1 data N1_1288	Leukemia patient sample	peripheral blood	AML complex aberrant karyotype
-	GSM330925	MILES stage 1 data N1_1289	Leukemia patient sample	bone marrow	AML complex aberrant karyotype
-	GSM330926	MILES stage 1 data N1_1290	Leukemia patient sample	bone marrow	AML complex aberrant karyotype
-	GSM330927	MILES stage 1 data N1_1291	Leukemia patient sample	bone marrow	AML complex aberrant karyotype
-	GSM330928	MILES stage 1 data N1_1292	Leukemia patient sample	bone marrow	AML complex aberrant karyotype
-	GSM330929	MILES stage 1 data N1_1293	Leukemia patient sample	peripheral blood	CLL
-	GSM330930	MILES stage 1 data N1_1294	Leukemia patient sample	peripheral blood	CLL
-	GSM330931	MILES stage 1 data N1_1295	Leukemia patient sample	peripheral blood	CLL
-	GSM330932	MILES stage 1 data N1_1296	Leukemia patient sample	peripheral blood	CLL
-	GSM330933	MILES stage 1 data N1_1297	Leukemia patient sample	peripheral blood	CLL
-	GSM330934	MILES stage 1 data N1_1298	Leukemia patient sample	peripheral blood	CLL
-	GSM330935	MILES stage 1 data N1_1299	Leukemia patient sample	peripheral blood	CLL
-	GSM330936	MILES stage 1 data N1_1300	Leukemia patient sample	peripheral blood	CLL
-	GSM330937	MILES stage 1 data N1_1301	Leukemia patient sample	peripheral blood	CLL
-	GSM330938	MILES stage 1 data N1_1302	Leukemia patient sample	peripheral blood	CLL
-	GSM330939	MILES stage 1 data N1_1303	Leukemia patient sample	peripheral blood	CLL
-	GSM330940	MILES stage 1 data N1_1304	Leukemia patient sample	peripheral blood	CLL
-	GSM330941	MILES stage 1 data N1_1305	Leukemia patient sample	peripheral blood	CLL
-	GSM330942	MILES stage 1 data N1_1306	Leukemia patient sample	peripheral blood	CLL
-	GSM330943	MILES stage 1 data N1_1307	Leukemia patient sample	peripheral blood	CLL
-	GSM330944	MILES stage 1 data N1_1308	Leukemia patient sample	peripheral blood	CLL
-	GSM330945	MILES stage 1 data N1_1309	Leukemia patient sample	peripheral blood	CLL
-	GSM330946	MILES stage 1 data N1_1310	Leukemia patient sample	peripheral blood	CLL
-	GSM330947	MILES stage 1 data N1_1311	Leukemia patient sample	peripheral blood	CLL
-	GSM330948	MILES stage 1 data N1_1312	Leukemia patient sample	peripheral blood	CLL
-	GSM330949	MILES stage 1 data N1_1313	Leukemia patient sample	peripheral blood	CLL
-	GSM330950	MILES stage 1 data N1_1314	Leukemia patient sample	peripheral blood	CLL
-	GSM330951	MILES stage 1 data N1_1315	Leukemia patient sample	peripheral blood	CLL
-	GSM330952	MILES stage 1 data N1_1316	Leukemia patient sample	peripheral blood	CLL
-	GSM330953	MILES stage 1 data N1_1317	Leukemia patient sample	peripheral blood	CLL
-	GSM330954	MILES stage 1 data N1_1318	Leukemia patient sample	peripheral blood	CLL
-	GSM330955	MILES stage 1 data N1_1319	Leukemia patient sample	peripheral blood	CLL
-	GSM330956	MILES stage 1 data N1_1320	Leukemia patient sample	peripheral blood	CLL
-	GSM330957	MILES stage 1 data N1_1321	Leukemia patient sample	peripheral blood	CLL
-	GSM330958	MILES stage 1 data N1_1322	Leukemia patient sample	peripheral blood	CLL
-	GSM330959	MILES stage 1 data N1_1323	Leukemia patient sample	peripheral blood	CLL
-	GSM330960	MILES stage 1 data N1_1324	Leukemia patient sample	peripheral blood	CLL
-	GSM330961	MILES stage 1 data N1_1325	Leukemia patient sample	peripheral blood	CLL
-	GSM330962	MILES stage 1 data N1_1326	Leukemia patient sample	peripheral blood	CLL
-	GSM330963	MILES stage 1 data N1_1327	Leukemia patient sample	peripheral blood	CLL
-	GSM330964	MILES stage 1 data N1_1328	Leukemia patient sample	peripheral blood	CLL
-	GSM330965	MILES stage 1 data N1_1329	Leukemia patient sample	peripheral blood	CLL
-	GSM330966	MILES stage 1 data N1_1330	Leukemia patient sample	peripheral blood	CLL
-	GSM330967	MILES stage 1 data N1_1331	Leukemia patient sample	peripheral blood	CLL
-	GSM330968	MILES stage 1 data N1_1332	Leukemia patient sample	peripheral blood	CLL
-	GSM330969	MILES stage 1 data N1_1333	Leukemia patient sample	peripheral blood	CLL
-	GSM330970	MILES stage 1 data N1_1334	Leukemia patient sample	peripheral blood	CLL
-	GSM330971	MILES stage 1 data N1_1335	Leukemia patient sample	peripheral blood	CLL
-	GSM330972	MILES stage 1 data N1_1336	Leukemia patient sample	peripheral blood	CLL
-	GSM330973	MILES stage 1 data N1_1337	Leukemia patient sample	peripheral blood	CLL
-	GSM330974	MILES stage 1 data N1_1338	Leukemia patient sample	peripheral blood	CLL
-	GSM330975	MILES stage 1 data N1_1339	Leukemia patient sample	peripheral blood	CLL
-	GSM330976	MILES stage 1 data N1_1340	Leukemia patient sample	peripheral blood	CLL
-	GSM330977	MILES stage 1 data N1_1341	Leukemia patient sample	peripheral blood	CLL
-	GSM330978	MILES stage 1 data N1_1342	Leukemia patient sample	peripheral blood	CLL
-	GSM330979	MILES stage 1 data N1_1343	Leukemia patient sample	peripheral blood	CLL
-	GSM330980	MILES stage 1 data N1_1344	Leukemia patient sample	peripheral blood	CLL
-	GSM330981	MILES stage 1 data N1_1345	Leukemia patient sample	peripheral blood	CLL
-	GSM330982	MILES stage 1 data N1_1346	Leukemia patient sample	peripheral blood	CLL
-	GSM330983	MILES stage 1 data N1_1347	Leukemia patient sample	peripheral blood	CLL
-	GSM330984	MILES stage 1 data N1_1348	Leukemia patient sample	peripheral blood	CLL
-	GSM330985	MILES stage 1 data N1_1349	Leukemia patient sample	peripheral blood	CLL
-	GSM330986	MILES stage 1 data N1_1350	Leukemia patient sample	peripheral blood	CLL
-	GSM330987	MILES stage 1 data N1_1351	Leukemia patient sample	peripheral blood	CLL
-	GSM330988	MILES stage 1 data N1_1352	Leukemia patient sample	peripheral blood	CLL
-	GSM330989	MILES stage 1 data N1_1353	Leukemia patient sample	peripheral blood	CLL
-	GSM330990	MILES stage 1 data N1_1354	Leukemia patient sample	peripheral blood	CLL
-	GSM330991	MILES stage 1 data N1_1355	Leukemia patient sample	peripheral blood	CLL
-	GSM330992	MILES stage 1 data N1_1356	Leukemia patient sample	peripheral blood	CLL
-	GSM330993	MILES stage 1 data N1_1357	Leukemia patient sample	peripheral blood	CLL
-	GSM330994	MILES stage 1 data N1_1358	Leukemia patient sample	peripheral blood	CLL
-	GSM330995	MILES stage 1 data N1_1359	Leukemia patient sample	peripheral blood	CLL
-	GSM330996	MILES stage 1 data N1_1360	Leukemia patient sample	peripheral blood	CLL
-	GSM330997	MILES stage 1 data N1_1361	Leukemia patient sample	peripheral blood	CLL
-	GSM330998	MILES stage 1 data N1_1362	Leukemia patient sample	peripheral blood	CLL
-	GSM330999	MILES stage 1 data N1_1363	Leukemia patient sample	peripheral blood	CLL
-	GSM331000	MILES stage 1 data N1_1364	Leukemia patient sample	peripheral blood	CLL
-	GSM331001	MILES stage 1 data N1_1365	Leukemia patient sample	peripheral blood	CLL
-	GSM331002	MILES stage 1 data N1_1366	Leukemia patient sample	peripheral blood	CLL
-	GSM331003	MILES stage 1 data N1_1367	Leukemia patient sample	peripheral blood	CLL
-	GSM331004	MILES stage 1 data N1_1368	Leukemia patient sample	peripheral blood	CLL
-	GSM331005	MILES stage 1 data N1_1369	Leukemia patient sample	peripheral blood	CLL
-	GSM331006	MILES stage 1 data N1_1370	Leukemia patient sample	peripheral blood	CLL
-	GSM331007	MILES stage 1 data N1_1371	Leukemia patient sample	peripheral blood	CLL
-	GSM331008	MILES stage 1 data N1_1372	Leukemia patient sample	peripheral blood	CLL
-	GSM331009	MILES stage 1 data N1_1373	Leukemia patient sample	peripheral blood	CLL
-	GSM331010	MILES stage 1 data N1_1374	Leukemia patient sample	peripheral blood	CLL
-	GSM331011	MILES stage 1 data N1_1375	Leukemia patient sample	peripheral blood	CLL
-	GSM331012	MILES stage 1 data N1_1376	Leukemia patient sample	peripheral blood	CLL
-	GSM331013	MILES stage 1 data N1_1377	Leukemia patient sample	peripheral blood	CLL
-	GSM331014	MILES stage 1 data N1_1378	Leukemia patient sample	peripheral blood	CLL
-	GSM331015	MILES stage 1 data N1_1379	Leukemia patient sample	peripheral blood	CLL
-	GSM331016	MILES stage 1 data N1_1380	Leukemia patient sample	peripheral blood	CLL
-	GSM331017	MILES stage 1 data N1_1381	Leukemia patient sample	peripheral blood	CLL
-	GSM331018	MILES stage 1 data N1_1382	Leukemia patient sample	peripheral blood	CLL
-	GSM331019	MILES stage 1 data N1_1383	Leukemia patient sample	peripheral blood	CLL
-	GSM331020	MILES stage 1 data N1_1384	Leukemia patient sample	peripheral blood	CLL
-	GSM331021	MILES stage 1 data N1_1385	Leukemia patient sample	peripheral blood	CLL
-	GSM331022	MILES stage 1 data N1_1386	Leukemia patient sample	peripheral blood	CLL
-	GSM331023	MILES stage 1 data N1_1387	Leukemia patient sample	peripheral blood	CLL
-	GSM331024	MILES stage 1 data N1_1388	Leukemia patient sample	peripheral blood	CLL
-	GSM331025	MILES stage 1 data N1_1389	Leukemia patient sample	peripheral blood	CLL
-	GSM331026	MILES stage 1 data N1_1390	Leukemia patient sample	peripheral blood	CLL
-	GSM331027	MILES stage 1 data N1_1391	Leukemia patient sample	peripheral blood	CLL
-	GSM331028	MILES stage 1 data N1_1392	Leukemia patient sample	peripheral blood	CLL
-	GSM331029	MILES stage 1 data N1_1393	Leukemia patient sample	peripheral blood	CLL
-	GSM331030	MILES stage 1 data N1_1394	Leukemia patient sample	peripheral blood	CLL
-	GSM331031	MILES stage 1 data N1_1395	Leukemia patient sample	peripheral blood	CLL
-	GSM331032	MILES stage 1 data N1_1396	Leukemia patient sample	peripheral blood	CLL
-	GSM331033	MILES stage 1 data N1_1397	Leukemia patient sample	peripheral blood	CLL
-	GSM331034	MILES stage 1 data N1_1398	Leukemia patient sample	peripheral blood	CLL
-	GSM331035	MILES stage 1 data N1_1399	Leukemia patient sample	peripheral blood	CLL
-	GSM331036	MILES stage 1 data N1_1400	Leukemia patient sample	peripheral blood	CLL
-	GSM331037	MILES stage 1 data N1_1401	Leukemia patient sample	peripheral blood	CLL
-	GSM331038	MILES stage 1 data N1_1402	Leukemia patient sample	peripheral blood	CLL
-	GSM331039	MILES stage 1 data N1_1403	Leukemia patient sample	peripheral blood	CLL
-	GSM331040	MILES stage 1 data N1_1404	Leukemia patient sample	peripheral blood	CLL
-	GSM331041	MILES stage 1 data N1_1405	Leukemia patient sample	peripheral blood	CLL
-	GSM331042	MILES stage 1 data N1_1406	Leukemia patient sample	peripheral blood	CLL
-	GSM331043	MILES stage 1 data N1_1407	Leukemia patient sample	peripheral blood	CLL
-	GSM331044	MILES stage 1 data N1_1408	Leukemia patient sample	peripheral blood	CLL
-	GSM331045	MILES stage 1 data N1_1409	Leukemia patient sample	peripheral blood	CLL
-	GSM331046	MILES stage 1 data N1_1410	Leukemia patient sample	peripheral blood	CLL
-	GSM331047	MILES stage 1 data N1_1411	Leukemia patient sample	peripheral blood	CLL
-	GSM331048	MILES stage 1 data N1_1412	Leukemia patient sample	peripheral blood	CLL
-	GSM331049	MILES stage 1 data N1_1413	Leukemia patient sample	peripheral blood	CLL
-	GSM331050	MILES stage 1 data N1_1414	Leukemia patient sample	peripheral blood	CLL
-	GSM331051	MILES stage 1 data N1_1415	Leukemia patient sample	peripheral blood	CLL
-	GSM331052	MILES stage 1 data N1_1416	Leukemia patient sample	peripheral blood	CLL
-	GSM331053	MILES stage 1 data N1_1417	Leukemia patient sample	peripheral blood	CLL
-	GSM331054	MILES stage 1 data N1_1418	Leukemia patient sample	peripheral blood	CLL
-	GSM331055	MILES stage 1 data N1_1419	Leukemia patient sample	peripheral blood	CLL
-	GSM331056	MILES stage 1 data N1_1420	Leukemia patient sample	peripheral blood	CLL
-	GSM331057	MILES stage 1 data N1_1421	Leukemia patient sample	peripheral blood	CLL
-	GSM331058	MILES stage 1 data N1_1422	Leukemia patient sample	peripheral blood	CLL
-	GSM331059	MILES stage 1 data N1_1423	Leukemia patient sample	peripheral blood	CLL
-	GSM331060	MILES stage 1 data N1_1424	Leukemia patient sample	peripheral blood	CLL
-	GSM331061	MILES stage 1 data N1_1425	Leukemia patient sample	peripheral blood	CLL
-	GSM331062	MILES stage 1 data N1_1426	Leukemia patient sample	peripheral blood	CLL
-	GSM331063	MILES stage 1 data N1_1427	Leukemia patient sample	peripheral blood	CLL
-	GSM331064	MILES stage 1 data N1_1428	Leukemia patient sample	peripheral blood	CLL
-	GSM331065	MILES stage 1 data N1_1429	Leukemia patient sample	peripheral blood	CLL
-	GSM331066	MILES stage 1 data N1_1430	Leukemia patient sample	peripheral blood	CLL
-	GSM331067	MILES stage 1 data N1_1431	Leukemia patient sample	peripheral blood	CLL
-	GSM331068	MILES stage 1 data N1_1432	Leukemia patient sample	peripheral blood	CLL
-	GSM331069	MILES stage 1 data N1_1433	Leukemia patient sample	peripheral blood	CLL
-	GSM331070	MILES stage 1 data N1_1434	Leukemia patient sample	peripheral blood	CLL
-	GSM331071	MILES stage 1 data N1_1435	Leukemia patient sample	peripheral blood	CLL
-	GSM331072	MILES stage 1 data N1_1436	Leukemia patient sample	peripheral blood	CLL
-	GSM331073	MILES stage 1 data N1_1437	Leukemia patient sample	peripheral blood	CLL
-	GSM331074	MILES stage 1 data N1_1438	Leukemia patient sample	peripheral blood	CLL
-	GSM331075	MILES stage 1 data N1_1439	Leukemia patient sample	peripheral blood	CLL
-	GSM331076	MILES stage 1 data N1_1440	Leukemia patient sample	peripheral blood	CLL
-	GSM331077	MILES stage 1 data N1_1441	Leukemia patient sample	peripheral blood	CLL
-	GSM331078	MILES stage 1 data N1_1442	Leukemia patient sample	peripheral blood	CLL
-	GSM331079	MILES stage 1 data N1_1443	Leukemia patient sample	peripheral blood	CLL
-	GSM331080	MILES stage 1 data N1_1444	Leukemia patient sample	peripheral blood	CLL
-	GSM331081	MILES stage 1 data N1_1445	Leukemia patient sample	peripheral blood	CLL
-	GSM331082	MILES stage 1 data N1_1446	Leukemia patient sample	peripheral blood	CLL
-	GSM331083	MILES stage 1 data N1_1447	Leukemia patient sample	peripheral blood	CLL
-	GSM331084	MILES stage 1 data N1_1448	Leukemia patient sample	peripheral blood	CLL
-	GSM331085	MILES stage 1 data N1_1449	Leukemia patient sample	peripheral blood	CLL
-	GSM331086	MILES stage 1 data N1_1450	Leukemia patient sample	peripheral blood	CLL
-	GSM331087	MILES stage 1 data N1_1451	Leukemia patient sample	peripheral blood	CLL
-	GSM331088	MILES stage 1 data N1_1452	Leukemia patient sample	peripheral blood	CLL
-	GSM331089	MILES stage 1 data N1_1453	Leukemia patient sample	peripheral blood	CLL
-	GSM331090	MILES stage 1 data N1_1454	Leukemia patient sample	peripheral blood	CLL
-	GSM331091	MILES stage 1 data N1_1455	Leukemia patient sample	peripheral blood	CLL
-	GSM331092	MILES stage 1 data N1_1456	Leukemia patient sample	peripheral blood	CLL
-	GSM331093	MILES stage 1 data N1_1457	Leukemia patient sample	peripheral blood	CLL
-	GSM331094	MILES stage 1 data N1_1458	Leukemia patient sample	peripheral blood	CLL
-	GSM331095	MILES stage 1 data N1_1459	Leukemia patient sample	peripheral blood	CLL
-	GSM331096	MILES stage 1 data N1_1460	Leukemia patient sample	peripheral blood	CLL
-	GSM331097	MILES stage 1 data N1_1461	Leukemia patient sample	peripheral blood	CLL
-	GSM331098	MILES stage 1 data N1_1462	Leukemia patient sample	peripheral blood	CLL
-	GSM331099	MILES stage 1 data N1_1463	Leukemia patient sample	peripheral blood	CLL
-	GSM331100	MILES stage 1 data N1_1464	Leukemia patient sample	peripheral blood	CLL
-	GSM331101	MILES stage 1 data N1_1465	Leukemia patient sample	peripheral blood	CLL
-	GSM331102	MILES stage 1 data N1_1466	Leukemia patient sample	peripheral blood	CLL
-	GSM331103	MILES stage 1 data N1_1467	Leukemia patient sample	peripheral blood	CLL
-	GSM331104	MILES stage 1 data N1_1468	Leukemia patient sample	peripheral blood	CLL
-	GSM331105	MILES stage 1 data N1_1469	Leukemia patient sample	peripheral blood	CLL
-	GSM331106	MILES stage 1 data N1_1470	Leukemia patient sample	peripheral blood	CLL
-	GSM331107	MILES stage 1 data N1_1471	Leukemia patient sample	peripheral blood	CLL
-	GSM331108	MILES stage 1 data N1_1472	Leukemia patient sample	peripheral blood	CLL
-	GSM331109	MILES stage 1 data N1_1473	Leukemia patient sample	peripheral blood	CLL
-	GSM331110	MILES stage 1 data N1_1474	Leukemia patient sample	peripheral blood	CLL
-	GSM331111	MILES stage 1 data N1_1475	Leukemia patient sample	peripheral blood	CLL
-	GSM331112	MILES stage 1 data N1_1476	Leukemia patient sample	peripheral blood	CLL
-	GSM331113	MILES stage 1 data N1_1477	Leukemia patient sample	peripheral blood	CLL
-	GSM331114	MILES stage 1 data N1_1478	Leukemia patient sample	peripheral blood	CLL
-	GSM331115	MILES stage 1 data N1_1479	Leukemia patient sample	peripheral blood	CLL
-	GSM331116	MILES stage 1 data N1_1480	Leukemia patient sample	peripheral blood	CLL
-	GSM331117	MILES stage 1 data N1_1481	Leukemia patient sample	peripheral blood	CLL
-	GSM331118	MILES stage 1 data N1_1482	Leukemia patient sample	peripheral blood	CLL
-	GSM331119	MILES stage 1 data N1_1483	Leukemia patient sample	peripheral blood	CLL
-	GSM331120	MILES stage 1 data N1_1484	Leukemia patient sample	peripheral blood	CLL
-	GSM331121	MILES stage 1 data N1_1485	Leukemia patient sample	peripheral blood	CLL
-	GSM331122	MILES stage 1 data N1_1486	Leukemia patient sample	peripheral blood	CLL
-	GSM331123	MILES stage 1 data N1_1487	Leukemia patient sample	peripheral blood	CLL
-	GSM331124	MILES stage 1 data N1_1488	Leukemia patient sample	peripheral blood	CLL
-	GSM331125	MILES stage 1 data N1_1489	Leukemia patient sample	peripheral blood	CLL
-	GSM331126	MILES stage 1 data N1_1490	Leukemia patient sample	peripheral blood	CLL
-	GSM331127	MILES stage 1 data N1_1491	Leukemia patient sample	peripheral blood	CLL
-	GSM331128	MILES stage 1 data N1_1492	Leukemia patient sample	peripheral blood	CLL
-	GSM331129	MILES stage 1 data N1_1493	Leukemia patient sample	peripheral blood	CLL
-	GSM331130	MILES stage 1 data N1_1494	Leukemia patient sample	peripheral blood	CLL
-	GSM331131	MILES stage 1 data N1_1495	Leukemia patient sample	peripheral blood	CLL
-	GSM331132	MILES stage 1 data N1_1496	Leukemia patient sample	peripheral blood	CLL
-	GSM331133	MILES stage 1 data N1_1497	Leukemia patient sample	peripheral blood	CLL
-	GSM331134	MILES stage 1 data N1_1498	Leukemia patient sample	peripheral blood	CLL
-	GSM331135	MILES stage 1 data N1_1499	Leukemia patient sample	peripheral blood	CLL
-	GSM331136	MILES stage 1 data N1_1500	Leukemia patient sample	peripheral blood	CLL
-	GSM331137	MILES stage 1 data N1_1501	Leukemia patient sample	peripheral blood	CLL
-	GSM331138	MILES stage 1 data N1_1502	Leukemia patient sample	peripheral blood	CLL
-	GSM331139	MILES stage 1 data N1_1503	Leukemia patient sample	peripheral blood	CLL
-	GSM331140	MILES stage 1 data N1_1504	Leukemia patient sample	peripheral blood	CLL
-	GSM331141	MILES stage 1 data N1_1505	Leukemia patient sample	peripheral blood	CLL
-	GSM331142	MILES stage 1 data N1_1506	Leukemia patient sample	peripheral blood	CLL
-	GSM331143	MILES stage 1 data N1_1507	Leukemia patient sample	peripheral blood	CLL
-	GSM331144	MILES stage 1 data N1_1508	Leukemia patient sample	peripheral blood	CLL
-	GSM331145	MILES stage 1 data N1_1509	Leukemia patient sample	peripheral blood	CLL
-	GSM331146	MILES stage 1 data N1_1510	Leukemia patient sample	peripheral blood	CLL
-	GSM331147	MILES stage 1 data N1_1511	Leukemia patient sample	peripheral blood	CLL
-	GSM331148	MILES stage 1 data N1_1512	Leukemia patient sample	peripheral blood	CLL
-	GSM331149	MILES stage 1 data N1_1513	Leukemia patient sample	peripheral blood	CLL
-	GSM331150	MILES stage 1 data N1_1514	Leukemia patient sample	peripheral blood	CLL
-	GSM331151	MILES stage 1 data N1_1515	Leukemia patient sample	peripheral blood	CLL
-	GSM331152	MILES stage 1 data N1_1516	Leukemia patient sample	peripheral blood	CLL
-	GSM331153	MILES stage 1 data N1_1517	Leukemia patient sample	peripheral blood	CLL
-	GSM331154	MILES stage 1 data N1_1518	Leukemia patient sample	peripheral blood	CLL
-	GSM331155	MILES stage 1 data N1_1519	Leukemia patient sample	peripheral blood	CLL
-	GSM331156	MILES stage 1 data N1_1520	Leukemia patient sample	peripheral blood	CLL
-	GSM331157	MILES stage 1 data N1_1521	Leukemia patient sample	peripheral blood	CLL
-	GSM331158	MILES stage 1 data N1_1522	Leukemia patient sample	peripheral blood	CLL
-	GSM331159	MILES stage 1 data N1_1523	Leukemia patient sample	peripheral blood	CLL
-	GSM331160	MILES stage 1 data N1_1524	Leukemia patient sample	peripheral blood	CLL
-	GSM331161	MILES stage 1 data N1_1525	Leukemia patient sample	peripheral blood	CLL
-	GSM331162	MILES stage 1 data N1_1526	Leukemia patient sample	peripheral blood	CLL
-	GSM331163	MILES stage 1 data N1_1527	Leukemia patient sample	peripheral blood	CLL
-	GSM331164	MILES stage 1 data N1_1528	Leukemia patient sample	peripheral blood	CLL
-	GSM331165	MILES stage 1 data N1_1529	Leukemia patient sample	peripheral blood	CLL
-	GSM331166	MILES stage 1 data N1_1530	Leukemia patient sample	peripheral blood	CLL
-	GSM331167	MILES stage 1 data N1_1531	Leukemia patient sample	peripheral blood	CLL
-	GSM331168	MILES stage 1 data N1_1532	Leukemia patient sample	peripheral blood	CLL
-	GSM331169	MILES stage 1 data N1_1533	Leukemia patient sample	peripheral blood	CLL
-	GSM331170	MILES stage 1 data N1_1534	Leukemia patient sample	peripheral blood	CLL
-	GSM331171	MILES stage 1 data N1_1535	Leukemia patient sample	peripheral blood	CLL
-	GSM331172	MILES stage 1 data N1_1536	Leukemia patient sample	peripheral blood	CLL
-	GSM331173	MILES stage 1 data N1_1537	Leukemia patient sample	peripheral blood	CLL
-	GSM331174	MILES stage 1 data N1_1538	Leukemia patient sample	peripheral blood	CLL
-	GSM331175	MILES stage 1 data N1_1539	Leukemia patient sample	peripheral blood	CLL
-	GSM331176	MILES stage 1 data N1_1540	Leukemia patient sample	peripheral blood	CLL
-	GSM331177	MILES stage 1 data N1_1541	Leukemia patient sample	peripheral blood	CLL
-	GSM331178	MILES stage 1 data N1_1542	Leukemia patient sample	peripheral blood	CLL
-	GSM331179	MILES stage 1 data N1_1543	Leukemia patient sample	peripheral blood	CLL
-	GSM331180	MILES stage 1 data N1_1544	Leukemia patient sample	peripheral blood	CLL
-	GSM331181	MILES stage 1 data N1_1545	Leukemia patient sample	peripheral blood	CLL
-	GSM331182	MILES stage 1 data N1_1546	Leukemia patient sample	peripheral blood	CLL
-	GSM331183	MILES stage 1 data N1_1547	Leukemia patient sample	peripheral blood	CLL
-	GSM331184	MILES stage 1 data N1_1548	Leukemia patient sample	peripheral blood	CLL
-	GSM331185	MILES stage 1 data N1_1549	Leukemia patient sample	peripheral blood	CLL
-	GSM331186	MILES stage 1 data N1_1550	Leukemia patient sample	peripheral blood	CLL
-	GSM331187	MILES stage 1 data N1_1551	Leukemia patient sample	peripheral blood	CLL
-	GSM331188	MILES stage 1 data N1_1552	Leukemia patient sample	peripheral blood	CLL
-	GSM331189	MILES stage 1 data N1_1553	Leukemia patient sample	peripheral blood	CLL
-	GSM331190	MILES stage 1 data N1_1554	Leukemia patient sample	peripheral blood	CLL
-	GSM331191	MILES stage 1 data N1_1555	Leukemia patient sample	peripheral blood	CLL
-	GSM331192	MILES stage 1 data N1_1556	Leukemia patient sample	peripheral blood	CLL
-	GSM331193	MILES stage 1 data N1_1557	Leukemia patient sample	peripheral blood	CLL
-	GSM331194	MILES stage 1 data N1_1558	Leukemia patient sample	peripheral blood	CLL
-	GSM331195	MILES stage 1 data N1_1559	Leukemia patient sample	peripheral blood	CLL
-	GSM331196	MILES stage 1 data N1_1560	Leukemia patient sample	peripheral blood	CLL
-	GSM331197	MILES stage 1 data N1_1561	Leukemia patient sample	peripheral blood	CLL
-	GSM331198	MILES stage 1 data N1_1562	Leukemia patient sample	peripheral blood	CLL
-	GSM331199	MILES stage 1 data N1_1563	Leukemia patient sample	peripheral blood	CLL
-	GSM331200	MILES stage 1 data N1_1564	Leukemia patient sample	peripheral blood	CLL
-	GSM331201	MILES stage 1 data N1_1565	Leukemia patient sample	peripheral blood	CLL
-	GSM331202	MILES stage 1 data N1_1566	Leukemia patient sample	peripheral blood	CLL
-	GSM331203	MILES stage 1 data N1_1567	Leukemia patient sample	peripheral blood	CLL
-	GSM331204	MILES stage 1 data N1_1568	Leukemia patient sample	peripheral blood	CLL
-	GSM331205	MILES stage 1 data N1_1569	Leukemia patient sample	peripheral blood	CLL
-	GSM331206	MILES stage 1 data N1_1570	Leukemia patient sample	peripheral blood	CLL
-	GSM331207	MILES stage 1 data N1_1571	Leukemia patient sample	peripheral blood	CLL
-	GSM331208	MILES stage 1 data N1_1572	Leukemia patient sample	peripheral blood	CLL
-	GSM331209	MILES stage 1 data N1_1573	Leukemia patient sample	peripheral blood	CLL
-	GSM331210	MILES stage 1 data N1_1574	Leukemia patient sample	peripheral blood	CLL
-	GSM331211	MILES stage 1 data N1_1575	Leukemia patient sample	peripheral blood	CLL
-	GSM331212	MILES stage 1 data N1_1576	Leukemia patient sample	peripheral blood	CLL
-	GSM331213	MILES stage 1 data N1_1577	Leukemia patient sample	peripheral blood	CLL
-	GSM331214	MILES stage 1 data N1_1578	Leukemia patient sample	peripheral blood	CLL
-	GSM331215	MILES stage 1 data N1_1579	Leukemia patient sample	peripheral blood	CLL
-	GSM331216	MILES stage 1 data N1_1580	Leukemia patient sample	peripheral blood	CLL
-	GSM331217	MILES stage 1 data N1_1581	Leukemia patient sample	peripheral blood	CLL
-	GSM331218	MILES stage 1 data N1_1582	Leukemia patient sample	peripheral blood	CLL
-	GSM331219	MILES stage 1 data N1_1583	Leukemia patient sample	peripheral blood	CLL
-	GSM331220	MILES stage 1 data N1_1584	Leukemia patient sample	peripheral blood	CLL
-	GSM331221	MILES stage 1 data N1_1585	Leukemia patient sample	peripheral blood	CLL
-	GSM331222	MILES stage 1 data N1_1586	Leukemia patient sample	peripheral blood	CLL
-	GSM331223	MILES stage 1 data N1_1587	Leukemia patient sample	peripheral blood	CLL
-	GSM331224	MILES stage 1 data N1_1588	Leukemia patient sample	peripheral blood	CLL
-	GSM331225	MILES stage 1 data N1_1589	Leukemia patient sample	peripheral blood	CLL
-	GSM331226	MILES stage 1 data N1_1590	Leukemia patient sample	peripheral blood	CLL
-	GSM331227	MILES stage 1 data N1_1591	Leukemia patient sample	peripheral blood	CLL
-	GSM331228	MILES stage 1 data N1_1592	Leukemia patient sample	peripheral blood	CLL
-	GSM331229	MILES stage 1 data N1_1593	Leukemia patient sample	peripheral blood	CLL
-	GSM331230	MILES stage 1 data N1_1594	Leukemia patient sample	peripheral blood	CLL
-	GSM331231	MILES stage 1 data N1_1595	Leukemia patient sample	peripheral blood	CLL
-	GSM331232	MILES stage 1 data N1_1596	Leukemia patient sample	peripheral blood	CLL
-	GSM331233	MILES stage 1 data N1_1597	Leukemia patient sample	peripheral blood	CLL
-	GSM331234	MILES stage 1 data N1_1598	Leukemia patient sample	peripheral blood	CLL
-	GSM331235	MILES stage 1 data N1_1599	Leukemia patient sample	peripheral blood	CLL
-	GSM331236	MILES stage 1 data N1_1600	Leukemia patient sample	peripheral blood	CLL
-	GSM331237	MILES stage 1 data N1_1601	Leukemia patient sample	peripheral blood	CLL
-	GSM331238	MILES stage 1 data N1_1602	Leukemia patient sample	peripheral blood	CLL
-	GSM331239	MILES stage 1 data N1_1603	Leukemia patient sample	peripheral blood	CLL
-	GSM331240	MILES stage 1 data N1_1604	Leukemia patient sample	peripheral blood	CLL
-	GSM331241	MILES stage 1 data N1_1605	Leukemia patient sample	peripheral blood	CLL
-	GSM331242	MILES stage 1 data N1_1606	Leukemia patient sample	peripheral blood	CLL
-	GSM331243	MILES stage 1 data N1_1607	Leukemia patient sample	peripheral blood	CLL
-	GSM331244	MILES stage 1 data N1_1608	Leukemia patient sample	peripheral blood	CLL
-	GSM331245	MILES stage 1 data N1_1609	Leukemia patient sample	peripheral blood	CLL
-	GSM331246	MILES stage 1 data N1_1610	Leukemia patient sample	peripheral blood	CLL
-	GSM331247	MILES stage 1 data N1_1611	Leukemia patient sample	peripheral blood	CLL
-	GSM331248	MILES stage 1 data N1_1612	Leukemia patient sample	peripheral blood	CLL
-	GSM331249	MILES stage 1 data N1_1613	Leukemia patient sample	peripheral blood	CLL
-	GSM331250	MILES stage 1 data N1_1614	Leukemia patient sample	peripheral blood	CLL
-	GSM331251	MILES stage 1 data N1_1615	Leukemia patient sample	peripheral blood	CLL
-	GSM331252	MILES stage 1 data N1_1616	Leukemia patient sample	peripheral blood	CLL
-	GSM331253	MILES stage 1 data N1_1617	Leukemia patient sample	peripheral blood	CLL
-	GSM331254	MILES stage 1 data N1_1618	Leukemia patient sample	peripheral blood	CLL
-	GSM331255	MILES stage 1 data N1_1619	Leukemia patient sample	peripheral blood	CLL
-	GSM331256	MILES stage 1 data N1_1620	Leukemia patient sample	peripheral blood	CLL
-	GSM331257	MILES stage 1 data N1_1621	Leukemia patient sample	peripheral blood	CLL
-	GSM331258	MILES stage 1 data N1_1622	Leukemia patient sample	peripheral blood	CLL
-	GSM331259	MILES stage 1 data N1_1623	Leukemia patient sample	peripheral blood	CLL
-	GSM331260	MILES stage 1 data N1_1624	Leukemia patient sample	peripheral blood	CLL
-	GSM331261	MILES stage 1 data N1_1625	Leukemia patient sample	peripheral blood	CLL
-	GSM331262	MILES stage 1 data N1_1626	Leukemia patient sample	peripheral blood	CLL
-	GSM331263	MILES stage 1 data N1_1627	Leukemia patient sample	peripheral blood	CLL
-	GSM331264	MILES stage 1 data N1_1628	Leukemia patient sample	peripheral blood	CLL
-	GSM331265	MILES stage 1 data N1_1629	Leukemia patient sample	peripheral blood	CLL
-	GSM331266	MILES stage 1 data N1_1630	Leukemia patient sample	peripheral blood	CLL
-	GSM331267	MILES stage 1 data N1_1631	Leukemia patient sample	peripheral blood	CLL
-	GSM331268	MILES stage 1 data N1_1632	Leukemia patient sample	peripheral blood	CLL
-	GSM331269	MILES stage 1 data N1_1633	Leukemia patient sample	peripheral blood	CLL
-	GSM331270	MILES stage 1 data N1_1634	Leukemia patient sample	peripheral blood	CLL
-	GSM331271	MILES stage 1 data N1_1635	Leukemia patient sample	peripheral blood	CLL
-	GSM331272	MILES stage 1 data N1_1636	Leukemia patient sample	peripheral blood	CLL
-	GSM331273	MILES stage 1 data N1_1637	Leukemia patient sample	peripheral blood	CLL
-	GSM331274	MILES stage 1 data N1_1638	Leukemia patient sample	peripheral blood	CLL
-	GSM331275	MILES stage 1 data N1_1639	Leukemia patient sample	peripheral blood	CLL
-	GSM331276	MILES stage 1 data N1_1640	Leukemia patient sample	peripheral blood	CLL
-	GSM331277	MILES stage 1 data N1_1641	Leukemia patient sample	peripheral blood	CLL
-	GSM331278	MILES stage 1 data N1_1642	Leukemia patient sample	peripheral blood	CLL
-	GSM331279	MILES stage 1 data N1_1643	Leukemia patient sample	peripheral blood	CLL
-	GSM331280	MILES stage 1 data N1_1644	Leukemia patient sample	peripheral blood	CLL
-	GSM331281	MILES stage 1 data N1_1645	Leukemia patient sample	peripheral blood	CLL
-	GSM331282	MILES stage 1 data N1_1646	Leukemia patient sample	peripheral blood	CLL
-	GSM331283	MILES stage 1 data N1_1647	Leukemia patient sample	peripheral blood	CLL
-	GSM331284	MILES stage 1 data N1_1648	Leukemia patient sample	peripheral blood	CLL
-	GSM331285	MILES stage 1 data N1_1649	Leukemia patient sample	peripheral blood	CLL
-	GSM331286	MILES stage 1 data N1_1650	Leukemia patient sample	peripheral blood	CLL
-	GSM331287	MILES stage 1 data N1_1651	Leukemia patient sample	peripheral blood	CLL
-	GSM331288	MILES stage 1 data N1_1652	Leukemia patient sample	peripheral blood	CLL
-	GSM331289	MILES stage 1 data N1_1653	Leukemia patient sample	peripheral blood	CLL
-	GSM331290	MILES stage 1 data N1_1654	Leukemia patient sample	peripheral blood	CLL
-	GSM331291	MILES stage 1 data N1_1655	Leukemia patient sample	peripheral blood	CLL
-	GSM331292	MILES stage 1 data N1_1656	Leukemia patient sample	peripheral blood	CLL
-	GSM331293	MILES stage 1 data N1_1657	Leukemia patient sample	peripheral blood	CLL
-	GSM331294	MILES stage 1 data N1_1658	Leukemia patient sample	peripheral blood	CLL
-	GSM331295	MILES stage 1 data N1_1659	Leukemia patient sample	peripheral blood	CLL
-	GSM331296	MILES stage 1 data N1_1660	Leukemia patient sample	peripheral blood	CLL
-	GSM331297	MILES stage 1 data N1_1661	Leukemia patient sample	peripheral blood	CLL
-	GSM331298	MILES stage 1 data N1_1662	Leukemia patient sample	peripheral blood	CLL
-	GSM331299	MILES stage 1 data N1_1663	Leukemia patient sample	peripheral blood	CLL
-	GSM331300	MILES stage 1 data N1_1664	Leukemia patient sample	peripheral blood	CLL
-	GSM331301	MILES stage 1 data N1_1665	Leukemia patient sample	peripheral blood	CLL
-	GSM331302	MILES stage 1 data N1_1666	Leukemia patient sample	peripheral blood	CLL
-	GSM331303	MILES stage 1 data N1_1667	Leukemia patient sample	peripheral blood	CLL
-	GSM331304	MILES stage 1 data N1_1668	Leukemia patient sample	peripheral blood	CLL
-	GSM331305	MILES stage 1 data N1_1669	Leukemia patient sample	peripheral blood	CLL
-	GSM331306	MILES stage 1 data N1_1670	Leukemia patient sample	peripheral blood	CLL
-	GSM331307	MILES stage 1 data N1_1671	Leukemia patient sample	peripheral blood	CLL
-	GSM331308	MILES stage 1 data N1_1672	Leukemia patient sample	peripheral blood	CLL
-	GSM331309	MILES stage 1 data N1_1673	Leukemia patient sample	peripheral blood	CLL
-	GSM331310	MILES stage 1 data N1_1674	Leukemia patient sample	peripheral blood	CLL
-	GSM331311	MILES stage 1 data N1_1675	Leukemia patient sample	peripheral blood	CLL
-	GSM331312	MILES stage 1 data N1_1676	Leukemia patient sample	peripheral blood	CLL
-	GSM331313	MILES stage 1 data N1_1677	Leukemia patient sample	peripheral blood	CLL
-	GSM331314	MILES stage 1 data N1_1678	Leukemia patient sample	peripheral blood	CLL
-	GSM331315	MILES stage 1 data N1_1679	Leukemia patient sample	peripheral blood	CLL
-	GSM331316	MILES stage 1 data N1_1680	Leukemia patient sample	peripheral blood	CLL
-	GSM331317	MILES stage 1 data N1_1681	Leukemia patient sample	peripheral blood	CLL
-	GSM331318	MILES stage 1 data N1_1682	Leukemia patient sample	peripheral blood	CLL
-	GSM331319	MILES stage 1 data N1_1683	Leukemia patient sample	peripheral blood	CLL
-	GSM331320	MILES stage 1 data N1_1684	Leukemia patient sample	peripheral blood	CLL
-	GSM331321	MILES stage 1 data N1_1685	Leukemia patient sample	peripheral blood	CLL
-	GSM331322	MILES stage 1 data N1_1686	Leukemia patient sample	peripheral blood	CLL
-	GSM331323	MILES stage 1 data N1_1687	Leukemia patient sample	peripheral blood	CLL
-	GSM331324	MILES stage 1 data N1_1688	Leukemia patient sample	peripheral blood	CLL
-	GSM331325	MILES stage 1 data N1_1689	Leukemia patient sample	peripheral blood	CLL
-	GSM331326	MILES stage 1 data N1_1690	Leukemia patient sample	peripheral blood	CLL
-	GSM331327	MILES stage 1 data N1_1691	Leukemia patient sample	peripheral blood	CLL
-	GSM331328	MILES stage 1 data N1_1692	Leukemia patient sample	peripheral blood	CLL
-	GSM331329	MILES stage 1 data N1_1693	Leukemia patient sample	peripheral blood	CLL
-	GSM331330	MILES stage 1 data N1_1694	Leukemia patient sample	peripheral blood	CLL
-	GSM331331	MILES stage 1 data N1_1695	Leukemia patient sample	peripheral blood	CLL
-	GSM331332	MILES stage 1 data N1_1696	Leukemia patient sample	peripheral blood	CLL
-	GSM331333	MILES stage 1 data N1_1697	Leukemia patient sample	peripheral blood	CLL
-	GSM331334	MILES stage 1 data N1_1698	Leukemia patient sample	peripheral blood	CLL
-	GSM331335	MILES stage 1 data N1_1699	Leukemia patient sample	peripheral blood	CLL
-	GSM331336	MILES stage 1 data N1_1700	Leukemia patient sample	peripheral blood	CLL
-	GSM331337	MILES stage 1 data N1_1701	Leukemia patient sample	peripheral blood	CLL
-	GSM331338	MILES stage 1 data N1_1702	Leukemia patient sample	peripheral blood	CLL
-	GSM331339	MILES stage 1 data N1_1703	Leukemia patient sample	peripheral blood	CLL
-	GSM331340	MILES stage 1 data N1_1704	Leukemia patient sample	peripheral blood	CLL
-	GSM331341	MILES stage 1 data N1_1705	Leukemia patient sample	peripheral blood	CLL
-	GSM331342	MILES stage 1 data N1_1706	Leukemia patient sample	peripheral blood	CLL
-	GSM331343	MILES stage 1 data N1_1707	Leukemia patient sample	peripheral blood	CLL
-	GSM331344	MILES stage 1 data N1_1708	Leukemia patient sample	peripheral blood	CLL
-	GSM331345	MILES stage 1 data N1_1709	Leukemia patient sample	peripheral blood	CLL
-	GSM331346	MILES stage 1 data N1_1710	Leukemia patient sample	peripheral blood	CLL
-	GSM331347	MILES stage 1 data N1_1711	Leukemia patient sample	peripheral blood	CLL
-	GSM331348	MILES stage 1 data N1_1712	Leukemia patient sample	peripheral blood	CLL
-	GSM331349	MILES stage 1 data N1_1713	Leukemia patient sample	peripheral blood	CLL
-	GSM331350	MILES stage 1 data N1_1714	Leukemia patient sample	peripheral blood	CLL
-	GSM331351	MILES stage 1 data N1_1715	Leukemia patient sample	peripheral blood	CLL
-	GSM331352	MILES stage 1 data N1_1716	Leukemia patient sample	peripheral blood	CLL
-	GSM331353	MILES stage 1 data N1_1717	Leukemia patient sample	peripheral blood	CLL
-	GSM331354	MILES stage 1 data N1_1718	Leukemia patient sample	peripheral blood	CLL
-	GSM331355	MILES stage 1 data N1_1719	Leukemia patient sample	peripheral blood	CLL
-	GSM331356	MILES stage 1 data N1_1720	Leukemia patient sample	peripheral blood	CLL
-	GSM331357	MILES stage 1 data N1_1721	Leukemia patient sample	peripheral blood	CLL
-	GSM331358	MILES stage 1 data N1_1722	Leukemia patient sample	peripheral blood	CLL
-	GSM331359	MILES stage 1 data N1_1723	Leukemia patient sample	peripheral blood	CLL
-	GSM331360	MILES stage 1 data N1_1724	Leukemia patient sample	peripheral blood	CLL
-	GSM331361	MILES stage 1 data N1_1725	Leukemia patient sample	peripheral blood	CLL
-	GSM331362	MILES stage 1 data N1_1726	Leukemia patient sample	peripheral blood	CLL
-	GSM331363	MILES stage 1 data N1_1727	Leukemia patient sample	peripheral blood	CLL
-	GSM331364	MILES stage 1 data N1_1728	Leukemia patient sample	peripheral blood	CLL
-	GSM331365	MILES stage 1 data N1_1729	Leukemia patient sample	peripheral blood	CLL
-	GSM331366	MILES stage 1 data N1_1730	Leukemia patient sample	peripheral blood	CLL
-	GSM331367	MILES stage 1 data N1_1731	Leukemia patient sample	peripheral blood	CLL
-	GSM331368	MILES stage 1 data N1_1732	Leukemia patient sample	peripheral blood	CLL
-	GSM331369	MILES stage 1 data N1_1733	Leukemia patient sample	peripheral blood	CLL
-	GSM331370	MILES stage 1 data N1_1734	Leukemia patient sample	peripheral blood	CLL
-	GSM331371	MILES stage 1 data N1_1735	Leukemia patient sample	peripheral blood	CLL
-	GSM331372	MILES stage 1 data N1_1736	Leukemia patient sample	peripheral blood	CLL
-	GSM331373	MILES stage 1 data N1_1737	Leukemia patient sample	peripheral blood	CLL
-	GSM331374	MILES stage 1 data N1_1738	Leukemia patient sample	peripheral blood	CLL
-	GSM331375	MILES stage 1 data N1_1739	Leukemia patient sample	peripheral blood	CLL
-	GSM331376	MILES stage 1 data N1_1740	Leukemia patient sample	peripheral blood	CLL
-	GSM331377	MILES stage 1 data N1_1741	Leukemia patient sample	bone marrow	CML
-	GSM331378	MILES stage 1 data N1_1742	Leukemia patient sample	bone marrow	CML
-	GSM331379	MILES stage 1 data N1_1743	Leukemia patient sample	bone marrow	CML
-	GSM331380	MILES stage 1 data N1_1744	Leukemia patient sample	bone marrow	CML
-	GSM331381	MILES stage 1 data N1_1745	Leukemia patient sample	bone marrow	CML
-	GSM331382	MILES stage 1 data N1_1746	Leukemia patient sample	bone marrow	CML
-	GSM331383	MILES stage 1 data N1_1747	Leukemia patient sample	bone marrow	CML
-	GSM331384	MILES stage 1 data N1_1748	Leukemia patient sample	bone marrow	CML
-	GSM331385	MILES stage 1 data N1_1749	Leukemia patient sample	bone marrow	CML
-	GSM331386	MILES stage 1 data N1_1750	Leukemia patient sample	bone marrow	CML
-	GSM331387	MILES stage 1 data N1_1751	Leukemia patient sample	bone marrow	CML
-	GSM331388	MILES stage 1 data N1_1752	Leukemia patient sample	bone marrow	CML
-	GSM331389	MILES stage 1 data N1_1753	Leukemia patient sample	bone marrow	CML
-	GSM331390	MILES stage 1 data N1_1754	Leukemia patient sample	bone marrow	CML
-	GSM331391	MILES stage 1 data N1_1755	Leukemia patient sample	bone marrow	CML
-	GSM331392	MILES stage 1 data N1_1756	Leukemia patient sample	peripheral blood	CML
-	GSM331393	MILES stage 1 data N1_1757	Leukemia patient sample	bone marrow	CML
-	GSM331394	MILES stage 1 data N1_1758	Leukemia patient sample	peripheral blood	CML
-	GSM331395	MILES stage 1 data N1_1759	Leukemia patient sample	bone marrow	CML
-	GSM331396	MILES stage 1 data N1_1760	Leukemia patient sample	bone marrow	CML
-	GSM331397	MILES stage 1 data N1_1761	Leukemia patient sample	bone marrow	CML
-	GSM331398	MILES stage 1 data N1_1762	Leukemia patient sample	peripheral blood	CML
-	GSM331399	MILES stage 1 data N1_1763	Leukemia patient sample	bone marrow	CML
-	GSM331400	MILES stage 1 data N1_1764	Leukemia patient sample	bone marrow	CML
-	GSM331401	MILES stage 1 data N1_1765	Leukemia patient sample	bone marrow	CML
-	GSM331402	MILES stage 1 data N1_1766	Leukemia patient sample	bone marrow	CML
-	GSM331403	MILES stage 1 data N1_1767	Leukemia patient sample	bone marrow	CML
-	GSM331404	MILES stage 1 data N1_1768	Leukemia patient sample	bone marrow	CML
-	GSM331405	MILES stage 1 data N1_1769	Leukemia patient sample	bone marrow	CML
-	GSM331406	MILES stage 1 data N1_1770	Leukemia patient sample	bone marrow	CML
-	GSM331407	MILES stage 1 data N1_1771	Leukemia patient sample	bone marrow	CML
-	GSM331408	MILES stage 1 data N1_1772	Leukemia patient sample	bone marrow	CML
-	GSM331409	MILES stage 1 data N1_1773	Leukemia patient sample	bone marrow	CML
-	GSM331410	MILES stage 1 data N1_1774	Leukemia patient sample	bone marrow	CML
-	GSM331411	MILES stage 1 data N1_1775	Leukemia patient sample	bone marrow	CML
-	GSM331412	MILES stage 1 data N1_1776	Leukemia patient sample	bone marrow	CML
-	GSM331413	MILES stage 1 data N1_1777	Leukemia patient sample	bone marrow	CML
-	GSM331414	MILES stage 1 data N1_1778	Leukemia patient sample	bone marrow	CML
-	GSM331415	MILES stage 1 data N1_1779	Leukemia patient sample	peripheral blood	CML
-	GSM331416	MILES stage 1 data N1_1780	Leukemia patient sample	bone marrow	CML
-	GSM331417	MILES stage 1 data N1_1781	Leukemia patient sample	bone marrow	CML
-	GSM331418	MILES stage 1 data N1_1782	Leukemia patient sample	bone marrow	CML
-	GSM331419	MILES stage 1 data N1_1783	Leukemia patient sample	bone marrow	CML
-	GSM331420	MILES stage 1 data N1_1784	Leukemia patient sample	bone marrow	CML
-	GSM331421	MILES stage 1 data N1_1785	Leukemia patient sample	bone marrow	CML
-	GSM331422	MILES stage 1 data N1_1786	Leukemia patient sample	bone marrow	CML
-	GSM331423	MILES stage 1 data N1_1787	Leukemia patient sample	peripheral blood	CML
-	GSM331424	MILES stage 1 data N1_1788	Leukemia patient sample	bone marrow	CML
-	GSM331425	MILES stage 1 data N1_1789	Leukemia patient sample	bone marrow	CML
-	GSM331426	MILES stage 1 data N1_1790	Leukemia patient sample	bone marrow	CML
-	GSM331427	MILES stage 1 data N1_1791	Leukemia patient sample	bone marrow	CML
-	GSM331428	MILES stage 1 data N1_1792	Leukemia patient sample	bone marrow	CML
-	GSM331429	MILES stage 1 data N1_1793	Leukemia patient sample	bone marrow	CML
-	GSM331430	MILES stage 1 data N1_1794	Leukemia patient sample	bone marrow	CML
-	GSM331431	MILES stage 1 data N1_1795	Leukemia patient sample	bone marrow	CML
-	GSM331432	MILES stage 1 data N1_1796	Leukemia patient sample	bone marrow	CML
-	GSM331433	MILES stage 1 data N1_1797	Leukemia patient sample	peripheral blood	CML
-	GSM331434	MILES stage 1 data N1_1798	Leukemia patient sample	bone marrow	CML
-	GSM331435	MILES stage 1 data N1_1799	Leukemia patient sample	peripheral blood	CML
-	GSM331436	MILES stage 1 data N1_1800	Leukemia patient sample	bone marrow	CML
-	GSM331437	MILES stage 1 data N1_1801	Leukemia patient sample	peripheral blood	CML
-	GSM331438	MILES stage 1 data N1_1802	Leukemia patient sample	bone marrow	CML
-	GSM331439	MILES stage 1 data N1_1803	Leukemia patient sample	bone marrow	CML
-	GSM331440	MILES stage 1 data N1_1804	Leukemia patient sample	bone marrow	CML
-	GSM331441	MILES stage 1 data N1_1805	Leukemia patient sample	bone marrow	CML
-	GSM331442	MILES stage 1 data N1_1806	Leukemia patient sample	bone marrow	CML
-	GSM331443	MILES stage 1 data N1_1807	Leukemia patient sample	bone marrow	CML
-	GSM331444	MILES stage 1 data N1_1808	Leukemia patient sample	bone marrow	CML
-	GSM331445	MILES stage 1 data N1_1809	Leukemia patient sample	bone marrow	CML
-	GSM331446	MILES stage 1 data N1_1810	Leukemia patient sample	bone marrow	CML
-	GSM331447	MILES stage 1 data N1_1811	Leukemia patient sample	bone marrow	CML
-	GSM331448	MILES stage 1 data N1_1812	Leukemia patient sample	bone marrow	CML
-	GSM331449	MILES stage 1 data N1_1813	Leukemia patient sample	peripheral blood	CML
-	GSM331450	MILES stage 1 data N1_1814	Leukemia patient sample	bone marrow	CML
-	GSM331451	MILES stage 1 data N1_1815	Leukemia patient sample	peripheral blood	CML
-	GSM331452	MILES stage 1 data N1_1816	Leukemia patient sample	bone marrow	CML
-	GSM331453	MILES stage 1 data N1_1817	Leukemia patient sample	bone marrow	MDS
-	GSM331454	MILES stage 1 data N1_1818	Leukemia patient sample	bone marrow	MDS
-	GSM331455	MILES stage 1 data N1_1819	Leukemia patient sample	bone marrow	MDS
-	GSM331456	MILES stage 1 data N1_1820	Leukemia patient sample	bone marrow	MDS
-	GSM331457	MILES stage 1 data N1_1821	Leukemia patient sample	bone marrow	MDS
-	GSM331458	MILES stage 1 data N1_1822	Leukemia patient sample	bone marrow	MDS
-	GSM331459	MILES stage 1 data N1_1823	Leukemia patient sample	bone marrow	MDS
-	GSM331460	MILES stage 1 data N1_1824	Leukemia patient sample	bone marrow	MDS
-	GSM331461	MILES stage 1 data N1_1825	Leukemia patient sample	bone marrow	MDS
-	GSM331462	MILES stage 1 data N1_1826	Leukemia patient sample	bone marrow	MDS
-	GSM331463	MILES stage 1 data N1_1827	Leukemia patient sample	bone marrow	MDS
-	GSM331464	MILES stage 1 data N1_1828	Leukemia patient sample	bone marrow	MDS
-	GSM331465	MILES stage 1 data N1_1829	Leukemia patient sample	bone marrow	MDS
-	GSM331466	MILES stage 1 data N1_1830	Leukemia patient sample	bone marrow	MDS
-	GSM331467	MILES stage 1 data N1_1831	Leukemia patient sample	bone marrow	MDS
-	GSM331468	MILES stage 1 data N1_1832	Leukemia patient sample	bone marrow	MDS
-	GSM331469	MILES stage 1 data N1_1833	Leukemia patient sample	bone marrow	MDS
-	GSM331470	MILES stage 1 data N1_1834	Leukemia patient sample	bone marrow	MDS
-	GSM331471	MILES stage 1 data N1_1835	Leukemia patient sample	bone marrow	MDS
-	GSM331472	MILES stage 1 data N1_1836	Leukemia patient sample	bone marrow	MDS
-	GSM331473	MILES stage 1 data N1_1837	Leukemia patient sample	bone marrow	MDS
-	GSM331474	MILES stage 1 data N1_1838	Leukemia patient sample	bone marrow	MDS
-	GSM331475	MILES stage 1 data N1_1839	Leukemia patient sample	bone marrow	MDS
-	GSM331476	MILES stage 1 data N1_1840	Leukemia patient sample	bone marrow	MDS
-	GSM331477	MILES stage 1 data N1_1841	Leukemia patient sample	bone marrow	MDS
-	GSM331478	MILES stage 1 data N1_1842	Leukemia patient sample	bone marrow	MDS
-	GSM331479	MILES stage 1 data N1_1843	Leukemia patient sample	bone marrow	MDS
-	GSM331480	MILES stage 1 data N1_1844	Leukemia patient sample	bone marrow	MDS
-	GSM331481	MILES stage 1 data N1_1845	Leukemia patient sample	bone marrow	MDS
-	GSM331482	MILES stage 1 data N1_1846	Leukemia patient sample	bone marrow	MDS
-	GSM331483	MILES stage 1 data N1_1847	Leukemia patient sample	bone marrow	MDS
-	GSM331484	MILES stage 1 data N1_1848	Leukemia patient sample	bone marrow	MDS
-	GSM331485	MILES stage 1 data N1_1849	Leukemia patient sample	bone marrow	MDS
-	GSM331486	MILES stage 1 data N1_1850	Leukemia patient sample	bone marrow	MDS
-	GSM331487	MILES stage 1 data N1_1851	Leukemia patient sample	bone marrow	MDS
-	GSM331488	MILES stage 1 data N1_1852	Leukemia patient sample	bone marrow	MDS
-	GSM331489	MILES stage 1 data N1_1853	Leukemia patient sample	bone marrow	MDS
-	GSM331490	MILES stage 1 data N1_1854	Leukemia patient sample	bone marrow	MDS
-	GSM331491	MILES stage 1 data N1_1855	Leukemia patient sample	bone marrow	MDS
-	GSM331492	MILES stage 1 data N1_1856	Leukemia patient sample	bone marrow	MDS
-	GSM331493	MILES stage 1 data N1_1857	Leukemia patient sample	bone marrow	MDS
-	GSM331494	MILES stage 1 data N1_1858	Leukemia patient sample	bone marrow	MDS
-	GSM331495	MILES stage 1 data N1_1859	Leukemia patient sample	bone marrow	MDS
-	GSM331496	MILES stage 1 data N1_1860	Leukemia patient sample	bone marrow	MDS
-	GSM331497	MILES stage 1 data N1_1861	Leukemia patient sample	bone marrow	MDS
-	GSM331498	MILES stage 1 data N1_1862	Leukemia patient sample	bone marrow	MDS
-	GSM331499	MILES stage 1 data N1_1863	Leukemia patient sample	bone marrow	MDS
-	GSM331500	MILES stage 1 data N1_1864	Leukemia patient sample	bone marrow	MDS
-	GSM331501	MILES stage 1 data N1_1865	Leukemia patient sample	bone marrow	MDS
-	GSM331502	MILES stage 1 data N1_1866	Leukemia patient sample	bone marrow	MDS
-	GSM331503	MILES stage 1 data N1_1867	Leukemia patient sample	bone marrow	MDS
-	GSM331504	MILES stage 1 data N1_1868	Leukemia patient sample	bone marrow	MDS
-	GSM331505	MILES stage 1 data N1_1869	Leukemia patient sample	bone marrow	MDS
-	GSM331506	MILES stage 1 data N1_1870	Leukemia patient sample	bone marrow	MDS
-	GSM331507	MILES stage 1 data N1_1871	Leukemia patient sample	bone marrow	MDS
-	GSM331508	MILES stage 1 data N1_1872	Leukemia patient sample	bone marrow	MDS
-	GSM331509	MILES stage 1 data N1_1873	Leukemia patient sample	bone marrow	MDS
-	GSM331510	MILES stage 1 data N1_1874	Leukemia patient sample	bone marrow	MDS
-	GSM331511	MILES stage 1 data N1_1875	Leukemia patient sample	bone marrow	MDS
-	GSM331512	MILES stage 1 data N1_1876	Leukemia patient sample	bone marrow	MDS
-	GSM331513	MILES stage 1 data N1_1877	Leukemia patient sample	bone marrow	MDS
-	GSM331514	MILES stage 1 data N1_1878	Leukemia patient sample	bone marrow	MDS
-	GSM331515	MILES stage 1 data N1_1879	Leukemia patient sample	bone marrow	MDS
-	GSM331516	MILES stage 1 data N1_1880	Leukemia patient sample	bone marrow	MDS
-	GSM331517	MILES stage 1 data N1_1881	Leukemia patient sample	bone marrow	MDS
-	GSM331518	MILES stage 1 data N1_1882	Leukemia patient sample	bone marrow	MDS
-	GSM331519	MILES stage 1 data N1_1883	Leukemia patient sample	bone marrow	MDS
-	GSM331520	MILES stage 1 data N1_1884	Leukemia patient sample	bone marrow	MDS
-	GSM331521	MILES stage 1 data N1_1885	Leukemia patient sample	bone marrow	MDS
-	GSM331522	MILES stage 1 data N1_1886	Leukemia patient sample	bone marrow	MDS
-	GSM331523	MILES stage 1 data N1_1887	Leukemia patient sample	bone marrow	MDS
-	GSM331524	MILES stage 1 data N1_1888	Leukemia patient sample	bone marrow	MDS
-	GSM331525	MILES stage 1 data N1_1889	Leukemia patient sample	bone marrow	MDS
-	GSM331526	MILES stage 1 data N1_1890	Leukemia patient sample	bone marrow	MDS
-	GSM331527	MILES stage 1 data N1_1891	Leukemia patient sample	bone marrow	MDS
-	GSM331528	MILES stage 1 data N1_1892	Leukemia patient sample	bone marrow	MDS
-	GSM331529	MILES stage 1 data N1_1893	Leukemia patient sample	bone marrow	MDS
-	GSM331530	MILES stage 1 data N1_1894	Leukemia patient sample	bone marrow	MDS
-	GSM331531	MILES stage 1 data N1_1895	Leukemia patient sample	bone marrow	MDS
-	GSM331532	MILES stage 1 data N1_1896	Leukemia patient sample	bone marrow	MDS
-	GSM331533	MILES stage 1 data N1_1897	Leukemia patient sample	bone marrow	MDS
-	GSM331534	MILES stage 1 data N1_1898	Leukemia patient sample	bone marrow	MDS
-	GSM331535	MILES stage 1 data N1_1899	Leukemia patient sample	bone marrow	MDS
-	GSM331536	MILES stage 1 data N1_1900	Leukemia patient sample	bone marrow	MDS
-	GSM331537	MILES stage 1 data N1_1901	Leukemia patient sample	bone marrow	MDS
-	GSM331538	MILES stage 1 data N1_1902	Leukemia patient sample	bone marrow	MDS
-	GSM331539	MILES stage 1 data N1_1903	Leukemia patient sample	bone marrow	MDS
-	GSM331540	MILES stage 1 data N1_1904	Leukemia patient sample	bone marrow	MDS
-	GSM331541	MILES stage 1 data N1_1905	Leukemia patient sample	bone marrow	MDS
-	GSM331542	MILES stage 1 data N1_1906	Leukemia patient sample	bone marrow	MDS
-	GSM331543	MILES stage 1 data N1_1907	Leukemia patient sample	bone marrow	MDS
-	GSM331544	MILES stage 1 data N1_1908	Leukemia patient sample	bone marrow	MDS
-	GSM331545	MILES stage 1 data N1_1909	Leukemia patient sample	bone marrow	MDS
-	GSM331546	MILES stage 1 data N1_1910	Leukemia patient sample	bone marrow	MDS
-	GSM331547	MILES stage 1 data N1_1911	Leukemia patient sample	bone marrow	MDS
-	GSM331548	MILES stage 1 data N1_1912	Leukemia patient sample	bone marrow	MDS
-	GSM331549	MILES stage 1 data N1_1913	Leukemia patient sample	bone marrow	MDS
-	GSM331550	MILES stage 1 data N1_1914	Leukemia patient sample	bone marrow	MDS
-	GSM331551	MILES stage 1 data N1_1915	Leukemia patient sample	bone marrow	MDS
-	GSM331552	MILES stage 1 data N1_1916	Leukemia patient sample	bone marrow	MDS
-	GSM331553	MILES stage 1 data N1_1917	Leukemia patient sample	bone marrow	MDS
-	GSM331554	MILES stage 1 data N1_1918	Leukemia patient sample	bone marrow	MDS
-	GSM331555	MILES stage 1 data N1_1919	Leukemia patient sample	bone marrow	MDS
-	GSM331556	MILES stage 1 data N1_1920	Leukemia patient sample	bone marrow	MDS
-	GSM331557	MILES stage 1 data N1_1921	Leukemia patient sample	bone marrow	MDS
-	GSM331558	MILES stage 1 data N1_1922	Leukemia patient sample	bone marrow	MDS
-	GSM331559	MILES stage 1 data N1_1923	Leukemia patient sample	bone marrow	MDS
-	GSM331560	MILES stage 1 data N1_1924	Leukemia patient sample	bone marrow	MDS
-	GSM331561	MILES stage 1 data N1_1925	Leukemia patient sample	bone marrow	MDS
-	GSM331562	MILES stage 1 data N1_1926	Leukemia patient sample	bone marrow	MDS
-	GSM331563	MILES stage 1 data N1_1927	Leukemia patient sample	bone marrow	MDS
-	GSM331564	MILES stage 1 data N1_1928	Leukemia patient sample	bone marrow	MDS
-	GSM331565	MILES stage 1 data N1_1929	Leukemia patient sample	bone marrow	MDS
-	GSM331566	MILES stage 1 data N1_1930	Leukemia patient sample	bone marrow	MDS
-	GSM331567	MILES stage 1 data N1_1931	Leukemia patient sample	bone marrow	MDS
-	GSM331568	MILES stage 1 data N1_1932	Leukemia patient sample	bone marrow	MDS
-	GSM331569	MILES stage 1 data N1_1933	Leukemia patient sample	bone marrow	MDS
-	GSM331570	MILES stage 1 data N1_1934	Leukemia patient sample	bone marrow	MDS
-	GSM331571	MILES stage 1 data N1_1935	Leukemia patient sample	bone marrow	MDS
-	GSM331572	MILES stage 1 data N1_1936	Leukemia patient sample	bone marrow	MDS
-	GSM331573	MILES stage 1 data N1_1937	Leukemia patient sample	bone marrow	MDS
-	GSM331574	MILES stage 1 data N1_1938	Leukemia patient sample	bone marrow	MDS
-	GSM331575	MILES stage 1 data N1_1939	Leukemia patient sample	bone marrow	MDS
-	GSM331576	MILES stage 1 data N1_1940	Leukemia patient sample	bone marrow	MDS
-	GSM331577	MILES stage 1 data N1_1941	Leukemia patient sample	bone marrow	MDS
-	GSM331578	MILES stage 1 data N1_1942	Leukemia patient sample	bone marrow	MDS
-	GSM331579	MILES stage 1 data N1_1943	Leukemia patient sample	bone marrow	MDS
-	GSM331580	MILES stage 1 data N1_1944	Leukemia patient sample	bone marrow	MDS
-	GSM331581	MILES stage 1 data N1_1945	Leukemia patient sample	bone marrow	MDS
-	GSM331582	MILES stage 1 data N1_1946	Leukemia patient sample	bone marrow	MDS
-	GSM331583	MILES stage 1 data N1_1947	Leukemia patient sample	bone marrow	MDS
-	GSM331584	MILES stage 1 data N1_1948	Leukemia patient sample	bone marrow	MDS
-	GSM331585	MILES stage 1 data N1_1949	Leukemia patient sample	bone marrow	MDS
-	GSM331586	MILES stage 1 data N1_1950	Leukemia patient sample	bone marrow	MDS
-	GSM331587	MILES stage 1 data N1_1951	Leukemia patient sample	bone marrow	MDS
-	GSM331588	MILES stage 1 data N1_1952	Leukemia patient sample	bone marrow	MDS
-	GSM331589	MILES stage 1 data N1_1953	Leukemia patient sample	bone marrow	MDS
-	GSM331590	MILES stage 1 data N1_1954	Leukemia patient sample	bone marrow	MDS
-	GSM331591	MILES stage 1 data N1_1955	Leukemia patient sample	bone marrow	MDS
-	GSM331592	MILES stage 1 data N1_1956	Leukemia patient sample	bone marrow	MDS
-	GSM331593	MILES stage 1 data N1_1957	Leukemia patient sample	bone marrow	MDS
-	GSM331594	MILES stage 1 data N1_1958	Leukemia patient sample	bone marrow	MDS
-	GSM331595	MILES stage 1 data N1_1959	Leukemia patient sample	bone marrow	MDS
-	GSM331596	MILES stage 1 data N1_1960	Leukemia patient sample	bone marrow	MDS
-	GSM331597	MILES stage 1 data N1_1961	Leukemia patient sample	bone marrow	MDS
-	GSM331598	MILES stage 1 data N1_1962	Leukemia patient sample	bone marrow	MDS
-	GSM331599	MILES stage 1 data N1_1963	Leukemia patient sample	bone marrow	MDS
-	GSM331600	MILES stage 1 data N1_1964	Leukemia patient sample	bone marrow	MDS
-	GSM331601	MILES stage 1 data N1_1965	Leukemia patient sample	bone marrow	MDS
-	GSM331602	MILES stage 1 data N1_1966	Leukemia patient sample	bone marrow	MDS
-	GSM331603	MILES stage 1 data N1_1967	Leukemia patient sample	bone marrow	MDS
-	GSM331604	MILES stage 1 data N1_1968	Leukemia patient sample	bone marrow	MDS
-	GSM331605	MILES stage 1 data N1_1969	Leukemia patient sample	bone marrow	MDS
-	GSM331606	MILES stage 1 data N1_1970	Leukemia patient sample	bone marrow	MDS
-	GSM331607	MILES stage 1 data N1_1971	Leukemia patient sample	bone marrow	MDS
-	GSM331608	MILES stage 1 data N1_1972	Leukemia patient sample	bone marrow	MDS
-	GSM331609	MILES stage 1 data N1_1973	Leukemia patient sample	bone marrow	MDS
-	GSM331610	MILES stage 1 data N1_1974	Leukemia patient sample	bone marrow	MDS
-	GSM331611	MILES stage 1 data N1_1975	Leukemia patient sample	bone marrow	MDS
-	GSM331612	MILES stage 1 data N1_1976	Leukemia patient sample	bone marrow	MDS
-	GSM331613	MILES stage 1 data N1_1977	Leukemia patient sample	bone marrow	MDS
-	GSM331614	MILES stage 1 data N1_1978	Leukemia patient sample	bone marrow	MDS
-	GSM331615	MILES stage 1 data N1_1979	Leukemia patient sample	bone marrow	MDS
-	GSM331616	MILES stage 1 data N1_1980	Leukemia patient sample	bone marrow	MDS
-	GSM331617	MILES stage 1 data N1_1981	Leukemia patient sample	bone marrow	MDS
-	GSM331618	MILES stage 1 data N1_1982	Leukemia patient sample	bone marrow	MDS
-	GSM331619	MILES stage 1 data N1_1983	Leukemia patient sample	bone marrow	MDS
-	GSM331620	MILES stage 1 data N1_1984	Leukemia patient sample	bone marrow	MDS
-	GSM331621	MILES stage 1 data N1_1985	Leukemia patient sample	bone marrow	MDS
-	GSM331622	MILES stage 1 data N1_1986	Leukemia patient sample	bone marrow	MDS
-	GSM331623	MILES stage 1 data N1_1987	Leukemia patient sample	bone marrow	MDS
-	GSM331624	MILES stage 1 data N1_1988	Leukemia patient sample	bone marrow	MDS
-	GSM331625	MILES stage 1 data N1_1989	Leukemia patient sample	bone marrow	MDS
-	GSM331626	MILES stage 1 data N1_1990	Leukemia patient sample	bone marrow	MDS
-	GSM331627	MILES stage 1 data N1_1991	Leukemia patient sample	bone marrow	MDS
-	GSM331628	MILES stage 1 data N1_1992	Leukemia patient sample	bone marrow	MDS
-	GSM331629	MILES stage 1 data N1_1993	Leukemia patient sample	bone marrow	MDS
-	GSM331630	MILES stage 1 data N1_1994	Leukemia patient sample	bone marrow	MDS
-	GSM331631	MILES stage 1 data N1_1995	Leukemia patient sample	bone marrow	MDS
-	GSM331632	MILES stage 1 data N1_1996	Leukemia patient sample	bone marrow	MDS
-	GSM331633	MILES stage 1 data N1_1997	Leukemia patient sample	bone marrow	MDS
-	GSM331634	MILES stage 1 data N1_1998	Leukemia patient sample	bone marrow	MDS
-	GSM331635	MILES stage 1 data N1_1999	Leukemia patient sample	bone marrow	MDS
[truncated: 97 more rows]
